# Supplementary material
Source: HighWire-hosted journal article supplement (https://erj.ersjournals.com/content/61/4/2200735)
Supplement: inline-supplementary-material-1 [file inline-supplementary-material-1.pdf]

## **Supplementary materials**

ERS/ESICM/ESCMID/ALAT guidelines for the management of severe community-acquired pneumonia (sCAP).

Ignacio Martin-Loeches, Antoni Torres, Blin Nagavci, Stefano Aliberti, Massimo Antonelli, Matteo Bassetti, Lieuwe Bos, James Chalmers, Lennie Derde, Jan de Waele , Jose Garnacho-Montero, Marin Kollef, Carlos Luna, Rosario Menendez, Michael Niederman, Dimitry Ponomarev, Marcos Restrepo, David Rigau, Marcus Schultz, Emmanuele Weiss, Tobias Welte, Richard Wunderick.

## Table of Contents

|                                                                                                                                                                                                                                                              |     |
|--------------------------------------------------------------------------------------------------------------------------------------------------------------------------------------------------------------------------------------------------------------|-----|
| Question 1. In patients with sCAP should rapid microbiologic techniques be added to current testing of blood and respiratory tract samples? .....                                                                                                            | 3   |
| Question 2. In hypoxemic patients with sCAP, can either non-invasive mechanical ventilation (NIV) or high-flow nasal oxygen (HFNC) be used initially—rather than supplemental standard oxygen administration—to avoid intubation and reduce mortality? ..... | 23  |
| Question 3. When using initial empiric therapy for sCAP, should a macrolide or fluoroquinolone be used as part of combination therapy, to reduce mortality and adverse clinical outcomes? .....                                                              | 38  |
| Question 4. In patients with sCAP, can serum procalcitonin (PCT) be used to reduce the duration of antibiotic therapy and improve other outcomes in comparison to standard of care not guided by serial biomarker measurements? .....                        | 55  |
| Question 5. Should oseltamivir be added to standard therapy in patients with sCAP and confirmed influenza? .....                                                                                                                                             | 63  |
| Question 6. Does the addition of steroids to antibiotic therapy in specific sCAP populations lead to better outcomes in comparison to when steroid therapy is not used? .....                                                                                | 72  |
| Question 7. Does the use of a prediction score for drug-resistant pathogens lead to more appropriate therapy and improved outcomes (mortality, treatment failure, duration of antibiotic therapy, prolonged ICU stay)? .....                                 | 86  |
| Question 8. Do patients with sCAP and aspiration risk factors have better outcomes (mortality, LOS, treatment failure) if treated with a risk-based therapy regimen instead of standard sCAP antibiotics? .....                                              | 104 |
| Search strategies .....                                                                                                                                                                                                                                      | 111 |

Question 1. In patients with sCAP should rapid microbiologic techniques be added to current testing of blood and respiratory tract samples?

**PRISMA Flow Diagram (Searches for RCTs)\***

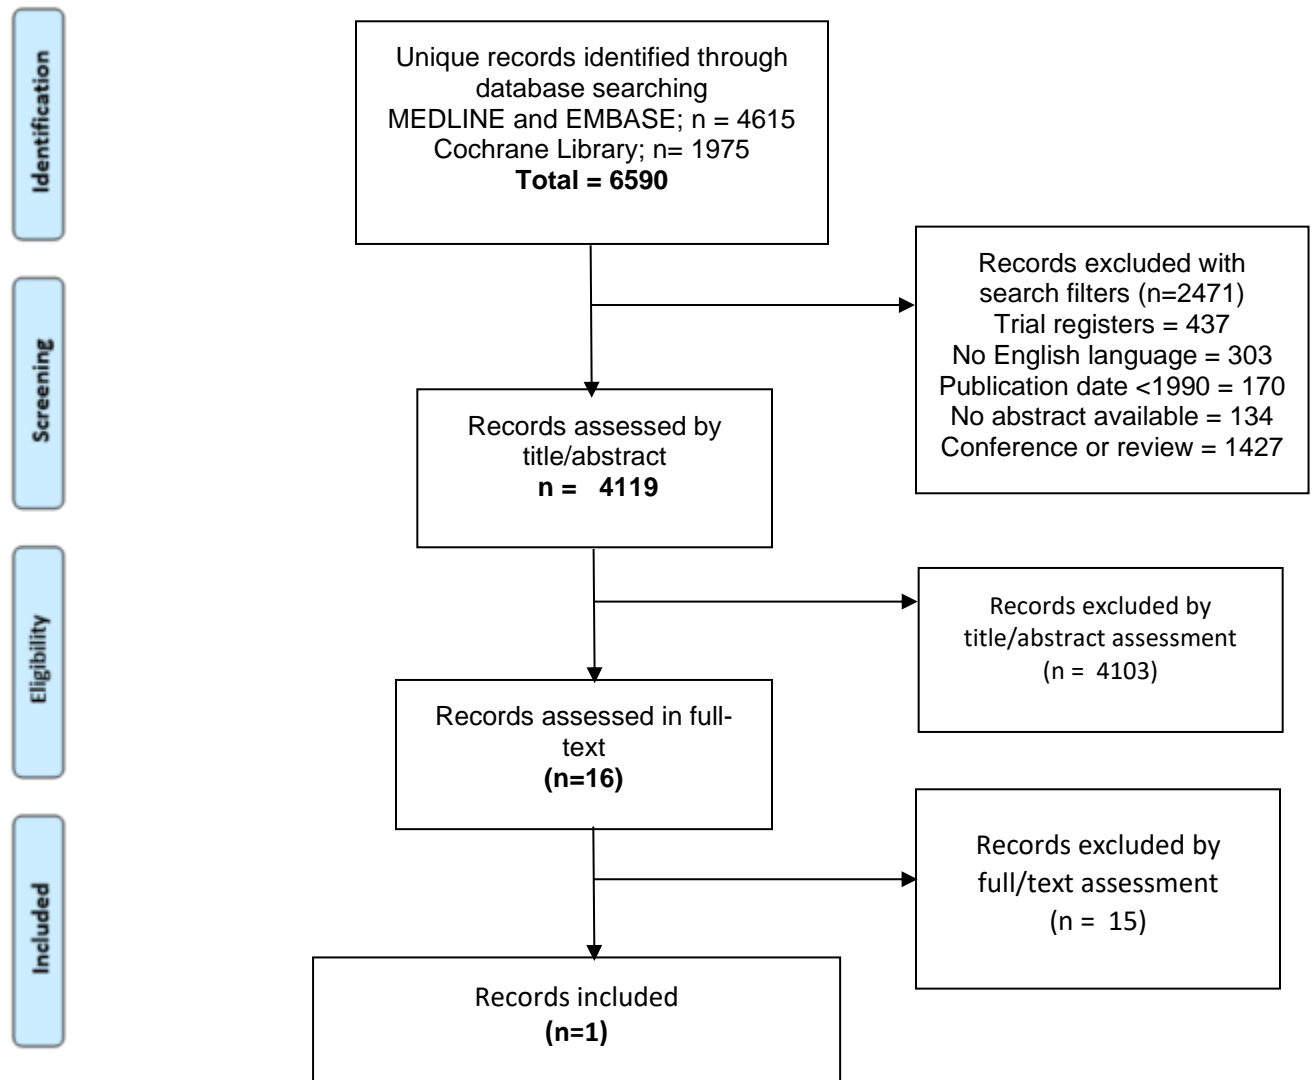

\*For this PICO two separate searches were performed, one for RCTs and one for SRs.

From: Moher D, Liberati A, Tetzlaff J, Altman DG, The PRISMA Group (2009). Preferred Reporting Items for Systematic Reviews and Meta-Analyses: The PRISMA Statement. PLoS Med 6(6): e1000097. doi:10.1371/journal.pmed1000097

For more information, visit [www.prisma-statement.org](http://www.prisma-statement.org).

## PRISMA Flow Diagram (Searches for Systematic Reviews)\*

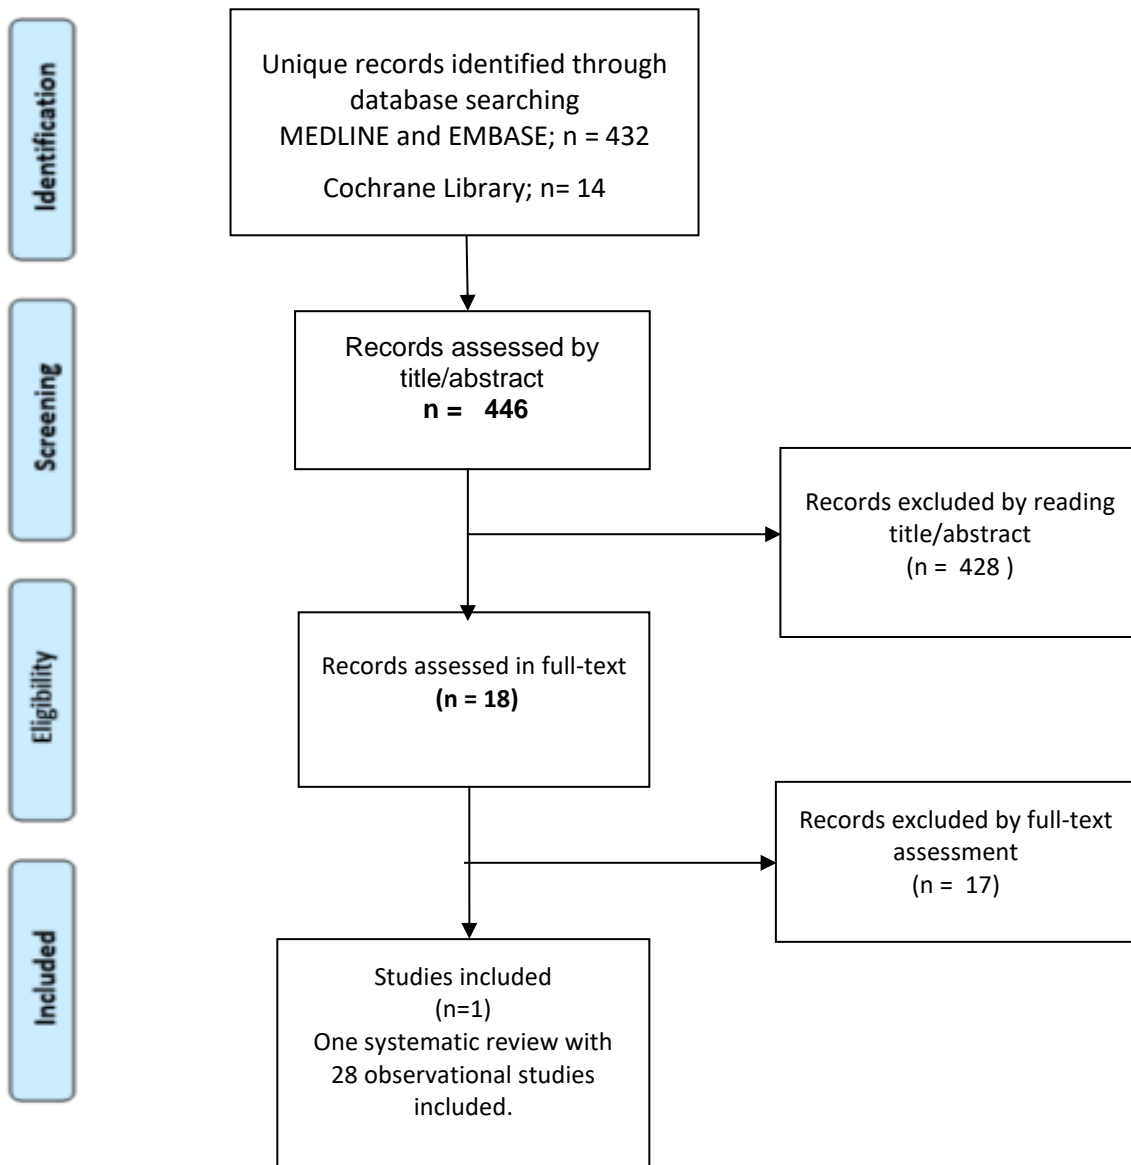

\*For this PICO two separate searches were performed, one for RCTs and one for SRs.

From: Moher D, Liberati A, Tetzlaff J, Altman DG, The PRISMA Group (2009). Preferred Reporting Items for Systematic Reviews and Meta-Analyses: The PRISMA Statement. PLoS Med 6(6): e1000097. doi:10.1371/journal.pmed1000097

For more information, visit [www.prisma-statement.org](http://www.prisma-statement.org).

## Evidence Profiles

Question 1. In patients with sCAP should rapid microbiologic techniques be added to current testing of blood and respiratory tract samples?

| Certainty assessment |              |              |               |              |             |                      | No of patients                                 |                                                        | Effect            |                   | Certainty | Importance |
|----------------------|--------------|--------------|---------------|--------------|-------------|----------------------|------------------------------------------------|--------------------------------------------------------|-------------------|-------------------|-----------|------------|
| No of studies        | Study design | Risk of bias | Inconsistency | Indirectness | Imprecision | Other considerations | Rapid diagnostic microbiological methods (PCR) | Non rapid diagnostic microbiological methods (control) | Relative (95% CI) | Absolute (95% CI) |           |            |

### Incremental detection rate

|    |                                    |             |                      |                           |             |      |      |      |   |                                                        |                  |          |
|----|------------------------------------|-------------|----------------------|---------------------------|-------------|------|------|------|---|--------------------------------------------------------|------------------|----------|
| 23 | observational studies <sup>1</sup> | not serious | serious <sup>a</sup> | very serious <sup>b</sup> | not serious | none | 2916 | 4189 | - | MD 16<br>percentual points more<br>(15 more to 3 more) | ⊕○○○<br>VERY LOW | CRITICAL |
|----|------------------------------------|-------------|----------------------|---------------------------|-------------|------|------|------|---|--------------------------------------------------------|------------------|----------|

### PCR detection rate

|    |                                    |             |                      |                           |             |      |      |   |   |                                            |                  |          |
|----|------------------------------------|-------------|----------------------|---------------------------|-------------|------|------|---|---|--------------------------------------------|------------------|----------|
| 12 | observational studies <sup>1</sup> | not serious | serious <sup>a</sup> | very serious <sup>c</sup> | not serious | none | 2196 | 0 | - | mean 29<br>percentual points<br>(17 to 27) | ⊕○○○<br>VERY LOW | CRITICAL |
|----|------------------------------------|-------------|----------------------|---------------------------|-------------|------|------|---|---|--------------------------------------------|------------------|----------|

### non-PCR detection rate

|   |                                    |             |                      |                           |             |      |   |      |   |                                           |                  |          |
|---|------------------------------------|-------------|----------------------|---------------------------|-------------|------|---|------|---|-------------------------------------------|------------------|----------|
| 9 | observational studies <sup>1</sup> | not serious | serious <sup>a</sup> | very serious <sup>c</sup> | not serious | none | 0 | 4189 | - | mean 13<br>percentual points<br>(9 to 18) | ⊕○○○<br>VERY LOW | CRITICAL |
|---|------------------------------------|-------------|----------------------|---------------------------|-------------|------|---|------|---|-------------------------------------------|------------------|----------|

### Antibiotic prescription

|   |                                |             |                          |             |                      |      |                    |                    |                           |                                                 |                  |          |
|---|--------------------------------|-------------|--------------------------|-------------|----------------------|------|--------------------|--------------------|---------------------------|-------------------------------------------------|------------------|----------|
| 1 | randomised trials <sup>2</sup> | not serious | not serious <sup>d</sup> | not serious | serious <sup>e</sup> | none | 301/360<br>(83.6%) | 294/354<br>(83.1%) | OR 0.99<br>(0.57 to 1.70) | 1 fewer per 1.000<br>(from 94 fewer to 62 more) | ⊕⊕⊕○<br>MODERATE | CRITICAL |
|---|--------------------------------|-------------|--------------------------|-------------|----------------------|------|--------------------|--------------------|---------------------------|-------------------------------------------------|------------------|----------|

### Intravenous antibiotic prescription

|   |                                |             |                          |             |                      |      |                 |                 |                   |      |                                              |               |          |
|---|--------------------------------|-------------|--------------------------|-------------|----------------------|------|-----------------|-----------------|-------------------|------|----------------------------------------------|---------------|----------|
| 1 | randomised trials <sup>2</sup> | not serious | not serious <sup>d</sup> | not serious | serious <sup>e</sup> | none | 196/360 (54.4%) | 183/354 (51.7%) | OR (0.83 to 1.50) | 1.15 | 35 more per 1.000 (from 47 fewer to 99 more) | ⊕⊕⊕○ MODERATE | CRITICAL |
|---|--------------------------------|-------------|--------------------------|-------------|----------------------|------|-----------------|-----------------|-------------------|------|----------------------------------------------|---------------|----------|

#### Single dose of antibiotic

|   |                                |             |                          |             |                      |      |               |               |                   |      |                                              |               |           |
|---|--------------------------------|-------------|--------------------------|-------------|----------------------|------|---------------|---------------|-------------------|------|----------------------------------------------|---------------|-----------|
| 1 | randomised trials <sup>2</sup> | not serious | not serious <sup>d</sup> | not serious | serious <sup>f</sup> | none | 31/360 (8.6%) | 10/354 (2.8%) | OR (1.59 to 6.68) | 3.26 | 58 more per 1.000 (from 16 more to 134 more) | ⊕⊕⊕○ MODERATE | IMPORTANT |
|---|--------------------------------|-------------|--------------------------|-------------|----------------------|------|---------------|---------------|-------------------|------|----------------------------------------------|---------------|-----------|

#### Duration of antibiotic prescription

|   |                                |             |                          |             |                      |      |     |     |   |  |                                           |               |          |
|---|--------------------------------|-------------|--------------------------|-------------|----------------------|------|-----|-----|---|--|-------------------------------------------|---------------|----------|
| 1 | randomised trials <sup>2</sup> | not serious | not serious <sup>d</sup> | not serious | serious <sup>e</sup> | none | 360 | 354 | - |  | MD 0.4 days fewer (1.2 fewer to 0.4 more) | ⊕⊕⊕○ MODERATE | CRITICAL |
|---|--------------------------------|-------------|--------------------------|-------------|----------------------|------|-----|-----|---|--|-------------------------------------------|---------------|----------|

#### Length hospital stay

|   |                                |             |                          |             |                      |      |     |     |   |  |                                            |               |           |
|---|--------------------------------|-------------|--------------------------|-------------|----------------------|------|-----|-----|---|--|--------------------------------------------|---------------|-----------|
| 1 | randomised trials <sup>2</sup> | not serious | not serious <sup>d</sup> | not serious | serious <sup>f</sup> | none | 360 | 354 | - |  | MD 1.1 days fewer (2.2 fewer to 0.3 fewer) | ⊕⊕⊕○ MODERATE | IMPORTANT |
|---|--------------------------------|-------------|--------------------------|-------------|----------------------|------|-----|-----|---|--|--------------------------------------------|---------------|-----------|

**CI:** Confidence interval; **MD:** Mean difference; **OR:** Odds ratio

#### Explanations

a. Large variability between effect estimates

b. Comparison of detection rates come from different studies, not directly compared. there is uncertainty with regards to whether these positive results are false or true. Mixed population of CAP and severe CAP.

c. Detection rate not compared, there is uncertainty with regards to whether these positive results are false or true. Mixed population of CAP and severe CAP.

d. Single study, variability not considered

e. 95%CI range from clinically substantial benefit to harm

f. Low number of events, 95%CI ranges from clinical substantial benefit to futility

## Literature

- 1) Alimi, Y., et al. (2017). "Systematic review of respiratory viral pathogens identified in adults with community-acquired pneumonia in Europe." Journal of Clinical Virology 95: 26-35.
- 2) Breandish N J, Malachira A K, et al (2017) Routine molecular point-of-care testing for respiratory viruses in adults presenting to hospital with acute respiratory illness (ResPOC): a pragmatic, open-label, randomised controlled trial , Lancet Resp Med 5(5):401-411.s

## Supplementary evidence (not assessed with GRADE) (n=39)

| Pseudomonas Multiplex PCR Studies |         |          |                         |        |           |             |             |             |             |
|-----------------------------------|---------|----------|-------------------------|--------|-----------|-------------|-------------|-------------|-------------|
| (1)Study                          | Site(s) | Platform | Sample                  | Number | SOC Cases | Sensitivity | Specificity | PPV         | NPV         |
| Murphy(2)                         | Multi   | BioFire  | BAL                     | 846    | 36 (74)   | 48.6 (100)  | 100         | 100         | 95.3 (100)  |
|                                   |         |          | Sputum                  | 836    | 106 (161) | 97.2 (99.1) | 92.2 (100)  | 64.4 (100)  | 99.6 (99.8) |
| Ginocchio (3)                     | Multi   | BioFire  | BAL 1226<br>Sputum 1237 | 2463   | 316       | 96.5        | 96.3        | 79.2        | 99.5        |
| Klein (4)                         | Multi   | Unyvero  | BAL                     | 1015   | 72 (111)  | 95.8 (99.1) | 95.4 (99.8) | 61.6 (98.2) | 99.7 (99.9) |

|                  |        |             |                                                  |     |            |                |                |                    |      |
|------------------|--------|-------------|--------------------------------------------------|-----|------------|----------------|----------------|--------------------|------|
| Gastli (5)       | Multi  | BioFir<br>e | BAL<br>240,<br>ETA<br>217,<br>sputu<br>m 58      | 515 | 45         | 95.6           | 96.8           | 74.1               | 99.6 |
| Rand (6)         | Single | BioFir<br>e | BAL,<br>ETA                                      | 396 | 50<br>(61) | 98.0<br>(98.4) | 93.9<br>(97.0) | 70.4<br>(85.9<br>) | 99.7 |
| Foschi (7)       | Single | BioFir<br>e | ETA<br>178,<br>BAL52                             | 230 | 34         | 91.2           | 96.9           | 83.7               | 98.4 |
| Webber (8)       | Single | BioFir<br>e | BAL 70,<br>Sputu<br>m 130                        | 200 | 8          | 100            | 96.4           | 53.3               | 100  |
| Collins (9)      | Single | Unyv<br>ero | BAL                                              | 175 | 33         | 100            | 100            | 100                | 100  |
| Monard (10)      | Multi  | BioFir<br>e | BAL<br>34,ETA<br>71,<br>sputu<br>m 33,<br>BBS 21 | 159 | 23         | 100            | 96.3           | 82.1               | 100  |
| Camelena(11<br>) | Single | BioFir<br>e | 73<br>NBBAL,<br>63<br>sputu                      | 147 | 26         | 100            | 96.7           | 86.7               | 100  |



|                         |        |             |                                                       |     |            |      |                |                    |      |
|-------------------------|--------|-------------|-------------------------------------------------------|-----|------------|------|----------------|--------------------|------|
|                         |        |             | m, 11<br>PSB                                          |     |            |      |                |                    |      |
| Maataoui<br>(12)        | Single | BioFir<br>e | Mini-<br>BAL 77,<br>BAL 28,<br>ETA 3,<br>sputu<br>m 4 | 112 | 6          | 100  | 95.3           | 54.5               | 100  |
| Yoo (13)                | Single | BioFir<br>e | ETA 31,<br>Sputu<br>m 69                              | 99  | 19         | 100  | 88.8           | 67.8               | 100  |
| Camelena<br>(14)        | Single | BioFir<br>e | NBBAL                                                 | 96  | 14         | 100  | 100            | 100                | 100  |
| Peiffer-<br>Smadja (15) | Single | Unyv<br>ero | BAL 72,<br>PTC 23                                     | 95  | 31         | 100  | 97             | 94                 | 100  |
| Personne<br>(16)        | Two    | Unyv<br>ero | BAL 3,<br>ETA 32,<br>sputu<br>m 55                    | 90  | 13         | 100  | 92.2           | 68.4               | 100  |
| Ozongwu<br>(17)         | Single | Unyv<br>ero | BAL 1,<br>ETA 31,<br>sputu<br>m 52                    | 85  | 11<br>(12) | 100  | 83.8<br>(84.9) | 47.8<br>(52.2<br>) | 100  |
| Sun (18)                | Multi  | Unyv<br>ero | BAL                                                   | 84  | 7          | 71.4 | 94.8           | 55.6               | 97.3 |

|                                                                                                                                                                                                |        |          |                 |    |   |      |      |      |      |
|------------------------------------------------------------------------------------------------------------------------------------------------------------------------------------------------|--------|----------|-----------------|----|---|------|------|------|------|
| Lee (19)                                                                                                                                                                                       | Single | BioFirme | BAL 7<br>ETA 59 | 59 | 7 | 83.3 | 98.1 | 83.3 | 98.1 |
| Mitton(20)                                                                                                                                                                                     | Single | BioFirme | ETA             | 59 | 9 | 100  | 98   | 90   | 100  |
| (n) – after correction of false positive and negative PCRs by additional testing<br>Excluded: - unable to separate Pseudomonas cases (21-26), <5 Pseudomonas cases (27-34), children only (35) |        |          |                 |    |   |      |      |      |      |

| ESBL Detection = <i>ctxM</i> gene detection |         |          |                         |        |            |                      |                      |
|---------------------------------------------|---------|----------|-------------------------|--------|------------|----------------------|----------------------|
| Study                                       | Site(s) | Platform | Sample                  | Number | ESBL Cases | % Positive Agreement | % Negative agreement |
| Murphy (2)                                  | Multi   | BioFire  | BAL                     | 151    | 7          | 6/7 (85.7%)          | 144/144 (100%)       |
|                                             |         |          | Sputum                  | 291    | 10         | 8/10 (80%)           | 280/281 (99.6%)      |
| Ginocchio (3)                               | Multi   | BioFire  | BAL, Sputum             | 1537   | 133        | NA                   | NA                   |
| Klein (4)                                   | Multi   | Unyvero  | BAL                     | 208    | 9          | 8/9 (88.9%)          | 198/199 (99.8%)      |
| Rand (6)                                    | Single  | BioFire  | BAL, ETA                | 396    | 14         | NA                   | NA                   |
| Foschi (7)                                  | Single  | BioFire  | ETA, BAL                | NA     | 6          | 6/6 (100%)           | NA                   |
| Webber (8)                                  | Single  | BioFire  | BAL, Sputum             | 200    | 7          | 4/4 (100%)           | NA                   |
| Gadsby (24)                                 | Single  | Unyvero  | BAL                     | 30     | 8          | 8/8 (100%)           | 22/22 (100%)         |
| Monard (10)                                 | Multi   | BioFire  | BAL,ETA, sputum, BBS    | 159    | 11         | NA                   | NA                   |
| Camelena(11)                                | Single  | BioFire  | NBBAL,sputum,P SB       | NA     | 3          | 1/3 (33.3%)          | NA                   |
| Maataoui (12)                               | Single  | BioFire  | Mini-BAL,BAL,ETA,sputum | NA     | 9          | 8/9 (88.9%)          | NA                   |

|                                                                                                                                                          |        |         |                  |     |    |               |               |
|----------------------------------------------------------------------------------------------------------------------------------------------------------|--------|---------|------------------|-----|----|---------------|---------------|
| Yoo (13)                                                                                                                                                 | Single | BioFire | ETA, Sputum      | 100 | 16 | 14/16 (87.5%) | NA            |
| Camelena (14)                                                                                                                                            | Single | BioFire | NBBAL            | NA  | 2  | 1 / 2 (50%)   | NA            |
| Peiffer-Smadja (15)                                                                                                                                      | Single | Unyvero | BAL, PTC         | 48  | 5  | 5/5 (100%)    | 45/48 (93.7%) |
| Ozongwu (17)                                                                                                                                             | Single | Unyvero | BAL, ETA, sputum | 39  | 2  | 1 / 2 (50%)   | 36/37 (97.3%) |
| Zacharioudakis (32)                                                                                                                                      | Single | Biofire | Sputum           | NA  | 3  | 3/3 (100%)    | NA            |
| Lee (19)                                                                                                                                                 | Single | BioFire | BAL, ETA         | 32  | 4  | 1 / 4 (25%)   | NA            |
| Mitton(20)                                                                                                                                               | Single | BioFire | ETA              | 59  | 7  | 5/7 (71.4%)   | NA            |
| Unable to assess presence of ESBL in pathogen if culture did not grow. In mixed culture, unable to assess which Gram-negative pathogen harbors ESBL gene |        |         |                  |     |    |               |               |

| <b>S. aureus</b> |         |          |                             |        |           |             |             |            |            |
|------------------|---------|----------|-----------------------------|--------|-----------|-------------|-------------|------------|------------|
| Study            | Site(s) | Platform | Sample                      | Number | SOC Cases | Sensitivity | Specificity | PPV        | NPV        |
| Murphy(2)        | Multi   | BioFire  | BAL                         | 846    | 47 (115)  | 97.9(99.1)  | 91.2(99.9)  | 39.7(99.1) | 99.9       |
|                  |         |          | Sputum                      | 836    | 112 (205) | 99.1(99.5)  | 91.2(100)   | 54.4(100)  | 99.8       |
| Ginocchio (3)    | Multi   | BioFire  | BAL 1226<br>Sputum 1237     | 2463   | 531       | 97.1        | 82.2        | 58.1       | 99.1       |
| Klein (4)        | Multi   | Unyvero  | BAL                         | 1015   | 71 (99)   | 88.7(94.9)  | 95.7(98.9)  | 60.0(90.4) | 99.1(99.5) |
| Gastli (5)       | Multi   | BioFire  | BAL 240, ETA 217, sputum 58 | 515    | 98        | 98.0        | 88.5        | 66.7       | 99.5       |
| Rand (6)         | Single  | BioFire  | BAL, ETA                    | 396    | 45 (55)   | 100         | 85.2(87.7)  | 46.4(56.7) | 100        |
| Foschi (7)       | Single  | BioFire  | ETA 178, BAL52              | 230    | 15        | 100         | 95.3        | 60         | 100        |
| Webber (8)       | Single  | BioFire  | BAL 70,Sputum 130           | 200    | 22        | 100         | 87.6        | 50         | 100        |
| Collins (9)      | Single  | Unyvero  | BAL                         | 175    | 37        | 91.9(92.3)  | 98.5(99.3)  | 94.4(97.3) | 97.8       |
| Camelena(11)     | Single  | BioFire  | 73 NBBAL, 63 sputum, 11 PSB | 147    | 16        | 94.1        | 98.5        | 88.9       | 99.2       |

|                              |        |         |                                         |      |     |      |         |           |      |
|------------------------------|--------|---------|-----------------------------------------|------|-----|------|---------|-----------|------|
| Yoo (13)                     | Single | BioFire | ETA 31,<br>Sputum 69                    | 99   | 16  | 100  | 83.3    | 53.3      | 100  |
| Kolenda (30)                 | Three  | BioFire | 36 NBBAL,13<br>BAL, 50 ETA              | 99   | 7   | 100  | 93.5    | 53.8      | 100  |
| Camelena (14)                | Single | BioFire | NBBAL                                   | 96   | 11  | 91   | 98.8    | 91        | 98.8 |
| Peiffer-Smadja (15)          | Single | Unyvero | BAL 72, PTC 23                          | 95   | 11  | 72.7 | 100     | 100       | 96.6 |
| Tellapragada (33)            | Single | Unyvero | ETA 61,BAL<br>11,PSB 8,<br>ETA/sputum 2 | 83   | 23  | 100  | 86.7    | 74.2      | 100  |
| Zacharioudakis (32)          | Single | BioFire | Sputum                                  | 70   | 7   | 100  | 95.2    | 70        | 100  |
| Mitton(20)                   | Single | BioFire | ETA                                     | 59   | 6   | 100  | 88.7    | 50        | 100  |
| Sparks (34)                  | Single | BioFire | Sputum 27, BAL<br>12                    | 39   | 7   | 100  | 87.5    | 63.6      | 100  |
| Limited S. aureus/MRSA Assay |        |         |                                         |      |     |      |         |           |      |
| Cercenado (36)               | Single | Cepheid | ETA                                     | 135* | 105 | 99.0 | 72.2    | 90.7      | 96.3 |
| Trevino (37)                 | Single | Cepheid | BAL, ETA                                | 100  | 21  | 88.9 | 86.8    | 40        | 98.8 |
| Coppens (1)                  | Single | Cepheid | ETA                                     | 79   | 39  | 100  | 95(100) | 95.1(100) | 100  |
| Paonessa (38)                | Single | Cepheid | BAL, NBBAL                              | 247  | 48  | 95.8 | 89.9    | 69.7      | 98.9 |

\* Enriched specimens; (n) – after correction of false positive and negative PCRs by additional testing

Excluded: - unable to separate *S. aureus* cases (10, 24, 26, 39),  $\leq 5$  cases of *S. aureus* (12, 16-19, 27, 28)

| <b><i>mecA</i> detection (in studies with at least 5 cases)</b> |         |          |             |        |            |                      |                      |
|-----------------------------------------------------------------|---------|----------|-------------|--------|------------|----------------------|----------------------|
| Study                                                           | Site(s) | Platform | Sample      | Number | MRSA Cases | % Positive Agreement | % Negative agreement |
| Murphy (2)                                                      | Multi   | BioFire  | BAL         | 151    | 45         | 40/45 (88.9%)        | 64/70 (91.4%)        |
|                                                                 |         |          | Sputum      | 291    | 98         | 94/98 (95.9%)        | 91/104 (87.5%)       |
| Ginocchio (3)                                                   | Multi   | BioFire  | BAL, Sputum | 531    | 84         | 82/84 (97.6%)        | 423/447 (94.6%)      |
| Klein (4)                                                       | Multi   | Unyvero  | BAL         | 208    | 9          | 8/9 (88.9%)          | 198/199 (99.8%)      |
| Yoo (13)                                                        | Single  | BioFire  | ETA, Sputum | 100    | 16         | 14/16 (87.5%)        | NA                   |
| Rand (6)                                                        | Single  | BioFire  | BAL, ETA    | 45*    | 25         | 20/25 (80%)          | 20/20 (100%)*        |
| Foschi (7)                                                      | Single  | BioFire  | ETA, BAL    | NA     | 8          | 6/8 (80%)            | 14/17 (82.4%)        |
| Webber (8)                                                      | Single  | BioFire  | BAL, Sputum | 200    | 8          | 8/8 (100%)           | 10/14 (71.4%)*       |
| Collins (9)                                                     | Single  | Unyvero  | BAL         | 175    | 6          | 6/6 (100%)           | NA                   |
| Cercenado (36)                                                  | Single  | Cepheid  | ETA         | 135    | 43         | 43/43 (100%)         | 55/56 (98.2%)        |



|                                  |        |         |            |     |    |                  |                    |
|----------------------------------|--------|---------|------------|-----|----|------------------|--------------------|
| Trevino (37)                     | Single | Cepheid | BAL, ETA   | 100 | 6  | 5/6 (83.3%)      | 89/90<br>(98.9%)   |
| Paonessa (38)                    | Single | Cepheid | BAL, NBBAL | 247 | 23 | 22/23<br>(95.7%) | 220/224<br>(98.2%) |
| * in <i>S. aureus</i> cases only |        |         |            |     |    |                  |                    |

## Literature

1. Coppens J, Van Heirstraeten L, Ruzin A, Yu L, Timbermont L, Lammens C, Matheeußen V, McCarthy M, Jorens P, Ieven M, Kumar-Singh S, Goossens H, Malhotra-Kumar S. Comparison of GeneXpert MRSA/SA ETA assay with semi-quantitative and quantitative cultures and nuc gene-based qPCR for detection of *Staphylococcus aureus* in endotracheal aspirate samples. *Antimicrob Resist Infect Control* 2019; 8: 4.
2. Murphy CN, Fowler R, Balada-Llasat JM, Carroll A, Stone H, Akerele O, Buchan B, Windham S, Hopp A, Ronen S, Relich RF, Buckner R, Warren DA, Humphries R, Campeau S, Huse H, Chandrasekaran S, Leber A, Everhart K, Harrington A, Kwong C, Bonwit A, Dien Bard J, Naccache S, Zimmerman C, Jones B, Rindlisbacher C, Buccambuso M, Clark A, Rogatcheva M, Graue C, Bourzac KM. Multicenter Evaluation of the BioFire FilmArray Pneumonia/Pneumonia Plus Panel for Detection and Quantification of Agents of Lower Respiratory Tract Infection. *J Clin Microbiol* 2020; 58.
3. Ginocchio CC, Garcia-Mondragon C, Mauerhofer B, Rindlisbacher C, and the EMEPEC. Multinational evaluation of the BioFire(R) FilmArray(R) Pneumonia plus Panel as compared to standard of care testing. *Eur J Clin Microbiol Infect Dis* 2021.
4. Klein M, Bacher J, Barth S, Atrazadeh F, Siebenhaller K, Ferreira I, Beisken S, Posch AE, Carroll KC, Wunderink RG, Qi C, Wu F, Hardy DJ, Patel R, Sims MD. Multicenter Evaluation of the Unyvero Platform for Testing Bronchoalveolar Lavage Fluid. *J Clin Microbiol* 2021; 59.
5. Gastli N, Loubinoux J, Daragon M, Lavigne JP, Saint-Sardos P, Pailhories H, Lemarie C, Benmansour H, d'Humieres C, Broutin L, Dauwalder O, Levy M, Auger G, Kerneis S, Cattoir V, French FAPPSg. Multicentric evaluation of BioFire FilmArray Pneumonia Panel for rapid bacteriological documentation of pneumonia. *Clin Microbiol Infect* 2020.
6. Rand KH, Beal SG, Cherabuddi K, Couturier B, Lingenfelter B, Rindlisbacher C, Jones J, Houck HJ, Lessard KJ, Tremblay EE. Performance of a Semiquantitative Multiplex Bacterial and Viral PCR Panel Compared With Standard Microbiological Laboratory Results: 396 Patients Studied With the BioFire Pneumonia Panel. *Open Forum Infect Dis* 2021; 8: ofaa560.
7. Foschi C, Zignoli A, Gaibani P, Vocale C, Rossini G, Lafratta S, Liberatore A, Turello G, Lazzarotto T, Ambretti S. Respiratory bacterial co-infections in intensive care unit-hospitalized COVID-19 patients: Conventional culture vs BioFire FilmArray pneumonia Plus panel. *J Microbiol Methods* 2021; 186: 106259.
8. Webber DM, Wallace MA, Burnham CA, Anderson NW. Evaluation of the BioFire FilmArray Pneumonia Panel for Detection of Viral and Bacterial Pathogens in Lower Respiratory Tract Specimens in the Setting of a Tertiary Care Academic Medical Center. *J Clin Microbiol* 2020; 58.
9. Collins ME, Popowitch EB, Miller MB. Evaluation of a Novel Multiplex PCR Panel Compared to Quantitative Bacterial Culture for Diagnosis of Lower Respiratory Tract Infections. *J Clin Microbiol* 2020; 58.
10. Monard C, Pehlivan J, Auger G, Alviset S, Tran Dinh A, Duquaire P, Gastli N, d'Humieres C, Maamar A, Boibieux A, Baldeyrou M, Loubinoux J, Dauwalder O, Cattoir V, Armand-Lefevre L, Kerneis S, group As. Multicenter evaluation of a syndromic rapid multiplex PCR test for early adaptation of antimicrobial therapy in adult patients with pneumonia. *Crit Care* 2020; 24: 434.

11. Camelena F, Poncin T, Dudoignon E, Salmona M, Le Goff J, Donay JL, Lafaurie M, Darmon M, Azoulay E, Plaud B, Mebazaa A, Depret F, Jacquier H, Bercot B. Recent agreement; NPA: negative percent agreeRapid identification of bacteria from respiratory samples of patients hospitalized in intensive care units, with FilmArray Pneumonia Panel Plus. *Int J Infect Dis* 2021.
12. Maataoui N, Chemali L, Patrier J, Tran Dinh A, Le Fevre L, Lortat-Jacob B, Marzouk M, d'Humieres C, Rondinaud E, Ruppe E, Montravers P, Timsit JF, Armand-Lefevre L. Impact of rapid multiplex PCR on management of antibiotic therapy in COVID-19-positive patients hospitalized in intensive care unit. *Eur J Clin Microbiol Infect Dis* 2021.
13. Yoo IY, Huh K, Shim HJ, Yun SA, Chung YN, Kang OK, Huh HJ, Lee NY. Evaluation of the BioFire FilmArray Pneumonia Panel for rapid detection of respiratory bacterial pathogens and antibiotic resistance genes in sputum and endotracheal aspirate specimens. *Int J Infect Dis* 2020; 95: 326-331.
14. Camelena F, Moy AC, Dudoignon E, Poncin T, Deniau B, Guillemet L, Le Goff J, Budoo M, Benyamina M, Chaussard M, Coutrot M, Lafaurie M, Plaud B, Mebazaa A, Depret F, Bercot B. Performance of a multiplex polymerase chain reaction panel for identifying bacterial pathogens causing pneumonia in critically ill patients with COVID-19. *Diagn Microbiol Infect Dis* 2021; 99: 115183.
15. Peiffer-Smadja N, Bouadma L, Mathy V, Allouche K, Patrier J, Reboul M, Montravers P, Timsit JF, Armand-Lefevre L. Performance and impact of a multiplex PCR in ICU patients with ventilator-associated pneumonia or ventilated hospital-acquired pneumonia. *Crit Care* 2020; 24: 366.
16. Personne Y, Ozongwu C, Platt G, Basurto-Lozada P, Shamin M, Gant VA, Zumla A, Enne VI. 'Sample-in, answer-out'? Evaluation and comprehensive analysis of the Unyvero P50 pneumonia assay. *Diagn Microbiol Infect Dis* 2016; 86: 5-10.
17. Ozongwu C, Personne Y, Platt G, Jeanes C, Aydin S, Kozato N, Gant V, O'Grady J, Enne VI. The Unyvero P55 'sample-in, answer-out' pneumonia assay: A performance evaluation. *Biomol Detect Quantif* 2017; 13: 1-6.
18. Sun L, Li L, Du S, Liu Y, Cao B. An evaluation of the Unyvero pneumonia system for rapid detection of microorganisms and resistance markers of lower respiratory infections-a multicenter prospective study on ICU patients. *Eur J Clin Microbiol Infect Dis* 2021.
19. Lee SH, Ruan SY, Pan SC, Lee TF, Chien JY, Hsueh PR. Performance of a multiplex PCR pneumonia panel for the identification of respiratory pathogens and the main determinants of resistance from the lower respiratory tract specimens of adult patients in intensive care units. *J Microbiol Immunol Infect* 2019; 52: 920-928.
20. Mitton B, Rule R, Said M. Laboratory evaluation of the BioFire FilmArray Pneumonia plus panel compared to conventional methods for the identification of bacteria in lower respiratory tract specimens: a prospective cross-sectional study from South Africa. *Diagn Microbiol Infect Dis* 2021; 99: 115236.
21. Luyt CE, Hekimian G, Bonnet I, Brechot N, Schmidt M, Robert J, Combes A, Aubry A. Usefulness of point-of-care multiplex PCR to rapidly identify pathogens responsible for ventilator-associated pneumonia and their resistance to antibiotics: an observational study. *Crit Care* 2020; 24: 378.

22. Kunze N, Moerer O, Steinmetz N, Schulze MH, Quintel M, Perl T. Point-of-care multiplex PCR promises short turnaround times for microbial testing in hospital-acquired pneumonia--an observational pilot study in critical ill patients. *Ann Clin Microbiol Antimicrob* 2015; 14: 33.
23. Yugueros-Marcos J, Barraud O, Iannello A, Ploy MC, Ginocchio C, Rogatcheva M, Alberti-Segui C, Pachot A, Moucadel V, Francois B, group Vs. New molecular semi-quantification tool provides reliable microbiological evidence for pulmonary infection. *Intensive Care Med* 2018; 44: 2302-2304.
24. Gadsby NJ, McHugh MP, Forbes C, MacKenzie L, Hamilton SKD, Griffith DM, Templeton KE. Comparison of Unyvero P55 Pneumonia Cartridge, in-house PCR and culture for the identification of respiratory pathogens and antibiotic resistance in bronchoalveolar lavage fluids in the critical care setting. *Eur J Clin Microbiol Infect Dis* 2019; 38: 1171-1178.
25. Gilbert DN, Leggett JE, Wang L, Ferdosian S, Gelfer GD, Johnston ML, Footer BW, Hendrickson KW, Park HS, White EE, Heffner J. Enhanced Detection of Community-Acquired Pneumonia Pathogens With the BioFire(R) Pneumonia FilmArray(R) Panel. *Diagn Microbiol Infect Dis* 2021; 99: 115246.
26. Kyriazopoulou E, Karageorgos A, Liaskou-Antoniou L, Koufargyris P, Safarika A, Damoraki G, Lekakis V, Saridaki M, Adamis G, Giamarellos-Bourboulis EJ. BioFire((R)) FilmArray((R)) Pneumonia Panel for Severe Lower Respiratory Tract Infections: Subgroup Analysis of a Randomized Clinical Trial. *Infect Dis Ther* 2021.
27. Edin A, Eilers H, Allard A. Evaluation of the Biofire Filmarray Pneumonia panel plus for lower respiratory tract infections. *Infect Dis (Lond)* 2020; 52: 479-488.
28. Jamal W, Al Roomi E, AbdulAziz LR, Rotimi VO. Evaluation of Curetis Unyvero, a multiplex PCR-based testing system, for rapid detection of bacteria and antibiotic resistance and impact of the assay on management of severe nosocomial pneumonia. *J Clin Microbiol* 2014; 52: 2487-2492.
29. Verroken A, Scohy A, Gerard L, Wittebole X, Collienne C, Laterre PF. Co-infections in COVID-19 critically ill and antibiotic management: a prospective cohort analysis. *Crit Care* 2020; 24: 410.
30. Kolenda C, Ranc AG, Boisset S, Caspar Y, Carricajo A, Souche A, Dauwalder O, Verhoeven PO, Vandenesch F, Laurent F. Assessment of Respiratory Bacterial Coinfections Among Severe Acute Respiratory Syndrome Coronavirus 2-Positive Patients Hospitalized in Intensive Care Units Using Conventional Culture and BioFire, FilmArray Pneumonia Panel Plus Assay. *Open Forum Infect Dis* 2020; 7: ofaa484.
31. Hoover J, Mintz MA, Deiter F, Aminian E, Chen J, Hays SR, Singer JP, Calabrese DR, Kukreja J, Greenland JR. Rapid molecular detection of airway pathogens in lung transplant recipients. *Transpl Infect Dis* 2021: e13579.
32. Zacharioudakis IM, Zervou FN, Dubrovskaya Y, Inglima K, See B, Agüero-Rosenfeld M. Evaluation of a Multiplex PCR Panel for the Microbiological Diagnosis of Pneumonia in Hospitalized Patients: Experience from an Academic Medical Center. *Int J Infect Dis* 2021; 104: 354-360.
33. Tellapragada C, Giske CG. The Unyvero Hospital-Acquired pneumonia panel for diagnosis of secondary bacterial pneumonia in COVID-19 patients. *Eur J Clin Microbiol Infect Dis* 2021.

34. Sparks R, Balgahom R, Janto C, Polkinghorne A, Branley J. Verification of the BioFire FilmArray Pneumonia Plus Panel for pathogen screening of respiratory specimens. *Pathology* 2021.
35. Papan C, Meyer-Buehn M, Laniado G, Nicolai T, Griesse M, Huebner J. Assessment of the multiplex PCR-based assay Unyvero pneumonia application for detection of bacterial pathogens and antibiotic resistance genes in children and neonates. *Infection* 2018; 46: 189-196.
36. Cercenado E, Marin M, Burillo A, Martin-Rabadan P, Rivera M, Bouza E. Rapid detection of *Staphylococcus aureus* in lower respiratory tract secretions from patients with suspected ventilator-associated pneumonia: evaluation of the Cepheid Xpert MRSA/SA SSTI assay. *J Clin Microbiol* 2012; 50: 4095-4097.
37. Trevino SE, Pence MA, Marschall J, Kollef MH, Babcock HM, Burnham CD. Rapid MRSA PCR on respiratory specimens from ventilated patients with suspected pneumonia: a tool to facilitate antimicrobial stewardship. *Eur J Clin Microbiol Infect Dis* 2017; 36: 879-885.
38. Paonessa JR, Shah RD, Pickens CI, Lizza BD, Donnelly HK, Malczynski M, Qi C, Wunderink RG. Rapid Detection of Methicillin-Resistant *Staphylococcus aureus* in BAL: A Pilot Randomized Controlled Trial. *Chest* 2019.

## Evidence to Decisions (EtD) framework

**Question 1. In patients with sCAP should rapid microbiologic techniques be added to current testing of blood and respiratory tract samples?**

**POPULATION:**

Adult patients with severe CAP

**INTERVENTION:**

Use of mono- or multiplex-polymerase chain reaction (PCR) assays to determine etiology of SCAP

### Test accuracy

How accurate are PCRs for diagnosis of etiology in SCAP?

| JUDGEMENT                                                                                                                                                                                    | RESEARCH EVIDENCE                                                                                                                                                            | ADDITIONAL CONSIDERATIONS                                                                                                                                                                                                                                                                          |
|----------------------------------------------------------------------------------------------------------------------------------------------------------------------------------------------|------------------------------------------------------------------------------------------------------------------------------------------------------------------------------|----------------------------------------------------------------------------------------------------------------------------------------------------------------------------------------------------------------------------------------------------------------------------------------------------|
| <ul style="list-style-type: none"> <li>○ Very inaccurate</li> <li>○ Inaccurate</li> <li>○ Accurate</li> <li>○ <b><u>Very accurate</u></b></li> <li>○ Varies</li> <li>○ Don't know</li> </ul> | <p>PCR has high sensitivity (0.71 to 1.0) and high specificity (0.72 to 1.00) for the diagnosis of CAP etiology.</p> <p>Negative predictive value &gt;95% in all studies</p> | <p>No true gold standard against which results of PCR can be compared.</p> <p>Sensitivity and specificity only assessed for pathogens on panel.</p> <p>Majority of evidence for false positive PCR compared with culture suggests false negative culture rather than false positive PCR (1-4).</p> |

### Desirable Effects

How substantial are the desirable anticipated effects of PCR testing for SCAP etiology?

| JUDGEMENT                                                                                                                                                               | RESEARCH EVIDENCE                                                                                                                                                                                                                            | ADDITIONAL CONSIDERATIONS                                                                                                                                                         |
|-------------------------------------------------------------------------------------------------------------------------------------------------------------------------|----------------------------------------------------------------------------------------------------------------------------------------------------------------------------------------------------------------------------------------------|-----------------------------------------------------------------------------------------------------------------------------------------------------------------------------------|
| <ul style="list-style-type: none"> <li>○ Trivial</li> <li>○ Small</li> <li>○ <b><u>Moderate</u></b></li> <li>○ Large</li> <li>○ Varies</li> <li>○ Don't know</li> </ul> | <p>Multiplex PCRs will detect many pathogens routinely covered by usual CAP antibiotics. However, high negative predictive value potentially allows discontinuation of broad spectrum antibiotics when resistant pathogens are suspected</p> | <p>Lack of susceptibility markers for many pathogens/resistance mechanisms can limit narrowing of antibiotic therapy. However, detection of resistance genes highly reliable.</p> |

### Undesirable Effects

How substantial are the undesirable anticipated effects of PCR testing for SCAP etiology?

| JUDGEMENT | RESEARCH EVIDENCE | ADDITIONAL CONSIDERATIONS |
|-----------|-------------------|---------------------------|
|           |                   |                           |

|                                                                                                                                                                                                                                                                                                                       |                                                                                                                                                                                        |                                                                                                                                                                                                                  |
|-----------------------------------------------------------------------------------------------------------------------------------------------------------------------------------------------------------------------------------------------------------------------------------------------------------------------|----------------------------------------------------------------------------------------------------------------------------------------------------------------------------------------|------------------------------------------------------------------------------------------------------------------------------------------------------------------------------------------------------------------|
| <ul style="list-style-type: none"> <li>○ Large</li> <li>○ Moderate</li> <li>○ <b>Small</b></li> <li>○ Trivial</li> <li>○ Varies</li> <li>○ Don't know</li> </ul>                                                                                                                                                      | Inappropriate narrowing of antibiotics for pathogens or resistance mechanisms not on multiplex panel risks adverse outcomes. Significantly less likely for SCAP than for HAP/VAP       |                                                                                                                                                                                                                  |
| <b>Certainty of the evidence of test accuracy</b><br>What is the overall certainty of the evidence of accuracy for PCR testing for SCAP etiology?                                                                                                                                                                     |                                                                                                                                                                                        |                                                                                                                                                                                                                  |
| JUDGEMENT                                                                                                                                                                                                                                                                                                             | RESEARCH EVIDENCE                                                                                                                                                                      | ADDITIONAL CONSIDERATIONS                                                                                                                                                                                        |
| <ul style="list-style-type: none"> <li>○ Very low</li> <li>○ Low</li> <li>○ Moderate</li> <li>○ High but variable</li> <li>○ No included studies</li> </ul>                                                                                                                                                           | Not formally rated with GRADE.<br><br>The certainty of the evidence of test accuracy varies by pathogen and type of specimen.                                                          | Timing of sample acquisition likely to have an effect although less than for cultures. Multiplex technology may result in less than optimal PCR conditions for each pathogen                                     |
| <b>Certainty of the evidence of for PCR testing for SCAP etiology test result/management</b><br>How certain is the link between test results and management decisions?                                                                                                                                                |                                                                                                                                                                                        |                                                                                                                                                                                                                  |
| JUDGEMENT                                                                                                                                                                                                                                                                                                             | RESEARCH EVIDENCE                                                                                                                                                                      | ADDITIONAL CONSIDERATIONS                                                                                                                                                                                        |
| <ul style="list-style-type: none"> <li>○ <b>Very low</b></li> <li>○ Low</li> <li>○ Moderate</li> <li>○ High</li> <li>○ No included studies</li> </ul>                                                                                                                                                                 | One true RCT of limited PCR (MRSA only) demonstrates safety of withholding antibiotic based on result.                                                                                 | Multiple studies implying changes in therapy but not mandated and not algorithmic                                                                                                                                |
| <b>Balance of effects</b><br>Does the balance between desirable and undesirable effects favor for PCR testing for SCAP etiology or conventional culture-based testing only?                                                                                                                                           |                                                                                                                                                                                        |                                                                                                                                                                                                                  |
| JUDGEMENT                                                                                                                                                                                                                                                                                                             | RESEARCH EVIDENCE                                                                                                                                                                      | ADDITIONAL CONSIDERATIONS                                                                                                                                                                                        |
| <ul style="list-style-type: none"> <li>○ Favors the comparison</li> <li>○ Probably favors the comparison</li> <li>○ Does not favor either the intervention or the comparison</li> <li>○ Probably favors the intervention</li> <li>○ <b>Favors the intervention</b></li> <li>○ Varies</li> <li>○ Don't know</li> </ul> | Detection of unsuspected pathogens and ability to de-escalate specific antibiotics favour PCR testing. Adverse effects of stopping antibiotics based on negative multiplex PCR unknown | Limited number of pathogens on any multiplex PCR platform still raises uncertainty for rare pathogens that might respond to prescribed antibiotics<br><br>Cost implications may limit widespread implementation. |
| <b>Resources required</b><br>How large are the resource requirements (costs)?                                                                                                                                                                                                                                         |                                                                                                                                                                                        |                                                                                                                                                                                                                  |

| JUDGEMENT                                                                                                                                                                                                                             | RESEARCH EVIDENCE                        | ADDITIONAL CONSIDERATIONS                                                                                                                                                                                                                                                                                                                                                                       |
|---------------------------------------------------------------------------------------------------------------------------------------------------------------------------------------------------------------------------------------|------------------------------------------|-------------------------------------------------------------------------------------------------------------------------------------------------------------------------------------------------------------------------------------------------------------------------------------------------------------------------------------------------------------------------------------------------|
| <ul style="list-style-type: none"> <li>○ Large costs</li> <li>○ <b>Moderate costs</b></li> <li>○ Negligible costs and savings</li> <li>○ Moderate savings</li> <li>○ Large savings</li> <li>○ Varies</li> <li>○ Don't know</li> </ul> | No clear cost benefit analysis available | <p>Moderate cost for diagnostic platform but many institutions may have purchased previously for other multiplex PCR panels</p> <p>Per test cost moderate but clearly greater than for culture based diagnosis. Cost of avoiding antibiotics, antibiotic side effects, and appropriate escalation of therapy make this financial assessment difficult.</p>                                      |
| <b>Equity</b><br>What would be the impact on health equity?                                                                                                                                                                           |                                          |                                                                                                                                                                                                                                                                                                                                                                                                 |
| JUDGEMENT                                                                                                                                                                                                                             | RESEARCH EVIDENCE                        | ADDITIONAL CONSIDERATIONS                                                                                                                                                                                                                                                                                                                                                                       |
| <ul style="list-style-type: none"> <li>○ Reduced</li> <li>○ Probably reduced</li> <li>○ Probably no impact</li> <li>○ <b>Probably increased</b></li> <li>○ Increased</li> <li>○ Varies</li> <li>○ Don't know</li> </ul>               | No data                                  | <p>Because of additional costs of equipment and per test, less likely to be available in resource constrained settings, potentially leading to increased health disparity</p>                                                                                                                                                                                                                   |
| <b>Acceptability</b><br>Is PCR testing for SCAP etiology acceptable to key stakeholders?                                                                                                                                              |                                          |                                                                                                                                                                                                                                                                                                                                                                                                 |
| JUDGEMENT                                                                                                                                                                                                                             | RESEARCH EVIDENCE                        | ADDITIONAL CONSIDERATIONS                                                                                                                                                                                                                                                                                                                                                                       |
| <ul style="list-style-type: none"> <li>○ No</li> <li>○ Probably no</li> <li>○ Probably yes</li> <li>○ Yes</li> <li>○ <b>Varies</b></li> <li>○ Don't know</li> </ul>                                                                   | No data                                  | <p>Lay people likely to favour more accurate diagnosis and fewer antibiotics.</p> <p>Strong endorsement by antibiotic stewardship teams and clinicians.</p> <p>Hospital administrators and laboratory managers may be challenged by additional costs, especially if clinical decisions are not based on results.</p> <p>Acceptance may vary depending on resources and healthcare settings.</p> |
| <b>Feasibility</b><br>Is PCR testing for SCAP etiology feasible to implement?                                                                                                                                                         |                                          |                                                                                                                                                                                                                                                                                                                                                                                                 |
| JUDGEMENT                                                                                                                                                                                                                             | RESEARCH EVIDENCE                        | ADDITIONAL CONSIDERATIONS                                                                                                                                                                                                                                                                                                                                                                       |



|                                                                                                                                                                                                                 |           |                                                                                     |                                                                                                                              |
|-----------------------------------------------------------------------------------------------------------------------------------------------------------------------------------------------------------------|-----------|-------------------------------------------------------------------------------------|------------------------------------------------------------------------------------------------------------------------------|
| <input type="radio"/> No<br><input type="radio"/> Probably<br><input type="radio"/> Probably<br><input type="radio"/> Yes<br><input checked="" type="radio"/> <u>Varies</u><br><input type="radio"/> Don't know | no<br>yes | Multiple studies of rapid PCR for blood cultures and antibiotic stewardship efforts | Very feasible, especially if platform already available in institution. Turnaround time and notifications may be a challenge |
|-----------------------------------------------------------------------------------------------------------------------------------------------------------------------------------------------------------------|-----------|-------------------------------------------------------------------------------------|------------------------------------------------------------------------------------------------------------------------------|

#### TYPE OF RECOMMENDATION

|                                                                             |                                                                                  |                                                                                                       |                                                                                                |                                                                         |
|-----------------------------------------------------------------------------|----------------------------------------------------------------------------------|-------------------------------------------------------------------------------------------------------|------------------------------------------------------------------------------------------------|-------------------------------------------------------------------------|
| Strong recommendation against the intervention<br><br><input type="radio"/> | Conditional recommendation against the intervention<br><br><input type="radio"/> | Conditional recommendation for either the intervention or the comparison<br><br><input type="radio"/> | <u>Conditional recommendation for the intervention</u><br><br><input checked="" type="radio"/> | Strong recommendation for the intervention<br><br><input type="radio"/> |
|-----------------------------------------------------------------------------|----------------------------------------------------------------------------------|-------------------------------------------------------------------------------------------------------|------------------------------------------------------------------------------------------------|-------------------------------------------------------------------------|

#### CONCLUSIONS

##### Recommendation

*If the technology is available, we suggest sending a lower respiratory tract (LRT) sample (either sputum or endotracheal aspirates) for multiplex PCR testing (virus and/or bacterial detection) whenever non-standard sCAP antibiotics are prescribed or considered (conditional recommendation, very low quality of evidence).*

Question 2. In hypoxemic patients with sCAP, can either non-invasive mechanical ventilation (NIV) or high-flow nasal oxygen (HFNC) be used initially—rather than supplemental standard oxygen administration—to avoid intubation and reduce mortality?

#### PRISMA Flow Diagram

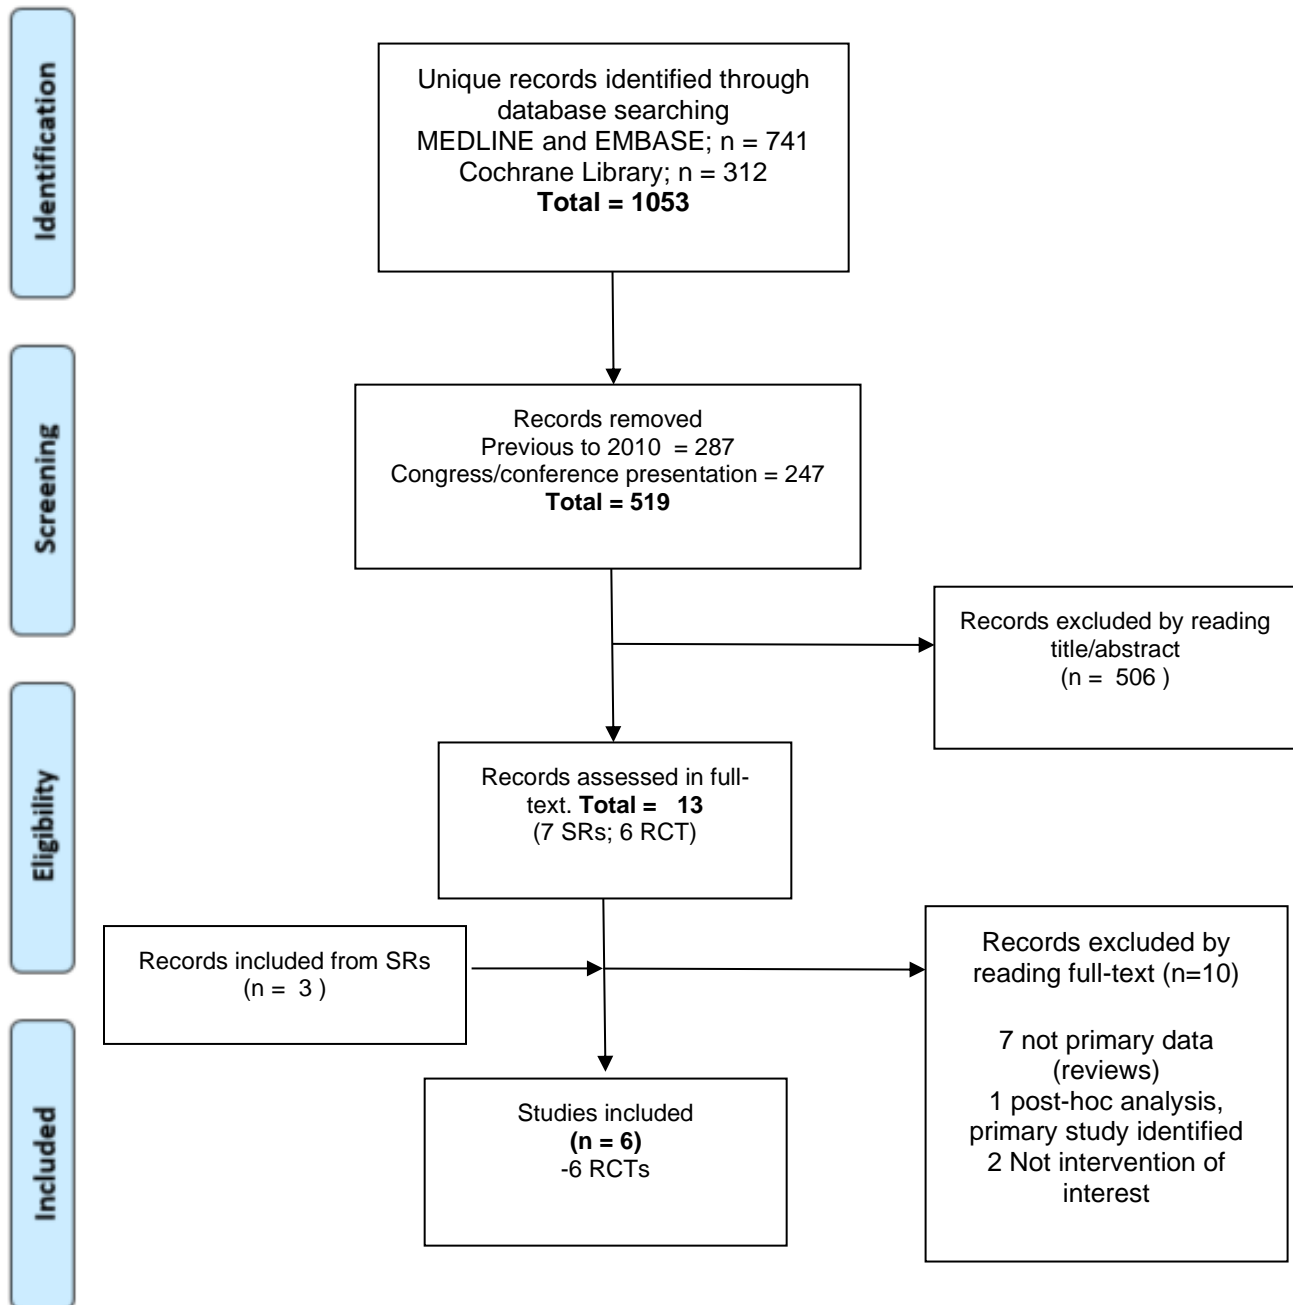

From: Moher D, Liberati A, Tetzlaff J, Altman DG, The PRISMA Group (2009). Preferred Reporting Items for Systematic Reviews and Meta-Analyses: The PRISMA Statement. PLoS Med 6(7): e1000097. doi:10.1371/journal.pmed1000097

For more information, visit [www.prisma-statement.org](http://www.prisma-statement.org).

## Forest Plots

### Intubation

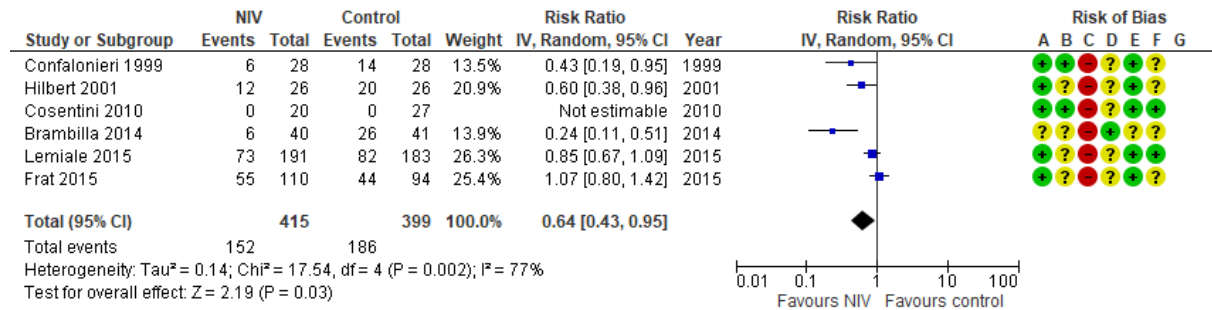

### Mortality (ICU mortality, hospital mortality, 28 days mortality, 90 days, 6 months mortality)

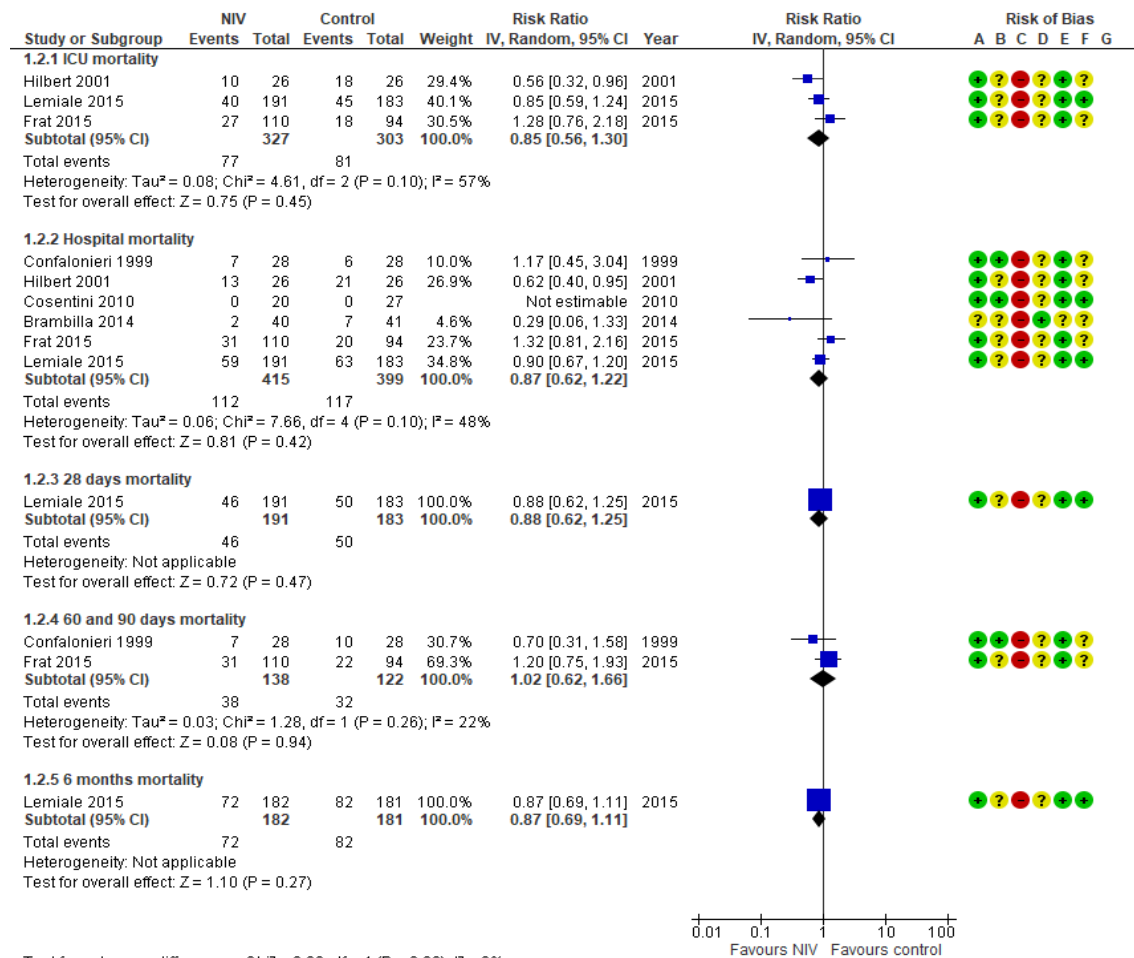

Test for subgroup differences:  $\chi^2 = 0.38$ ,  $df = 4$  ( $P = 0.98$ ),  $I^2 = 0\%$

#### Risk of bias legend

- (A) Random sequence generation (selection bias)
- (B) Allocation concealment (selection bias)
- (C) Blinding of participants and personnel (performance bias)
- (D) Blinding of outcome assessment (detection bias)
- (E) Incomplete outcome data (attrition bias)
- (F) Selective reporting (reporting bias)
- (G) Other bias

## Forest plots: HFNO vs standard therapy

### Intubation

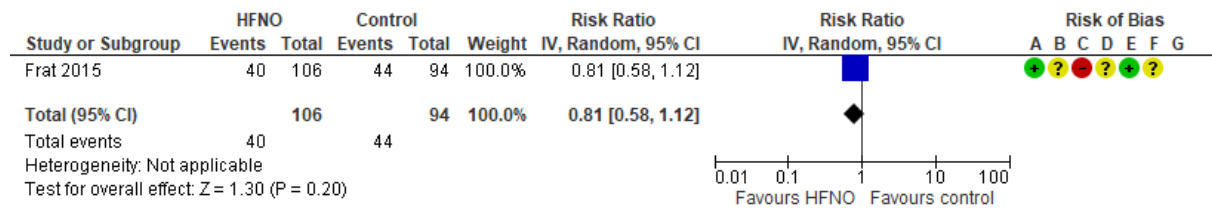

#### Risk of bias legend

- (A) Random sequence generation (selection bias)
- (B) Allocation concealment (selection bias)
- (C) Blinding of participants and personnel (performance bias)
- (D) Blinding of outcome assessment (detection bias)
- (E) Incomplete outcome data (attrition bias)
- (F) Selective reporting (reporting bias)
- (G) Other bias

### Mortality (ICU mortality, hospital mortality, 90 days mortality)

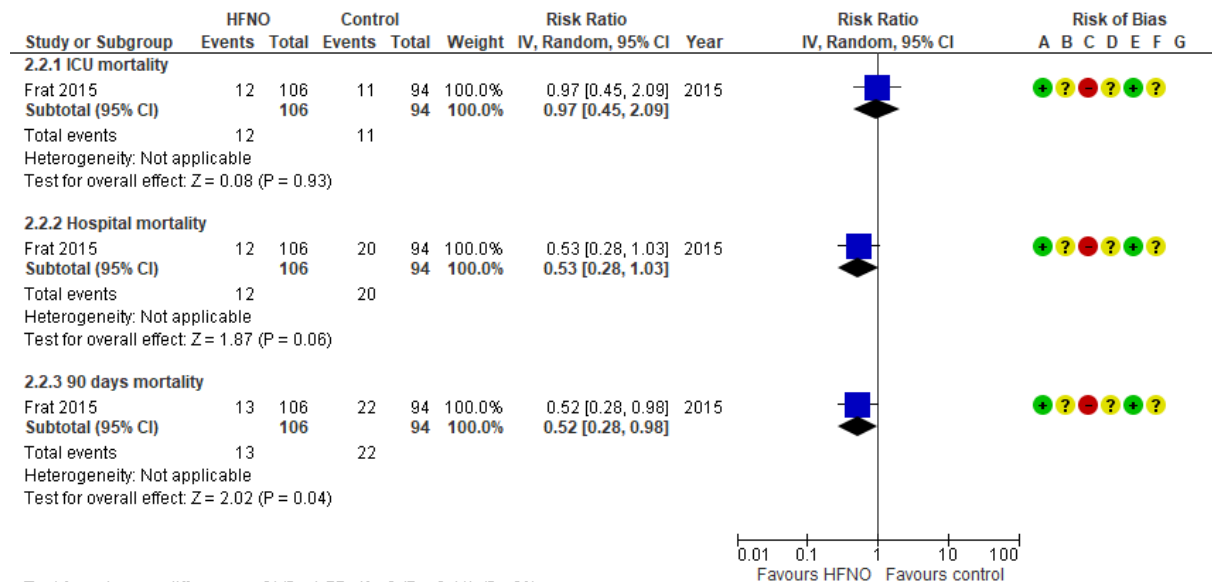

Test for subgroup differences: Chi² = 1.77, df = 2 (P = 0.41), I² = 0%

#### Risk of bias legend

- (A) Random sequence generation (selection bias)
- (B) Allocation concealment (selection bias)
- (C) Blinding of participants and personnel (performance bias)
- (D) Blinding of outcome assessment (detection bias)
- (E) Incomplete outcome data (attrition bias)
- (F) Selective reporting (reporting bias)
- (G) Other bias

## Evidence profile: NIV vs conventional oxygen.

**Study setting:** Adults with sCAP admitted for inpatient treatment in different countries (Italy, France, Belgium).

| Certainty assessment |              |              |               |              |             |                      | No of patients |                     | Effect            |                   | Certainty | Importance |
|----------------------|--------------|--------------|---------------|--------------|-------------|----------------------|----------------|---------------------|-------------------|-------------------|-----------|------------|
| No of studies        | Study design | Risk of bias | Inconsistency | Indirectness | Imprecision | Other considerations | NIV            | conventional oxygen | Relative (95% CI) | Absolute (95% CI) |           |            |

### Intubation at 28 days

|   |                                          |                             |             |             |             |      |                 |                 |                               |                                                         |             |          |
|---|------------------------------------------|-----------------------------|-------------|-------------|-------------|------|-----------------|-----------------|-------------------------------|---------------------------------------------------------|-------------|----------|
| 6 | randomised trials <sup>1,2,3,4,5,6</sup> | very serious <sup>a,b</sup> | not serious | not serious | not serious | none | 152/415 (36.6%) | 186/399 (46.6%) | <b>RR 0.64</b> (0.43 to 0.95) | <b>168 fewer per 1,000</b> (from 266 fewer to 23 fewer) | ⊕⊕○○<br>Low | CRITICAL |
|---|------------------------------------------|-----------------------------|-------------|-------------|-------------|------|-----------------|-----------------|-------------------------------|---------------------------------------------------------|-------------|----------|

### Mortality - ICU mortality

|   |                                    |             |             |             |                      |      |                |                |                               |                                                       |                  |          |
|---|------------------------------------|-------------|-------------|-------------|----------------------|------|----------------|----------------|-------------------------------|-------------------------------------------------------|------------------|----------|
| 3 | randomised trials <sup>2,5,6</sup> | not serious | not serious | not serious | serious <sup>c</sup> | none | 77/327 (23.5%) | 81/303 (26.7%) | <b>RR 0.85</b> (0.56 to 1.30) | <b>40 fewer per 1,000</b> (from 118 fewer to 80 more) | ⊕⊕⊕○<br>Moderate | CRITICAL |
|---|------------------------------------|-------------|-------------|-------------|----------------------|------|----------------|----------------|-------------------------------|-------------------------------------------------------|------------------|----------|

### Mortality - Hospital mortality

| Certainty assessment |                                          |              |               |              |                      |                      | No of patients  |                     | Effect                           |                                                          | Certainty        | Importance |
|----------------------|------------------------------------------|--------------|---------------|--------------|----------------------|----------------------|-----------------|---------------------|----------------------------------|----------------------------------------------------------|------------------|------------|
| No of studies        | Study design                             | Risk of bias | Inconsistency | Indirectness | Imprecision          | Other considerations | NIV             | conventional oxygen | Relative (95% CI)                | Absolute (95% CI)                                        |                  |            |
| 6                    | randomised trials <sup>1,2,3,4,5,6</sup> | not serious  | not serious   | not serious  | serious <sup>c</sup> | none                 | 112/415 (27.0%) | 117/399 (29.3%)     | <b>RR 0.87</b><br>(0.62 to 1.22) | <b>38 fewer per 1,000</b><br>(from 111 fewer to 65 more) | ⊕⊕⊕○<br>Moderate | CRITICAL   |

#### Mortality - 28 days mortality

|   |                                |             |             |             |                      |      |                |                |                                  |                                                          |                  |          |
|---|--------------------------------|-------------|-------------|-------------|----------------------|------|----------------|----------------|----------------------------------|----------------------------------------------------------|------------------|----------|
| 1 | randomised trials <sup>6</sup> | not serious | not serious | not serious | serious <sup>c</sup> | none | 46/191 (24.1%) | 50/183 (27.3%) | <b>RR 0.88</b><br>(0.62 to 1.25) | <b>33 fewer per 1,000</b><br>(from 104 fewer to 68 more) | ⊕⊕⊕○<br>Moderate | CRITICAL |
|---|--------------------------------|-------------|-------------|-------------|----------------------|------|----------------|----------------|----------------------------------|----------------------------------------------------------|------------------|----------|

#### Mortality - 60 and 90 days mortality

|   |                                  |             |             |             |                      |      |                |                |                                  |                                                         |                  |          |
|---|----------------------------------|-------------|-------------|-------------|----------------------|------|----------------|----------------|----------------------------------|---------------------------------------------------------|------------------|----------|
| 2 | randomised trials <sup>1,5</sup> | not serious | not serious | not serious | serious <sup>c</sup> | none | 38/138 (27.5%) | 32/122 (26.2%) | <b>RR 1.02</b><br>(0.62 to 1.66) | <b>5 more per 1,000</b><br>(from 100 fewer to 173 more) | ⊕⊕⊕○<br>Moderate | CRITICAL |
|---|----------------------------------|-------------|-------------|-------------|----------------------|------|----------------|----------------|----------------------------------|---------------------------------------------------------|------------------|----------|

#### Mortality - 6 months mortality

| Certainty assessment |                                |              |               |              |                      |                      | No of patients |                     | Effect                        |                                                       | Certainty     | Importance |
|----------------------|--------------------------------|--------------|---------------|--------------|----------------------|----------------------|----------------|---------------------|-------------------------------|-------------------------------------------------------|---------------|------------|
| No of studies        | Study design                   | Risk of bias | Inconsistency | Indirectness | Imprecision          | Other considerations | NIV            | conventional oxygen | Relative (95% CI)             | Absolute (95% CI)                                     |               |            |
| 1                    | randomised trials <sup>6</sup> | not serious  | not serious   | not serious  | serious <sup>c</sup> | none                 | 72/182 (39.6%) | 82/181 (45.3%)      | <b>RR 0.87</b> (0.69 to 1.11) | <b>59 fewer per 1,000</b> (from 140 fewer to 50 more) | ⊕⊕⊕○ Moderate | CRITICAL   |

CI: confidence interval; RR: risk ratio

### Explanations

- Due to the nature of the intervention, blinding was not feasible (i.e. all information is from studies at high risk of bias). Additionally, decision to intubate is inherently subjective, even though predefined intubation criteria may alleviate this subjectivity to some extent. Therefore, there is high risk of performance bias.
- 26 patients (6.5%) in the control group received NIV as rescue therapy, of whom 19 were intubated, thus jeopardising the validity of intention to treat analysis
- The confidence interval for the pooled effect doesn't exclude harm caused by the intervention.

### References

- Confalonieri, M., Potena, A., Carbone, G., Porta, R. D., Tolley, E. A., Umberto Meduri, G.. Acute respiratory failure in patients with severe community-acquired pneumonia. A prospective randomized evaluation of noninvasive ventilation. Am J Respir Crit Care Med; 1999.
- Hilbert, G., Gruson, D., Vargas, F., Valentino, R., Gbikpi-Benissan, G., Dupon, M., Reiffers, J., Cardinaud, J. P.. Noninvasive ventilation in immunosuppressed patients with pulmonary infiltrates, fever, and acute respiratory failure. N Engl J Med; 2001.
- Cosentini, R., Brambilla, A. M., Aliberti, S., Bignamini, A., Nava, S., Maffei, A., Martinotti, R., Tarsia, P., Monzani, V., Pelosi, P.. Helmet continuous positive airway pressure vs oxygen therapy to improve oxygenation in community-acquired pneumonia: a randomized, controlled trial. Chest; 2010.
- Brambilla, A. M., Aliberti, S., Prina, E., Nicoli, F., Del Forno, M., Nava, S., Ferrari, G., Corradi, F., Pelosi, P., Bignamini, A., Tarsia, P., Cosentini, R.. Helmet CPAP vs. oxygen therapy in severe hypoxemic respiratory failure due to pneumonia. Intensive Care Med; 2014.
- Frat, J. P., Thille, A. W., Mercat, A., Girault, C., Ragot, S., Perbet, S., Prat, G., Boulain, T., Morawiec, E., Cottreau, A., Devaquet, J., Nseir, S., Razazi, K., Mira, J. P., Argaud, L., Chakarian, J. C., Ricard, J. D., Wittebole, X., Chevalier, S., Herblaud, A., Fartoukh, M., Constantin, J. M., Tonnelier, J. M., Pierrot, M., Mathonnet, A., Beduneau, G., Deletage-Metreau, C., Richard, J. C., Brochard, L., Robert, R., Group, Florali Study, Network, Reva. High-flow oxygen through nasal cannula in acute hypoxemic respiratory failure. N Engl J Med; 2015.
- Lemiale, V., Mokart, D., Resche-Rigon, M., Pene, F., Mayaux, J., Faucher, E., Nyunga, M., Girault, C., Perez, P., Guitton, C., Ekpe, K., Kouatchet, A., Theodose, I., Benoit, D., Canet, E., Barbier, F., Rabbat, A., Bruneel, F., Vincent, F., Klouche, K., Loay, K., Mariotte, E., Bouadma, L., Moreau, A. S., Seguin, A., Meert, A. P., Reignier, J., Papazian, L., Mehziari, I., Cohen, Y., Schenck, M., Hamidfar, R., Darmon, M., Demoule, A., Chevret, S., Azoulay, E., Groupe de Recherche en Reanimation Respiratoire du patient,

d'Onco-Hematologie. Effect of Noninvasive Ventilation vs Oxygen Therapy on Mortality Among Immunocompromised Patients With Acute Respiratory Failure: A Randomized Clinical Trial. JAMA; 2015.



## Evidence profile: HFNO vs conventional oxygen.

**Study setting:** Adults with sCAP admitted for inpatient treatment in different countries (France).

| Certainty assessment |              |              |               |              |             |                      | No of patients |                     | Effect            |                   | Certainty | Importance |
|----------------------|--------------|--------------|---------------|--------------|-------------|----------------------|----------------|---------------------|-------------------|-------------------|-----------|------------|
| No of studies        | Study design | Risk of bias | Inconsistency | Indirectness | Imprecision | Other considerations | HFNO           | conventional oxygen | Relative (95% CI) | Absolute (95% CI) |           |            |

### Intubation 28 days

|   |                                |                             |             |             |                      |      |                |               |                               |                                                       |                  |          |
|---|--------------------------------|-----------------------------|-------------|-------------|----------------------|------|----------------|---------------|-------------------------------|-------------------------------------------------------|------------------|----------|
| 1 | randomised trials <sup>1</sup> | very serious <sup>a,b</sup> | not serious | not serious | serious <sup>c</sup> | none | 40/106 (37.7%) | 44/94 (46.8%) | <b>RR 0.81</b> (0.58 to 1.12) | <b>89 fewer per 1,000</b> (from 197 fewer to 56 more) | ⊕○○○<br>Very low | CRITICAL |
|---|--------------------------------|-----------------------------|-------------|-------------|----------------------|------|----------------|---------------|-------------------------------|-------------------------------------------------------|------------------|----------|

### Mortality - ICU mortality

|   |                                |             |             |             |                      |      |                |               |                               |                                                      |                  |          |
|---|--------------------------------|-------------|-------------|-------------|----------------------|------|----------------|---------------|-------------------------------|------------------------------------------------------|------------------|----------|
| 1 | randomised trials <sup>1</sup> | not serious | not serious | not serious | serious <sup>c</sup> | none | 12/106 (11.3%) | 11/94 (11.7%) | <b>RR 0.97</b> (0.45 to 2.09) | <b>4 fewer per 1,000</b> (from 64 fewer to 128 more) | ⊕⊕⊕○<br>Moderate | CRITICAL |
|---|--------------------------------|-------------|-------------|-------------|----------------------|------|----------------|---------------|-------------------------------|------------------------------------------------------|------------------|----------|

### Mortality - Hospital mortality

| Certainty assessment |                                |              |               |              |                      |                      | No of patients |                     | Effect                        |                                                       | Certainty     | Importance |
|----------------------|--------------------------------|--------------|---------------|--------------|----------------------|----------------------|----------------|---------------------|-------------------------------|-------------------------------------------------------|---------------|------------|
| No of studies        | Study design                   | Risk of bias | Inconsistency | Indirectness | Imprecision          | Other considerations | HFNO           | conventional oxygen | Relative (95% CI)             | Absolute (95% CI)                                     |               |            |
| 1                    | randomised trials <sup>1</sup> | not serious  | not serious   | not serious  | serious <sup>c</sup> | none                 | 12/106 (11.3%) | 20/94 (21.3%)       | <b>RR 0.53</b> (0.28 to 1.03) | <b>100 fewer per 1,000</b> (from 153 fewer to 6 more) | ⊕⊕⊕○ Moderate | CRITICAL   |

#### Mortality - 90 mortality

|   |                                |             |             |                      |             |      |                |               |                               |                                                        |               |          |
|---|--------------------------------|-------------|-------------|----------------------|-------------|------|----------------|---------------|-------------------------------|--------------------------------------------------------|---------------|----------|
| 1 | randomised trials <sup>1</sup> | not serious | not serious | serious <sup>d</sup> | not serious | none | 13/106 (12.3%) | 22/94 (23.4%) | <b>RR 0.52</b> (0.28 to 0.98) | <b>112 fewer per 1,000</b> (from 169 fewer to 5 fewer) | ⊕⊕⊕○ Moderate | CRITICAL |
|---|--------------------------------|-------------|-------------|----------------------|-------------|------|----------------|---------------|-------------------------------|--------------------------------------------------------|---------------|----------|

CI: confidence interval; RR: risk ratio

#### Explanations

- Due to the nature of the intervention, blinding was not feasible
- 14 patients in the HFNO group received NIV as a rescue therapy, 9 (64%) of whom the were intubated, thus jeopardising validity of the intention-to-treat analysis
- The confidence interval for the effect just includes an appreciable benefit or harm
- It is likely that the effect of HFNO would be most pronounced during hospitalisation; hence, it is not unlikely that the observed difference in survival at later stages is due to factors other than the intervention

## **References**

1. Frat, J. P., Thille, A. W., Mercat, A., Girault, C., Ragot, S., Perbet, S., Prat, G., Boulain, T., Morawiec, E., Cottereau, A., Devaquet, J., Nseir, S., Razazi, K., Mira, J. P., Argaud, L., Chakarian, J. C., Ricard, J. D., Wittebole, X., Chevalier, S., Herbland, A., Fartoukh, M., Constantin, J. M., Tonnelier, J. M., Pierrot, M., Mathonnet, A., Beduneau, G., Deletage-Metreau, C., Richard, J. C., Brochard, L., Robert, R., Group, Florali Study, Network, Reva. High-flow oxygen through nasal cannula in acute hypoxemic respiratory failure. *N Engl J Med*; 2015.

## Evidence to Decision (EtD) Frameworks

**Question 2. In hypoxemic patients with sCAP, can either non-invasive mechanical ventilation (NIV) or high-flow nasal oxygen (HFNC) be used initially—rather than supplemental standard oxygen administration—to avoid intubation and reduce mortality?**

|                      |                                                                             |
|----------------------|-----------------------------------------------------------------------------|
| <b>POPULATION:</b>   | Patients with severe community acquired pneumonia (as defined in the study) |
| <b>INTERVENTION:</b> | NIV or HFNO                                                                 |
| <b>COMPARISON:</b>   | Conventional oxygen therapy                                                 |

## ASSESSMENT

| Desirable Effects                                                                                                                                                |                                                                                                                                                                                                                                                                                                                                                                                                                                                                                                                                                                                                                                                                           |                                                                                                                                                                                                                                                                                                 |
|------------------------------------------------------------------------------------------------------------------------------------------------------------------|---------------------------------------------------------------------------------------------------------------------------------------------------------------------------------------------------------------------------------------------------------------------------------------------------------------------------------------------------------------------------------------------------------------------------------------------------------------------------------------------------------------------------------------------------------------------------------------------------------------------------------------------------------------------------|-------------------------------------------------------------------------------------------------------------------------------------------------------------------------------------------------------------------------------------------------------------------------------------------------|
| How substantial are the desirable anticipated effects?                                                                                                           |                                                                                                                                                                                                                                                                                                                                                                                                                                                                                                                                                                                                                                                                           |                                                                                                                                                                                                                                                                                                 |
| JUDGEMENT                                                                                                                                                        | RESEARCH EVIDENCE                                                                                                                                                                                                                                                                                                                                                                                                                                                                                                                                                                                                                                                         | ADDITIONAL CONSIDERATIONS                                                                                                                                                                                                                                                                       |
| <ul style="list-style-type: none"> <li>○ Trivial</li> <li><b>X</b> Small</li> <li>○ Moderate</li> <li>○ Large</li> <li>○ Varies</li> <li>○ Don't know</li> </ul> | <p>See Summary of Findings</p> <p><b>Desirable</b></p> <p>Intubation decreased with NIV (0.64 [0.43, 0.95]). Combining data from 6 studies</p> <p>Hospital and 90 day mortality less with HFNO (0.52 [0.28, 0.980]). Data are extracted only from one study.</p> <p><b>Neutral/Little effect</b></p> <p>ICU mortality similar with NIV</p> <p>Hospital mortality similar with NIV</p> <p>28d mortality similar with NIV</p> <p>60d and 90d similar with NIV</p> <p>6 month mortality similar with NIV</p> <p>Lower Intubation Rate with NIV vs HFNO demonstrated only for Covid 19</p> <p>ICU mortality similar with HFNO</p> <p>Hospital mortality similar with HFNO</p> | <p>Consider NIV and HFNO separately (only from Frat)</p> <p>Overall no effect for NIV only (Bambrilla changes the effect depend on numbers considered)</p> <p>Small, moderate at best, effect from HFNO (Table 2 Frat 2015)</p> <p>Brambilla: 81 patients: sCAP 51 CAP / 24 HCAP / 6 others</p> |
| Undesirable Effects                                                                                                                                              |                                                                                                                                                                                                                                                                                                                                                                                                                                                                                                                                                                                                                                                                           |                                                                                                                                                                                                                                                                                                 |
| How substantial are the undesirable anticipated effects?                                                                                                         |                                                                                                                                                                                                                                                                                                                                                                                                                                                                                                                                                                                                                                                                           |                                                                                                                                                                                                                                                                                                 |

| JUDGEMENT                                                                                                                                                        | RESEARCH EVIDENCE                                                                                                                                                                                                                                                                                       | ADDITIONAL CONSIDERATIONS                                                                                                                                                                                                                                                                                                                                                                                                        |
|------------------------------------------------------------------------------------------------------------------------------------------------------------------|---------------------------------------------------------------------------------------------------------------------------------------------------------------------------------------------------------------------------------------------------------------------------------------------------------|----------------------------------------------------------------------------------------------------------------------------------------------------------------------------------------------------------------------------------------------------------------------------------------------------------------------------------------------------------------------------------------------------------------------------------|
| <ul style="list-style-type: none"> <li>○ Large</li> <li>○ Moderate</li> <li>○ Small</li> <li><b>X Trivial</b></li> <li>○ Varies</li> <li>○ Don't know</li> </ul> | <p><b>Neutral/little effect</b></p> <p>The potential for undesirable effects with prolonged use of NIV or HFNO</p> <p>No significant effect of hospital or ICU mortality</p> <p>Inconsistent effects of intubation between NIV and HFNO</p> <p>Heterogeneity amongst the various study populations.</p> | <p>Observational data: 24-48 hours as a threshold to decide on intubation. After that patient's outcomes with intubation criteria are worse as more severe</p> <p>Prolonged use of HFNC may have some adverse consequences (caution)</p> <p>In patients allocated to NIV or HFNO, there were 1 case of gastric distention and 2 cases of VAP. In controls, 7 cases of VAP, 4 cases of sinusitis and 1 pneumothorax occurred.</p> |

## Certainty of evidence

What is the overall certainty of the evidence of effects?

| JUDGEMENT                                                                                                                                                    | RESEARCH EVIDENCE                          | ADDITIONAL CONSIDERATIONS                   |
|--------------------------------------------------------------------------------------------------------------------------------------------------------------|--------------------------------------------|---------------------------------------------|
| <ul style="list-style-type: none"> <li><b>X Very low</b></li> <li><b>X Low</b></li> <li>○ Moderate</li> <li>○ High</li> <li>○ No included studies</li> </ul> | <p>Low for NIV, and very low for HFNC.</p> | <p>Due to Risk of bias and imprecision.</p> |

## Values

Is there important uncertainty about or variability in how much people value the main outcomes?

| JUDGEMENT                                                                                                                                                                                                                                                               | RESEARCH EVIDENCE                                                                                                                                                    | ADDITIONAL CONSIDERATIONS |
|-------------------------------------------------------------------------------------------------------------------------------------------------------------------------------------------------------------------------------------------------------------------------|----------------------------------------------------------------------------------------------------------------------------------------------------------------------|---------------------------|
| <ul style="list-style-type: none"> <li>○ Important uncertainty or variability</li> <li><b>X Possibly important uncertainty or variability</b></li> <li>○ Probably no important uncertainty or variability</li> <li>○ No important uncertainty or variability</li> </ul> | <p>Not systematically reviewed as a part of this TF. However, intubation and mortality are judged to be among the most important outcomes in patients with sCAP.</p> |                           |

## Balance of effects

Does the balance between desirable and undesirable effects favor the intervention or the comparison?

| JUDGEMENT                                                                                                                                                                                                                                                                                                           | RESEARCH EVIDENCE                                                                                                                                                                                                   | ADDITIONAL CONSIDERATIONS |
|---------------------------------------------------------------------------------------------------------------------------------------------------------------------------------------------------------------------------------------------------------------------------------------------------------------------|---------------------------------------------------------------------------------------------------------------------------------------------------------------------------------------------------------------------|---------------------------|
| <ul style="list-style-type: none"> <li>○ Favors the comparison</li> <li>○ Probably favors the comparison</li> <li>Does not favor either the intervention or the comparison</li> <li><b>X Probably favors the intervention</b></li> <li>○ Favors the intervention</li> <li>○ Varies</li> <li>○ Don't know</li> </ul> | <p>There was no observed negative effects with the use of NIV or HFNO in patients with sCAP;</p> <p>Most outcomes were neutral with intubation and 90d mortality being favorable for NIV and HFNO respectively.</p> |                           |

## Resources required

How large are the resource requirements (costs)?

| JUDGEMENT                                                                                                                                                                                                                             | RESEARCH EVIDENCE                                                                                                                                                                       | ADDITIONAL CONSIDERATIONS                                                                                                                                        |
|---------------------------------------------------------------------------------------------------------------------------------------------------------------------------------------------------------------------------------------|-----------------------------------------------------------------------------------------------------------------------------------------------------------------------------------------|------------------------------------------------------------------------------------------------------------------------------------------------------------------|
| <ul style="list-style-type: none"> <li>○ Large costs</li> <li><b>X Moderate costs</b></li> <li>○ Negligible costs and savings</li> <li>○ Moderate savings</li> <li>○ Large savings</li> <li>○ Varies</li> <li>○ Don't know</li> </ul> | <p>Not systematically reviewed as a part of this TF. The estimated costs of providing NIV or HFNO in lieu of standard nasal cannula oxygen therapy was not reported in the studies.</p> | <p>HFNC may have relevant resource implications. Low certainty as the cost and availability of resources for NIV and HFNO may vary greatly across settings .</p> |

## Cost effectiveness

Does the cost-effectiveness of the intervention favor the intervention or the comparison?

| JUDGEMENT                                                                                                                                                                                                                                                                                       | RESEARCH EVIDENCE                                       | ADDITIONAL CONSIDERATIONS                                                                                                                                          |
|-------------------------------------------------------------------------------------------------------------------------------------------------------------------------------------------------------------------------------------------------------------------------------------------------|---------------------------------------------------------|--------------------------------------------------------------------------------------------------------------------------------------------------------------------|
| <ul style="list-style-type: none"> <li>○ Favors the comparison</li> <li><b>X Probably favors the comparison</b></li> <li>○ Does not favor either the intervention or the comparison</li> <li>○ Probably favors the intervention</li> <li>○ Favors the intervention</li> <li>○ Varies</li> </ul> | <p>Not systematically reviewed as a part of this TF</p> | <p>The group was consistent in selecting "Probably favours the intervention." All agreed towards the side of cost effectiveness of NIV and HFNO vs comparison.</p> |

|                                                                                                                                                                                                                                                                                          |                                                  |                                                                                                                                                                                                                                                                                                                                                                  |
|------------------------------------------------------------------------------------------------------------------------------------------------------------------------------------------------------------------------------------------------------------------------------------------|--------------------------------------------------|------------------------------------------------------------------------------------------------------------------------------------------------------------------------------------------------------------------------------------------------------------------------------------------------------------------------------------------------------------------|
| <input type="radio"/> No included studies                                                                                                                                                                                                                                                |                                                  |                                                                                                                                                                                                                                                                                                                                                                  |
| <h2>Equity</h2> <p>What would be the impact on health equity?</p>                                                                                                                                                                                                                        |                                                  |                                                                                                                                                                                                                                                                                                                                                                  |
| <b>JUDGEMENT</b>                                                                                                                                                                                                                                                                         | <b>RESEARCH EVIDENCE</b>                         | <b>ADDITIONAL CONSIDERATIONS</b>                                                                                                                                                                                                                                                                                                                                 |
| <input type="radio"/> Reduced<br><input type="radio"/> Probably reduced<br><input type="radio"/> Probably no impact<br><input checked="" type="radio"/> <b>Probably increased</b><br><input type="radio"/> Increased<br><input type="radio"/> Varies<br><input type="radio"/> Don't know | Not systematically reviewed as a part of this TF | <p>sCAP patients disproportionately come from disadvantaged populations, so treating sCAP may improve equity. In low or middle income countries /populations, hospital based NIV or HFNO may not be feasible and a recommendation for NIV or HFNO may exacerbate health equity vs. more financially advantageous regions .</p>                                   |
| <h2>Acceptability</h2> <p>Is the intervention acceptable to key stakeholders?</p>                                                                                                                                                                                                        |                                                  |                                                                                                                                                                                                                                                                                                                                                                  |
| <b>JUDGEMENT</b>                                                                                                                                                                                                                                                                         | <b>RESEARCH EVIDENCE</b>                         | <b>ADDITIONAL CONSIDERATIONS</b>                                                                                                                                                                                                                                                                                                                                 |
| <input type="radio"/> No<br><input type="radio"/> Probably no<br><input type="radio"/> Probably yes<br><input checked="" type="radio"/> <b>Yes</b><br><input type="radio"/> Varies<br><input type="radio"/> Don't know                                                                   | Not systematically reviewed as a part of this TF | <p>HFNC more acceptable intervention vs NIV (Frat 2015).</p> <p>Many clinicians would find NIV or HFNO acceptable due to their use in other acute respiratory conditions -- it is a familiar therapy to those who treat COVID. Patients may vary with regard to acceptability of NIV or HFNO, however if it improves clinical outcomes it may be acceptable.</p> |
| <h2>Feasibility</h2> <p>Is the intervention feasible to implement?</p>                                                                                                                                                                                                                   |                                                  |                                                                                                                                                                                                                                                                                                                                                                  |
| <b>JUDGEMENT</b>                                                                                                                                                                                                                                                                         | <b>RESEARCH EVIDENCE</b>                         | <b>ADDITIONAL CONSIDERATIONS</b>                                                                                                                                                                                                                                                                                                                                 |
| <input type="radio"/> No<br><input type="radio"/> Probably no<br><input type="radio"/> Probably yes<br><input type="radio"/> Yes<br><input checked="" type="radio"/> <b>Varies</b><br><input type="radio"/> Don't know                                                                   | Not systematically reviewed as a part of this TF | <p>HFNC more feasible to implement</p> <p>NIV may have some implementation issues.</p> <p>Some regions may not have infrastructure to support NIV or HFNO is sCAP; however there is widespread use of NIV and HFNO in other countries which can provide practice</p>                                                                                             |

|  |  |                                                                                                                |
|--|--|----------------------------------------------------------------------------------------------------------------|
|  |  | models to guide practice. This will vary depending on the health care system, resources, and patient location. |
|--|--|----------------------------------------------------------------------------------------------------------------|

## TYPE OF RECOMMENDATION

|                                                |                                                     |                                                                          |                                                        |                                            |
|------------------------------------------------|-----------------------------------------------------|--------------------------------------------------------------------------|--------------------------------------------------------|--------------------------------------------|
| Strong recommendation against the intervention | Conditional recommendation against the intervention | Conditional recommendation for either the intervention or the comparison | <b>Conditional recommendation for the intervention</b> | Strong recommendation for the intervention |
| ○                                              | ○                                                   | ○                                                                        | <b>X</b>                                               | ○                                          |

## CONCLUSIONS

### Recommendation

*In patients with sCAP and acute hypoxemic respiratory failure not needing immediate intubation, we suggest using HFNC instead of standard oxygen (conditional recommendation, very low quality of evidence).*

*NIV might be an option in certain patients with persistent hypoxemic respiratory failure not needing immediate intubation, irrespective of HFNC (conditional recommendation, low quality of evidence).*



Question 3. When using initial empiric therapy for sCAP, should a macrolide or fluoroquinolone be used as part of combination therapy, to reduce mortality and adverse clinical outcomes?

#### PRISMA Flow Diagram

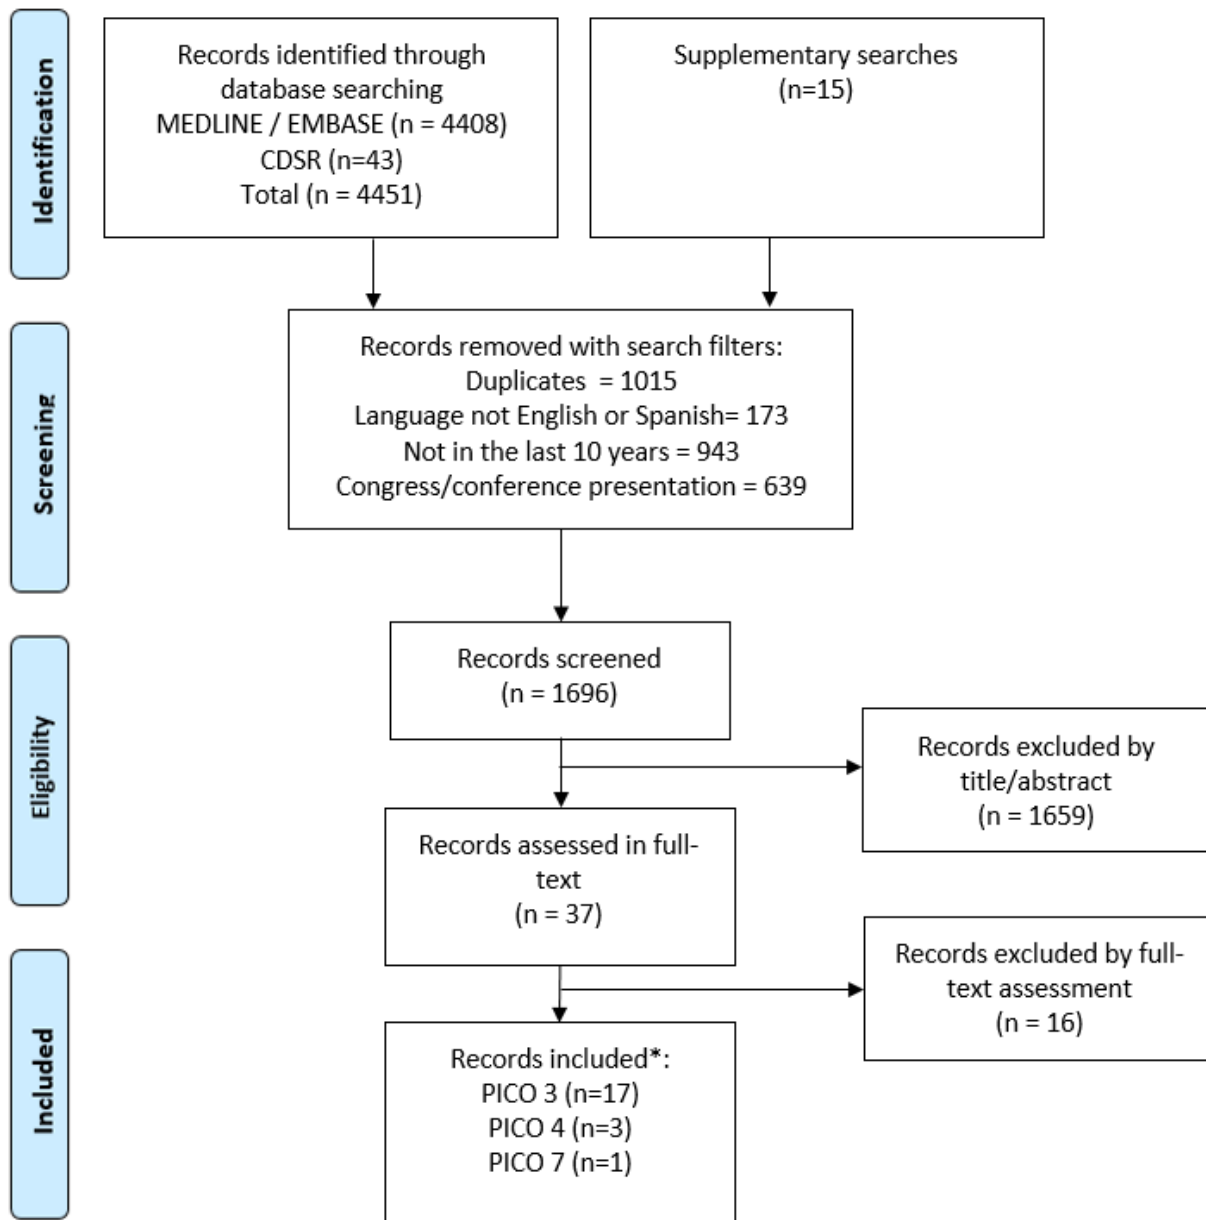

\*For PICOs 3,4,7 (concerning antibiotics) one search strategy was used, results of which are presented in one PRISMA Flow Diagram

From: Moher D, Liberati A, Tetzlaff J, Altman DG, The PRISMA Group (2009). Preferred Reporting Items for Systematic Reviews and Meta-Analyses: The PRISMA Statement. PLoS Med 6(7): e1000097. doi:10.1371/journal.pmed1000097

For more information, visit [www.prisma-statement.org](http://www.prisma-statement.org).

## Forest Plots

### Mortality – all studies

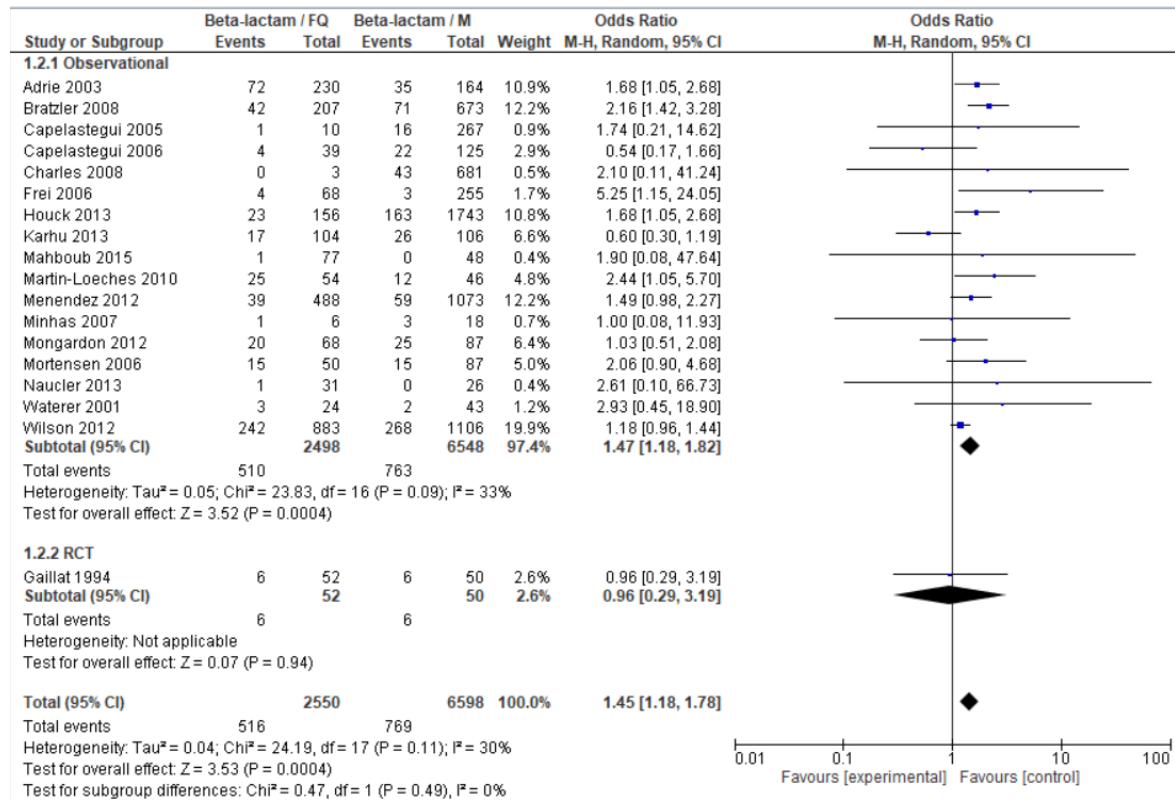

### 30 days mortality (adjusted)

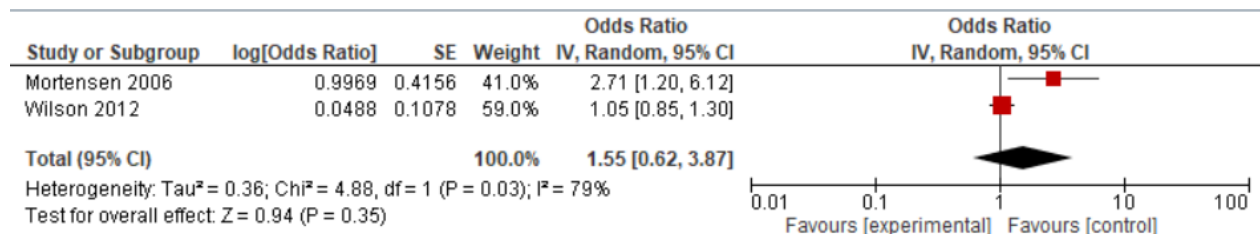

### Duration of antibiotic treatment in days

#### Severe CAP (in GRADE Evidence Profile)

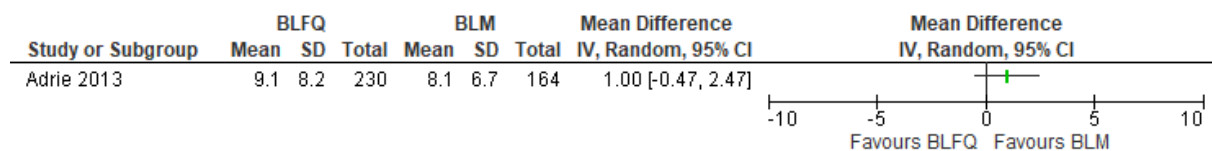

### Mixed population (severe and nonsevere cases included)

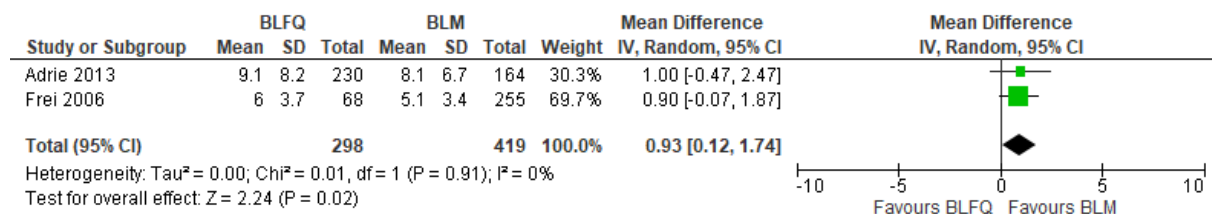

## Length of hospital stay in days

### Severe CAP (in GRADE Evidence Profile)

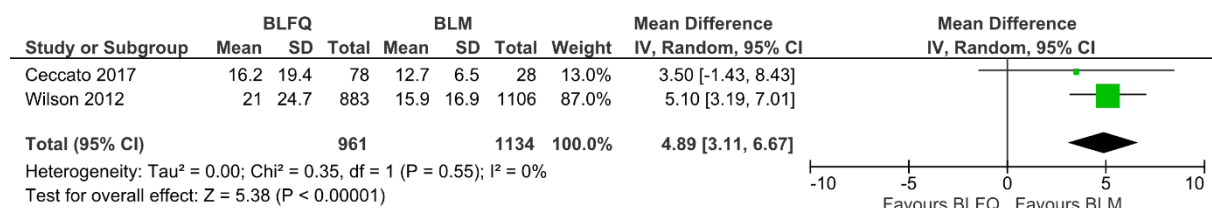

Of note: when comparing medians between BLFQ and BLM (as reported in the original publication), BLFQ shows a slightly longer hospital stay in days: *median [IQR]*: BLFQ (18 [9; 30]) vs BLM (17.5 [10.5; 35]); when comparing mean values (for better interpretation), BLFQ shows a slightly reduced length: *mean [SD]*: BLFQ 19.1 [15.7] vs BLM 21.2 [18.3].

### Mixed population (severe and nonsevere cases included)

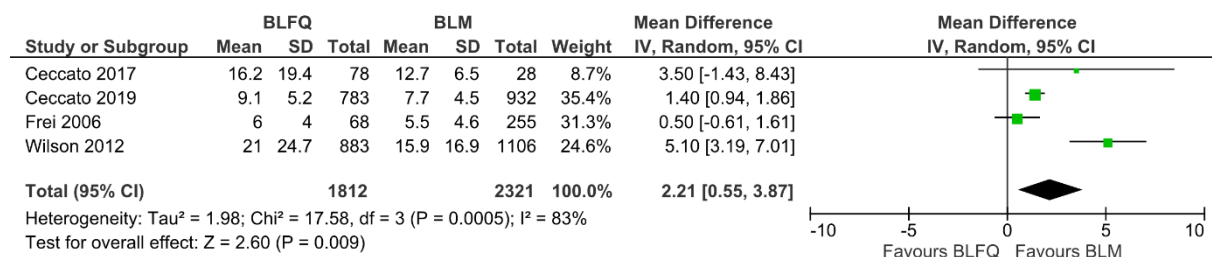

## Length of ICU stay in days

Severe CAP (in GRADE Evidence Profile)

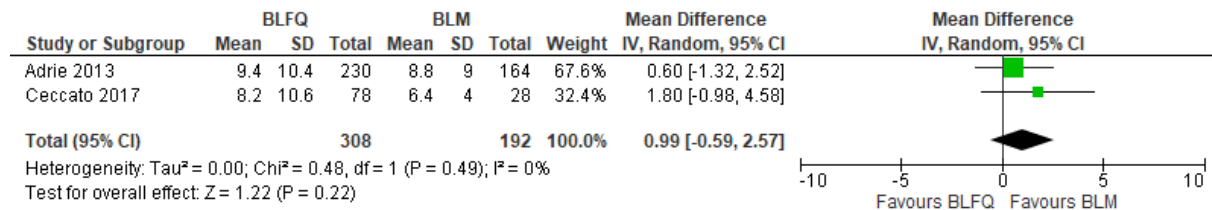

## Time to clinical stability in days

Severe CAP (in GRADE Evidence Profile)

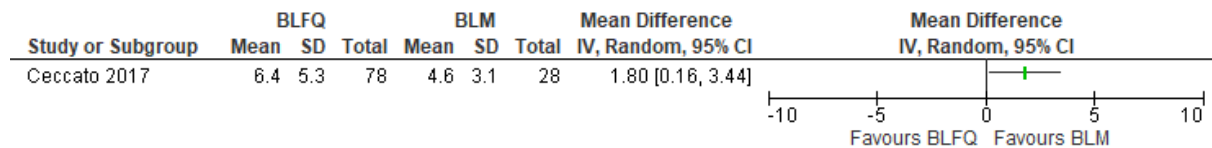

Mixed population (severe and nonsevere cases included)

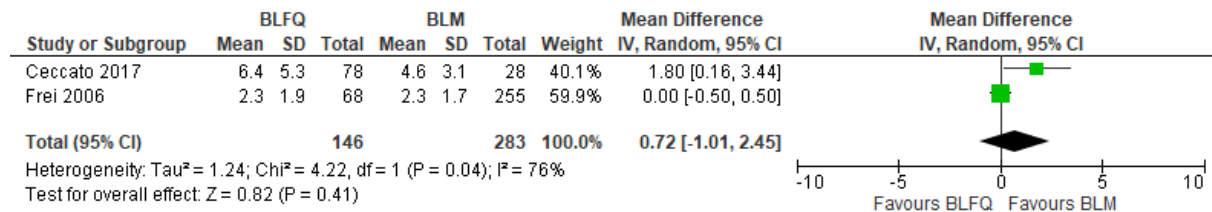

## Treatment failure (composite outcome including incidence of septic shock and invasive mechanical ventilation)

Severe CAP (in GRADE Evidence Profile)

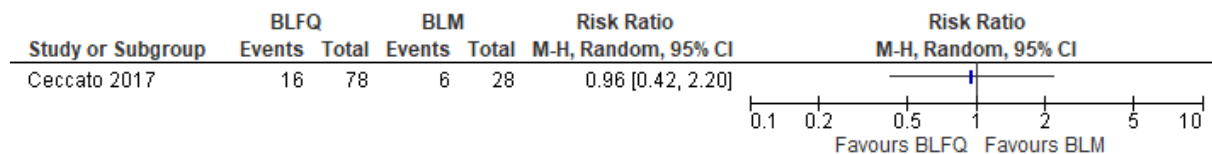

## Incidence of septic shock

Severe CAP (in GRADE Evidence Profile)

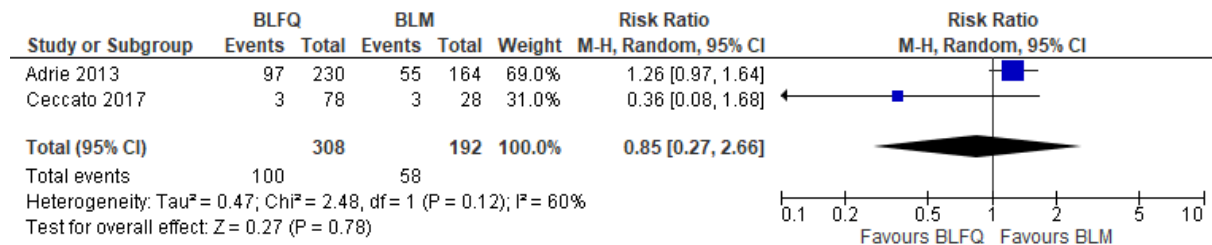

Mixed population (severe and nonsevere cases included)

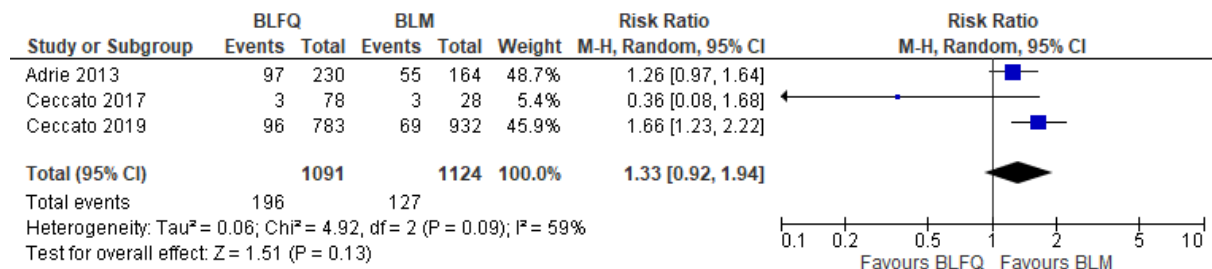

## Incidence of severe sepsis and septic shock

Severe CAP (in GRADE Evidence Profile)

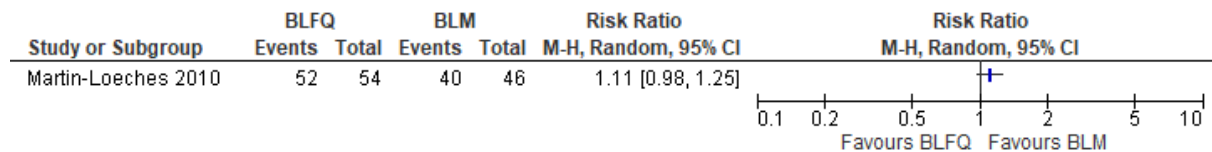

## Mechanical Ventilation

Mechanical ventilation (invasive and noninvasive)

Severe CAP (in GRADE Evidence Profile)

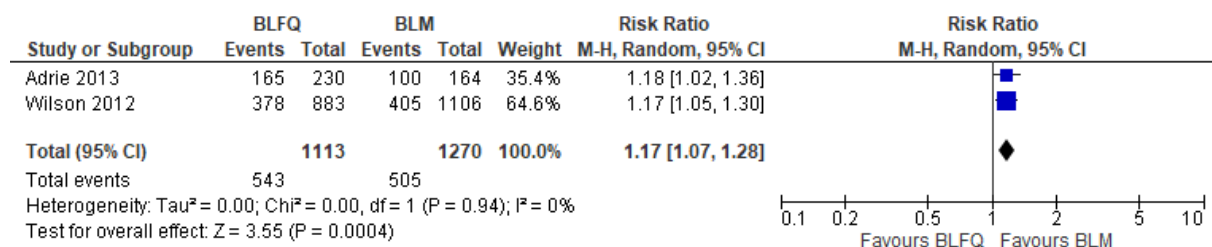

### Mixed population (severe and nonsevere cases included)

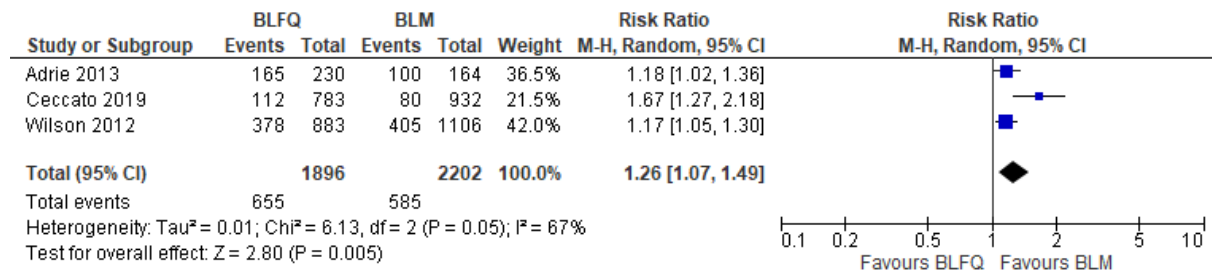

### Mechanical Ventilation (invasive)

#### Severe CAP

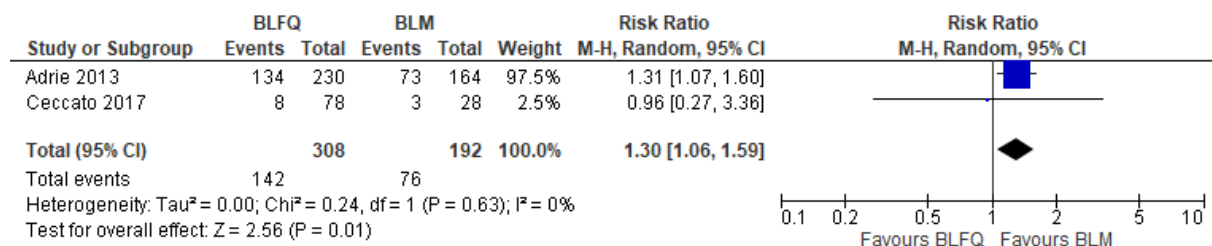

### Mixed population (severe and nonsevere cases included)

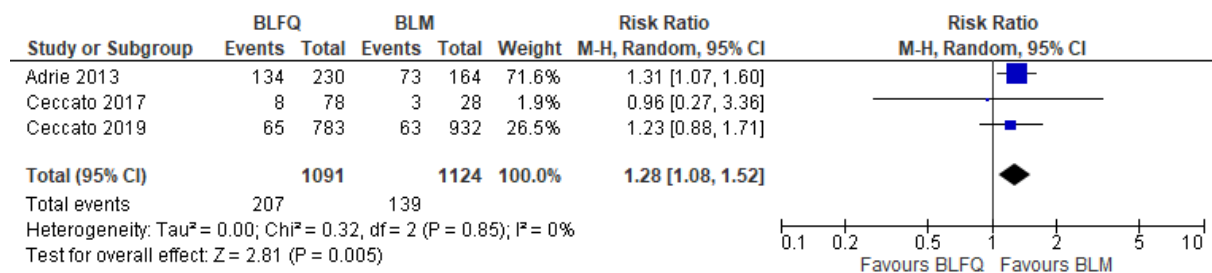

**Question 3. When using initial empiric therapy for sCAP, should a macrolide or fluoroquinolone be used as part of combination therapy, to reduce mortality and adverse clinical outcomes?**

| Certainty assessment |              |              |               |              |             |                      | № of patients  |               | Effect            |                   | Certainty | Importance |
|----------------------|--------------|--------------|---------------|--------------|-------------|----------------------|----------------|---------------|-------------------|-------------------|-----------|------------|
| № of studies         | Study design | Risk of bias | Inconsistency | Indirectness | Imprecision | Other considerations | beta-lactam/FQ | beta-lactam/M | Relative (95% CI) | Absolute (95% CI) |           |            |

#### Mortality all studies

|    |                                       |                      |                      |                          |             |      |                  |                  |                               |                                                   |                  |          |
|----|---------------------------------------|----------------------|----------------------|--------------------------|-------------|------|------------------|------------------|-------------------------------|---------------------------------------------------|------------------|----------|
| 18 | observational studies <sup>1-18</sup> | serious <sup>a</sup> | serious <sup>g</sup> | not serious <sup>c</sup> | not serious | none | 516/2550 (20.2%) | 769/6598 (11.7%) | <b>OR 1.45</b> (1.18 to 1.78) | <b>44 more per 1000</b> (from 18 more to 74 more) | ⊕○○○<br>VERY LOW | CRITICAL |
|----|---------------------------------------|----------------------|----------------------|--------------------------|-------------|------|------------------|------------------|-------------------------------|---------------------------------------------------|------------------|----------|

#### Mortality all studies - Observational

|    |                                              |                      |                      |                          |             |      |                  |                  |                               |                                                   |                  |          |
|----|----------------------------------------------|----------------------|----------------------|--------------------------|-------------|------|------------------|------------------|-------------------------------|---------------------------------------------------|------------------|----------|
| 17 | observational studies <sup>1-10, 12-18</sup> | serious <sup>a</sup> | serious <sup>g</sup> | not serious <sup>c</sup> | not serious | none | 510/2498 (20.4%) | 763/6548 (11.7%) | <b>OR 1.47</b> (1.18 to 1.82) | <b>46 more per 1000</b> (from 18 more to 77 more) | ⊕○○○<br>VERY LOW | CRITICAL |
|----|----------------------------------------------|----------------------|----------------------|--------------------------|-------------|------|------------------|------------------|-------------------------------|---------------------------------------------------|------------------|----------|

#### 30 days mortality (adjusted)

|   |                                       |             |                      |             |                      |      |                 |                  |                               |                                                     |                  |          |
|---|---------------------------------------|-------------|----------------------|-------------|----------------------|------|-----------------|------------------|-------------------------------|-----------------------------------------------------|------------------|----------|
| 2 | observational studies <sup>8,10</sup> | not serious | serious <sup>b</sup> | not serious | serious <sup>h</sup> | none | 257/933 (27.5%) | 283/1193 (23.7%) | <b>OR 1.55</b> (0.62 to 3.87) | <b>88 more per 1000</b> (from 76 fewer to 309 more) | ⊕○○○<br>VERY LOW | CRITICAL |
|---|---------------------------------------|-------------|----------------------|-------------|----------------------|------|-----------------|------------------|-------------------------------|-----------------------------------------------------|------------------|----------|

| Certainty assessment |              |              |               |              |             |                      | № of patients  |               | Effect            |                   | Certainty | Importance |
|----------------------|--------------|--------------|---------------|--------------|-------------|----------------------|----------------|---------------|-------------------|-------------------|-----------|------------|
| № of studies         | Study design | Risk of bias | Inconsistency | Indirectness | Imprecision | Other considerations | beta-lactam/FQ | beta-lactam/M | Relative (95% CI) | Absolute (95% CI) |           |            |

#### ICU survival (adjusted)

|   |                                    |             |                          |             |             |      |    |    |                           |  |             |          |
|---|------------------------------------|-------------|--------------------------|-------------|-------------|------|----|----|---------------------------|--|-------------|----------|
| 1 | observational studies <sup>6</sup> | not serious | not serious <sup>d</sup> | not serious | not serious | none | 52 | 40 | HR 0.44<br>(0.20 to 0.95) |  | ⊕⊕○○<br>LOW | CRITICAL |
|---|------------------------------------|-------------|--------------------------|-------------|-------------|------|----|----|---------------------------|--|-------------|----------|

CI: Confidence interval; OR: Odds ratio

#### Explanations

- a. Pooled non-adjusted (crude) values not accounting for risk factors
- b. Large variability among effect estimates, significant heterogeneity
- c. Although a certain number of the patients accounted would not be classified as severe CAP according to this guideline / clinical question
- d. Single study
- e. Antibiotic regimes not currently used
- f. Very low number of events; 95%CI includes the possibility of a large benefit or a harm
- g. Large variability among effect estimates, borderline statistical heterogeneity
- h. 95%CI includes the possibility of a large benefit or a harm

#### References

1. Adrie C, Schwebel C, Garrouste-Orgeas M, Vignoud L, Planquette B, Azoulay E, et al. Initial use of one or two antibiotics for critically ill patients with community- acquired pneumonia: impact on survival and bacterial resistance. Crit Care 2013;17:R265.
2. Bratzler DW, Ma A, Nsa W. Initial antibiotic selection and patient outcomes: observations from the National Pneumonia Project. Clin Infect Dis 2008;47(Suppl 3):S193e201.



3. Frei CR, Restrepo MI, Mortensen EM, Burgess DS. Impact of guideline-concordant empiric antibiotic therapy in community-acquired pneumonia. *Am J Med* 2006;119:865e71.
4. Houck PM, MacLehose RF, Niederman MS, Lowery JK. Empiric antibiotic therapy and mortality among medicare pneumonia inpatients in 10 western states : 1993, 1995, and 1997. *Chest* 2001;119:1420e6.
5. Karhu J, Ala-Kokko TI, Ohtonen P, Syrjala H. Severe community-acquired pneumonia treated with beta-lactam-respiratory quinolone vs. beta-lactam-macrolide combination. *Acta Anaesthesiol Scand* 2013;57:587e93.
6. Martin-Loeches I, Lisboa T, Rodriguez A, Putensen C, Annane D, Garnacho- Montero J, et al. Combination antibiotic therapy with macrolides improves survival in intubated patients with community-acquired pneumonia. *Intensive Care Med* 2010;36:612e20.
7. Minhas R, Walker SAN, Rachlis A. Management of Community-Acquired Pneumonia at a Tertiary-Care Teaching Hospital. *Can J Hosp Pharm* 2007;60:245e56.
8. Mortensen EM, Restrepo MI, Anzueto A, Pugh J. The impact of empiric antimicrobial therapy with a beta-lactam and fluoroquinolone on mortality for patients hospitalized with severe pneumonia. *Crit Care* 2006;10:R8.
9. Waterer GW, Somes GW, Wunderink RG. Monotherapy may be suboptimal for severe bacteremic pneumococcal pneumonia. *Arch Intern Med* 2001;161:1837e42.
10. Wilson BZ, Anzueto A, Restrepo MI, Pugh MJ, Mortensen EM. Comparison of two guideline-concordant antimicrobial combinations in elderly patients hospitalized with severe community-acquired pneumonia. *Crit Care Med* 2012;40:2310e4.
11. Gaillat J1, Bru JP, Sedallian A. Penicillin G/ofloxacin versus erythromycin/amoxicillin-clavulanate in the treatment of severe community-acquired pneumonia. *Eur J Clin Microbiol Infect Dis*. 1994 Aug;13(8):639-44.
12. Naucler P, Darenberg J, Morfeldt E, Ortqvist A, Henriques Normark B. Contribution of host, bacterial factors and antibiotic treatment to mortality in adult patients with bacteraemic pneumococcal pneumonia. *Thorax* 2013;68: 571e9.
13. Mongardon N, Max A, Bougle A, Pene F, Lemiale V, Charpentier J, et al. Epidemiology and outcome of severe pneumococcal pneumonia admitted to intensive care unit: a multicenter study. *Crit Care* 2012;16:R155.
14. Menendez R, Torres A, Reyes S, Zalacain R, Capelastegui A, Aspa J, et al. Initial management of pneumonia and sepsis: factors associated with improved outcome. *Eur Respir J* 2012;39:156e62.
15. Mahboub B, Al Zaabi A, Al Ali OM, Ahmed R, Niederman MS, El-Bishbishi R. Real life management of community-acquired Pneumonia in adults in the Gulf region and comparison with practice guidelines: a prospective study. *BMC Pulm Med* 2015;15:112.
16. Capelastegui A, Espana PP, Quintana JM, Gorordo I, Martinez Urquiri A, Idoiaga I, et al. Patients hospitalized with community-acquired pneumonia: a comparative study of outcomes by medical specialty area. *Arch Bronconeumol* 2005;41:300e6.
17. Capelastegui A, Espana PP, Quintana JM, Gorordo I, Sanudo C, Bilbao A. Evaluation of clinical practice in patients admitted with community-acquired pneumonia over a 4-year period. *Arch Bronconeumol* 2006;42:283e9.
18. Charles PG, Whitby M, Fuller AJ, Stirling R, Wright AA, Korman TM, et al. The etiology of community-acquired pneumonia in Australia: why penicillin plus doxycycline or a macrolide is the most appropriate therapy. *Clin Infect Dis* 2008;46:1513e21.

## Evidence profile for participants with sCAP

**Study setting:** Participants with sCAP hospitalized or in ICU;

| Certainty assessment      |              |              |               |              |             |                      | Events (if applicable)/ N |               | Effect            |                   | Certainty | Importance |
|---------------------------|--------------|--------------|---------------|--------------|-------------|----------------------|---------------------------|---------------|-------------------|-------------------|-----------|------------|
| N studies (max follow-up) | Study design | Risk of bias | Inconsistency | Indirectness | Imprecision | Other considerations | beta-lactam/FQ            | beta-lactam/M | Relative (95% CI) | Absolute (95% CI) |           |            |

### Duration of antibiotic treatment in days

|             |               |                           |             |             |                      |      |     |     |   |                                     |                  |          |
|-------------|---------------|---------------------------|-------------|-------------|----------------------|------|-----|-----|---|-------------------------------------|------------------|----------|
| 1 (60 days) | observational | very serious <sup>a</sup> | not serious | not serious | serious <sup>b</sup> | none | 230 | 164 | - | MD 1 more (0.47 fewer to 2.47 more) | ⊕○○○<br>VERY LOW | CRITICAL |
|-------------|---------------|---------------------------|-------------|-------------|----------------------|------|-----|-----|---|-------------------------------------|------------------|----------|

### Length of hospital stay in days

|             |               |                           |             |             |             |      |     |      |   |                                             |                  |           |
|-------------|---------------|---------------------------|-------------|-------------|-------------|------|-----|------|---|---------------------------------------------|------------------|-----------|
| 2 (30 days) | observational | very serious <sup>a</sup> | not serious | not serious | not serious | none | 961 | 1134 | - | MD 4.89 higher (3.11 higher to 6.67 higher) | ⊕○○○<br>VERY LOW | IMPORTANT |
|-------------|---------------|---------------------------|-------------|-------------|-------------|------|-----|------|---|---------------------------------------------|------------------|-----------|

### Length of ICU stay in days

| Certainty assessment      |               |                           |               |              |                      |                      | Events (if applicable)/ N participants |               | Effect            |                                        | Certainty        | Importance |
|---------------------------|---------------|---------------------------|---------------|--------------|----------------------|----------------------|----------------------------------------|---------------|-------------------|----------------------------------------|------------------|------------|
| N studies (max follow-up) | Study design  | Risk of bias              | Inconsistency | Indirectness | Imprecision          | Other considerations | beta-lactam/FQ                         | beta-lactam/M | Relative (95% CI) | Absolute (95% CI)                      |                  |            |
| 2 (60 days)               | observational | very serious <sup>a</sup> | not serious   | not serious  | serious <sup>b</sup> | none                 | 308                                    | 192           | -                 | MD 0.99 more (0.59 fewer to 2.57 more) | ⊕○○○<br>VERY LOW | IMPORTANT  |

#### Time to clinical stability in days

|         |               |                           |             |             |                      |      |    |    |   |                                      |                  |           |
|---------|---------------|---------------------------|-------------|-------------|----------------------|------|----|----|---|--------------------------------------|------------------|-----------|
| 1 (NR)* | observational | very serious <sup>a</sup> | not serious | not serious | serious <sup>d</sup> | none | 78 | 28 | - | MD 1.8 more (0.16 more to 3.44 more) | ⊕○○○<br>VERY LOW | IMPORTANT |
|---------|---------------|---------------------------|-------------|-------------|----------------------|------|----|----|---|--------------------------------------|------------------|-----------|

#### Treatment failure (composite outcome including incidence of septic shock and invasive mechanical ventilation)

|         |               |                           |             |             |                             |      |               |              |                     |                                               |                  |          |
|---------|---------------|---------------------------|-------------|-------------|-----------------------------|------|---------------|--------------|---------------------|-----------------------------------------------|------------------|----------|
| 1 (NR)* | observational | very serious <sup>a</sup> | not serious | not serious | very serious <sup>b d</sup> | none | 16/78 (20.5%) | 6/28 (21.4%) | RR 0.96 (0.42-2.20) | 9 fewer per 1000 (from 124 fewer to 257 more) | ⊕○○○<br>VERY LOW | CRITICAL |
|---------|---------------|---------------------------|-------------|-------------|-----------------------------|------|---------------|--------------|---------------------|-----------------------------------------------|------------------|----------|

#### Incidence of septic shock

| Certainty assessment      |               |                           |                      |              |                      |                      | Events (if applicable)/ N |                | Effect              |                                                | Certainty        | Importance |
|---------------------------|---------------|---------------------------|----------------------|--------------|----------------------|----------------------|---------------------------|----------------|---------------------|------------------------------------------------|------------------|------------|
| N studies (max follow-up) | Study design  | Risk of bias              | Inconsistency        | Indirectness | Imprecision          | Other considerations | beta-lactam/FQ            | beta-lactam/M  | Relative (95% CI)   | Absolute (95% CI)                              |                  |            |
| 2 (60 days)               | observational | very serious <sup>a</sup> | serious <sup>c</sup> | not serious  | serious <sup>b</sup> | none                 | 100/308 (32.5%)           | 58/192 (30.2%) | RR 0.85 (0.27-2.66) | 45 fewer per 1000 (from 221 fewer to 501 more) | ⊕○○○<br>VERY LOW | CRITICAL   |

#### Incidence of severe sepsis and septic shock

|             |               |                           |             |             |                      |      |               |               |                     |                                              |                  |          |
|-------------|---------------|---------------------------|-------------|-------------|----------------------|------|---------------|---------------|---------------------|----------------------------------------------|------------------|----------|
| 1 (30 days) | observational | very serious <sup>a</sup> | not serious | not serious | serious <sup>b</sup> | none | 52/54 (96.3%) | 40/46 (87.0%) | RR 1.11 (0.98-1.25) | 96 more per 1000 (from 17 fewer to 217 more) | ⊕○○○<br>VERY LOW | CRITICAL |
|-------------|---------------|---------------------------|-------------|-------------|----------------------|------|---------------|---------------|---------------------|----------------------------------------------|------------------|----------|

#### Mechanical ventilation (invasive and noninvasive)

|             |               |                           |             |             |             |      |                  |                  |                     |                                             |                  |          |
|-------------|---------------|---------------------------|-------------|-------------|-------------|------|------------------|------------------|---------------------|---------------------------------------------|------------------|----------|
| 2 (60 days) | observational | very serious <sup>a</sup> | not serious | not serious | not serious | none | 543/1113 (48.8%) | 505/1270 (39.8%) | RR 1.17 (1.07-1.28) | 68 more per 1000 (from 28 more to 111 more) | ⊕○○○<br>VERY LOW | CRITICAL |
|-------------|---------------|---------------------------|-------------|-------------|-------------|------|------------------|------------------|---------------------|---------------------------------------------|------------------|----------|

BLM=β-Lactam plus Macrolide; BLFQ=β-Lactam plus Fluoroquinolone CI: confidence interval; ICU: intensive care unit; RR: risk ratio; MD: mean difference.

\* Until discharge from hospital.

#### Explanations

- a. Risk of bias downgraded by two levels: major concerns for confounding / selection bias and lack of blinding; Furthermore selective reporting cannot be excluded.
- b. Imprecision downgraded by one level: 95%-CI is consistent with the possibility of benefit and harm / with the possibility of fewer and the possibility of more events.
- c. Inconsistency downgraded by one level: high  $I^2$ ; i.e., the proportion of the variation in point estimates due to “between-study differences” is large,  $I^2 > 50\%$ .
- d. Imprecision downgraded by one level: due to the low number of participants resulting from a single clinical study.

## Literature

1. Adrie C, Schwebel C, Garrouste-Orgeas M, et al. Initial use of one or two antibiotics for critically ill patients with community-acquired pneumonia: impact on survival and bacterial resistance. *Crit Care*. 2013;17(6):R265.
2. Ceccato A, Cilloniz C, Ranzani OT, et al. Treatment with macrolides and glucocorticosteroids in severe community-acquired pneumonia: A post-hoc exploratory analysis of a randomized controlled trial. *PLoS One*. 2017;12(6):e0178022.
3. Ceccato A, Cilloniz C, Martin-Loeches I, et al. Effect of Combined  $\beta$ -Lactam/Macrolide Therapy on Mortality According to the Microbial Etiology and Inflammatory Status of Patients With Community-Acquired Pneumonia. *Chest*. 2019;155(4):795-804.
4. Frei CR, Restrepo MI, Mortensen EM, Burgess DS. Impact of guideline-concordant empiric antibiotic therapy in community-acquired pneumonia. *Am J Med*. 2006;119(10):865-871
5. Martin-Loeches I, Lisboa T, Rodriguez A, et al. Combination antibiotic therapy with macrolides improves survival in intubated patients with community-acquired pneumonia. *Intensive Care Med*. 2010;36(4):612-620.
6. Wilson BZ, Anzueto A, Restrepo MI, Pugh MJ, Mortensen EM. Comparison of two guideline-concordant antimicrobial combinations in elderly patients hospitalized with severe community-acquired pneumonia. *Crit Care Med*. 2012;40(8):2310-2314.

## Evidence to Decision (EtD) Frameworks

**Question 3. When using initial empiric therapy for sCAP, should a macrolide or fluoroquinolone be used as part of combination therapy, to reduce mortality and adverse clinical outcomes?**

|                       |                                                                             |
|-----------------------|-----------------------------------------------------------------------------|
| <b>POPULATION:</b>    | Patients with severe community acquired pneumonia (as defined in the study) |
| <b>INTERVENTION:</b>  | Fluoroquinolones combined with beta-lactam                                  |
| <b>COMPARISON:</b>    | Macrolides combined with beta-lactam                                        |
| <b>MAIN OUTCOMES:</b> | Overall mortality, Mortality at 30 days                                     |
| <b>SETTING:</b>       | Hospital                                                                    |
| <b>PERSPECTIVE:</b>   |                                                                             |

### ASSESSMENT

| Desirable Effects                                                                                                                                                |                                                                                                                                                                                                                                                                                                                                                                                                                                                                                                                                                                                                                                                                                                                                                                                                                                                                          |                                                                                                                                                                                                                                                                                                                                                                                |
|------------------------------------------------------------------------------------------------------------------------------------------------------------------|--------------------------------------------------------------------------------------------------------------------------------------------------------------------------------------------------------------------------------------------------------------------------------------------------------------------------------------------------------------------------------------------------------------------------------------------------------------------------------------------------------------------------------------------------------------------------------------------------------------------------------------------------------------------------------------------------------------------------------------------------------------------------------------------------------------------------------------------------------------------------|--------------------------------------------------------------------------------------------------------------------------------------------------------------------------------------------------------------------------------------------------------------------------------------------------------------------------------------------------------------------------------|
| How substantial are the desirable anticipated effects?                                                                                                           |                                                                                                                                                                                                                                                                                                                                                                                                                                                                                                                                                                                                                                                                                                                                                                                                                                                                          |                                                                                                                                                                                                                                                                                                                                                                                |
| JUDGEMENT                                                                                                                                                        | RESEARCH EVIDENCE                                                                                                                                                                                                                                                                                                                                                                                                                                                                                                                                                                                                                                                                                                                                                                                                                                                        | ADDITIONAL CONSIDERATIONS                                                                                                                                                                                                                                                                                                                                                      |
| <ul style="list-style-type: none"> <li>○ Trivial</li> <li>○ Small</li> <li>○ Moderate</li> <li><b>x Large</b></li> <li>○ Varies</li> <li>○ Don't know</li> </ul> | <p>The large majority of data on mortality of patients with severe CAP receiving FQ <i>versus</i> macrolide in addition to beta-lactam as empiric antibiotic therapy are based on 17 observational studies with very low certainty, serious risk of bias and inconsistency.).</p> <p>Although the majority of the evidence is based on observational study, thousands of patients have been evaluated showing a large desirable effect in favour of the comparator (macrolide) rather than the intervention (FQ) given in addition to beta-lactams as empiric antibiotic therapy. The only RCT available so far, enrolled 117 patients and shows low generalizability in light of the long time that has elapsed since the study was carried out as testified by some of the antibiotics considered in the trial that are rarely used nowadays in clinical practice.</p> | <p>Macrolide has a relevant and well-known immunomodulatory/anti-inflammatory effect which might have an impact on clinical outcomes besides its antimicrobial properties.</p> <p>The task force also considered the duration of treatment of macrolides being between 3 and 5 days. This would be a reasonable timing especially in the context of de-escalation therapy.</p> |
| Undesirable Effects                                                                                                                                              |                                                                                                                                                                                                                                                                                                                                                                                                                                                                                                                                                                                                                                                                                                                                                                                                                                                                          |                                                                                                                                                                                                                                                                                                                                                                                |
| How substantial are the undesirable anticipated effects?                                                                                                         |                                                                                                                                                                                                                                                                                                                                                                                                                                                                                                                                                                                                                                                                                                                                                                                                                                                                          |                                                                                                                                                                                                                                                                                                                                                                                |
| JUDGEMENT                                                                                                                                                        | RESEARCH EVIDENCE                                                                                                                                                                                                                                                                                                                                                                                                                                                                                                                                                                                                                                                                                                                                                                                                                                                        | ADDITIONAL CONSIDERATIONS                                                                                                                                                                                                                                                                                                                                                      |
| <ul style="list-style-type: none"> <li><b>X Large</b></li> <li>○ Moderate</li> </ul>                                                                             | <p>Safety profiles of both FQ and macrolide are well-known. Adverse events for FQ and macrolide were not considered a</p>                                                                                                                                                                                                                                                                                                                                                                                                                                                                                                                                                                                                                                                                                                                                                | <p>Both macrolides and FQs are among antibiotic classes associated with QT prolongation and</p>                                                                                                                                                                                                                                                                                |

|                                                                                                                                                                                                                                                                         |                                                                                                                                                                                                                                                                                                                                                                          |                                                                                                                                                                                                                                                                                                                                                                                                            |
|-------------------------------------------------------------------------------------------------------------------------------------------------------------------------------------------------------------------------------------------------------------------------|--------------------------------------------------------------------------------------------------------------------------------------------------------------------------------------------------------------------------------------------------------------------------------------------------------------------------------------------------------------------------|------------------------------------------------------------------------------------------------------------------------------------------------------------------------------------------------------------------------------------------------------------------------------------------------------------------------------------------------------------------------------------------------------------|
| <ul style="list-style-type: none"> <li>○ Small</li> <li>○ Trivial</li> <li>○ Varies</li> <li>○ Don't know</li> </ul>                                                                                                                                                    | <p>critical outcome by the task force and the small studies evaluated by the systematic review were not powered enough to test differences in safety between FQ and macrolides.</p> <p>Azithromycin and clarithromycin, like erythromycin have been associated with gastrointestinal side effects, hepatotoxicity, QT prolongation, and other cardiovascular events.</p> | <p>cardiotoxicity. Macrolides, including azithromycin may induce QTc interval prolongation setting the stage for <i>torsade de pointes</i>. Clinicians should consider this adverse effect when selecting among antibiotics with the understanding that macrolide and non-macrolide antibiotics, especially fluoroquinolones, also may induce QTc interval prolongation and <i>torsade de pointes</i>.</p> |
| <b>Certainty of evidence</b><br>What is the overall certainty of the evidence of effects?                                                                                                                                                                               |                                                                                                                                                                                                                                                                                                                                                                          |                                                                                                                                                                                                                                                                                                                                                                                                            |
| JUDGEMENT                                                                                                                                                                                                                                                               | RESEARCH EVIDENCE                                                                                                                                                                                                                                                                                                                                                        | ADDITIONAL CONSIDERATIONS                                                                                                                                                                                                                                                                                                                                                                                  |
| <b>X Very low</b> <ul style="list-style-type: none"> <li>○ Low</li> <li>○ Moderate</li> <li>○ High</li> <li>○ No included studies</li> </ul>                                                                                                                            | <p>Certainty of evidence has been judged very low for all outcomes, due to their design, risk of bias or imprecision.</p>                                                                                                                                                                                                                                                | <p>RCT specific in sCAP population would be desirable to be conducted.</p>                                                                                                                                                                                                                                                                                                                                 |
| <b>Values</b><br>Is there important uncertainty about or variability in how much people value the main outcomes?                                                                                                                                                        |                                                                                                                                                                                                                                                                                                                                                                          |                                                                                                                                                                                                                                                                                                                                                                                                            |
| JUDGEMENT                                                                                                                                                                                                                                                               | RESEARCH EVIDENCE                                                                                                                                                                                                                                                                                                                                                        | ADDITIONAL CONSIDERATIONS                                                                                                                                                                                                                                                                                                                                                                                  |
| <ul style="list-style-type: none"> <li>○ Important uncertainty or variability</li> <li><b>x Possibly important uncertainty or variability</b></li> <li>○ Probably no important uncertainty or variability</li> <li>○ No important uncertainty or variability</li> </ul> | <p>Not systematically reviewed as a part of this TF</p>                                                                                                                                                                                                                                                                                                                  | <p>There has been small variability on how the panel rated critical outcomes.</p> <p>The guideline panel agreed by consensus that there is possibly important uncertainty or variability.</p>                                                                                                                                                                                                              |
| <b>Balance of effects</b><br>Does the balance between desirable and undesirable effects favor the intervention or the comparison?                                                                                                                                       |                                                                                                                                                                                                                                                                                                                                                                          |                                                                                                                                                                                                                                                                                                                                                                                                            |
| JUDGEMENT                                                                                                                                                                                                                                                               | RESEARCH EVIDENCE                                                                                                                                                                                                                                                                                                                                                        | ADDITIONAL CONSIDERATIONS                                                                                                                                                                                                                                                                                                                                                                                  |

|                                                                                                                                                                                                                                                                                                                                                                                      |                                                                                                                                                                                                                                                                                                                                                                                                                                                                                              |                                                                                                                         |
|--------------------------------------------------------------------------------------------------------------------------------------------------------------------------------------------------------------------------------------------------------------------------------------------------------------------------------------------------------------------------------------|----------------------------------------------------------------------------------------------------------------------------------------------------------------------------------------------------------------------------------------------------------------------------------------------------------------------------------------------------------------------------------------------------------------------------------------------------------------------------------------------|-------------------------------------------------------------------------------------------------------------------------|
| <b>X Favors the comparison</b><br><input type="radio"/> Probably favors the comparison<br><input type="radio"/> Does not favor either the intervention or the comparison<br><input type="radio"/> Probably favors the intervention<br><input type="radio"/> Favors the intervention<br><input type="radio"/> Varies<br><input type="radio"/> Don't know                              | Although sustained mainly by observational studies, data on both mortality and the need for either invasive or non-invasive mechanical ventilation are in favors of macrolide in comparison to FQ when given in addition to betalactams as empiric antibiotic therapy in patients with severe CAP. Considering the fact that adverse events of both FQ and macrolide are well-known since several years, the balance between desirable and undesirable effects favor macrolides (comparison) | None                                                                                                                    |
| <b>Resources required</b><br>How large are the resource requirements (costs)?                                                                                                                                                                                                                                                                                                        |                                                                                                                                                                                                                                                                                                                                                                                                                                                                                              |                                                                                                                         |
| JUDGEMENT                                                                                                                                                                                                                                                                                                                                                                            | RESEARCH EVIDENCE                                                                                                                                                                                                                                                                                                                                                                                                                                                                            | ADDITIONAL CONSIDERATIONS                                                                                               |
| <input type="radio"/> Large costs<br><input type="radio"/> Moderate costs<br><input type="radio"/> Negligible costs and savings<br><input type="radio"/> Moderate savings<br><input type="radio"/> Large savings<br><input type="radio"/> Varies<br><input checked="" type="radio"/> <b>Don't know</b>                                                                               | Not systematically reviewed as a part of this TF                                                                                                                                                                                                                                                                                                                                                                                                                                             | Cost of fluorquinolones might be an issue in some countries whilst macrolides would be not expensive and more available |
| <b>Cost effectiveness</b><br>Does the cost-effectiveness of the intervention favor the intervention or the comparison?                                                                                                                                                                                                                                                               |                                                                                                                                                                                                                                                                                                                                                                                                                                                                                              |                                                                                                                         |
| JUDGEMENT                                                                                                                                                                                                                                                                                                                                                                            | RESEARCH EVIDENCE                                                                                                                                                                                                                                                                                                                                                                                                                                                                            | ADDITIONAL CONSIDERATIONS                                                                                               |
| <input type="radio"/> Favors the comparison<br><input type="radio"/> Probably favors the comparison<br><input type="radio"/> Does not favor either the intervention or the comparison<br><input type="radio"/> Probably favors the intervention<br><input type="radio"/> Favors the intervention<br><input type="radio"/> Varies<br><input type="radio"/> <b>No included studies</b> | Not systematically reviewed as a part of this TF                                                                                                                                                                                                                                                                                                                                                                                                                                             | The panel considered that the intervention probably would be accepted                                                   |
| <b>Equity</b><br>What would be the impact on health equity?                                                                                                                                                                                                                                                                                                                          |                                                                                                                                                                                                                                                                                                                                                                                                                                                                                              |                                                                                                                         |
| JUDGEMENT                                                                                                                                                                                                                                                                                                                                                                            | RESEARCH EVIDENCE                                                                                                                                                                                                                                                                                                                                                                                                                                                                            | ADDITIONAL CONSIDERATIONS                                                                                               |



|                                                                                                                                                                                                                                                                               |                                                  |                                                             |
|-------------------------------------------------------------------------------------------------------------------------------------------------------------------------------------------------------------------------------------------------------------------------------|--------------------------------------------------|-------------------------------------------------------------|
| <input type="radio"/> Reduced<br><input type="radio"/> Probably reduced<br><input type="radio"/> Probably no impact<br><input type="radio"/> Probably increased<br><input type="radio"/> Increased<br><input type="radio"/> Varies<br><input type="radio"/> <b>Don't know</b> | Not systematically reviewed as a part of this TF | The panel agreed that there is probably no impact on equity |
|-------------------------------------------------------------------------------------------------------------------------------------------------------------------------------------------------------------------------------------------------------------------------------|--------------------------------------------------|-------------------------------------------------------------|

## Acceptability

Is the intervention acceptable to key stakeholders?

| JUDGEMENT                                                                                                                                                                                                       | RESEARCH EVIDENCE                                | ADDITIONAL CONSIDERATIONS                                             |
|-----------------------------------------------------------------------------------------------------------------------------------------------------------------------------------------------------------------|--------------------------------------------------|-----------------------------------------------------------------------|
| <input type="radio"/> No<br><input type="radio"/> Probably no<br><input checked="" type="radio"/> Probably yes<br><input type="radio"/> Yes<br><input type="radio"/> Varies<br><input type="radio"/> Don't know | Not systematically reviewed as a part of this TF | The panel considered that the intervention probably would be accepted |

## Feasibility

Is the intervention feasible to implement?

| JUDGEMENT                                                                                                                                                                                                       | RESEARCH EVIDENCE                                | ADDITIONAL CONSIDERATIONS                                             |
|-----------------------------------------------------------------------------------------------------------------------------------------------------------------------------------------------------------------|--------------------------------------------------|-----------------------------------------------------------------------|
| <input type="radio"/> No<br><input type="radio"/> Probably no<br><input checked="" type="radio"/> Probably yes<br><input type="radio"/> Yes<br><input type="radio"/> Varies<br><input type="radio"/> Don't know | Not systematically reviewed as a part of this TF | The panel considered that the intervention probably would be accepted |

## TYPE OF RECOMMENDATION

|                                                                             |                                                                                                    |                                                                                                       |                                                                              |                                                                         |
|-----------------------------------------------------------------------------|----------------------------------------------------------------------------------------------------|-------------------------------------------------------------------------------------------------------|------------------------------------------------------------------------------|-------------------------------------------------------------------------|
| Strong recommendation against the intervention<br><br><input type="radio"/> | <b>Conditional recommendation against the intervention</b><br><br><input checked="" type="radio"/> | Conditional recommendation for either the intervention or the comparison<br><br><input type="radio"/> | Conditional recommendation for the intervention<br><br><input type="radio"/> | Strong recommendation for the intervention<br><br><input type="radio"/> |
|-----------------------------------------------------------------------------|----------------------------------------------------------------------------------------------------|-------------------------------------------------------------------------------------------------------|------------------------------------------------------------------------------|-------------------------------------------------------------------------|

## CONCLUSIONS

### Recommendation

*We suggest the addition of macrolides, not fluoroquinolones, to beta-lactams as empiric antibiotic therapy in hospitalized patients with sCAP (conditional recommendation, very low quality of evidence).*

Question 4. In patients with sCAP, can serum procalcitonin (PCT) be used to reduce the duration of antibiotic therapy and improve other outcomes in comparison to standard of care not guided by serial biomarker measurements?

#### PRISMA Flow Diagram

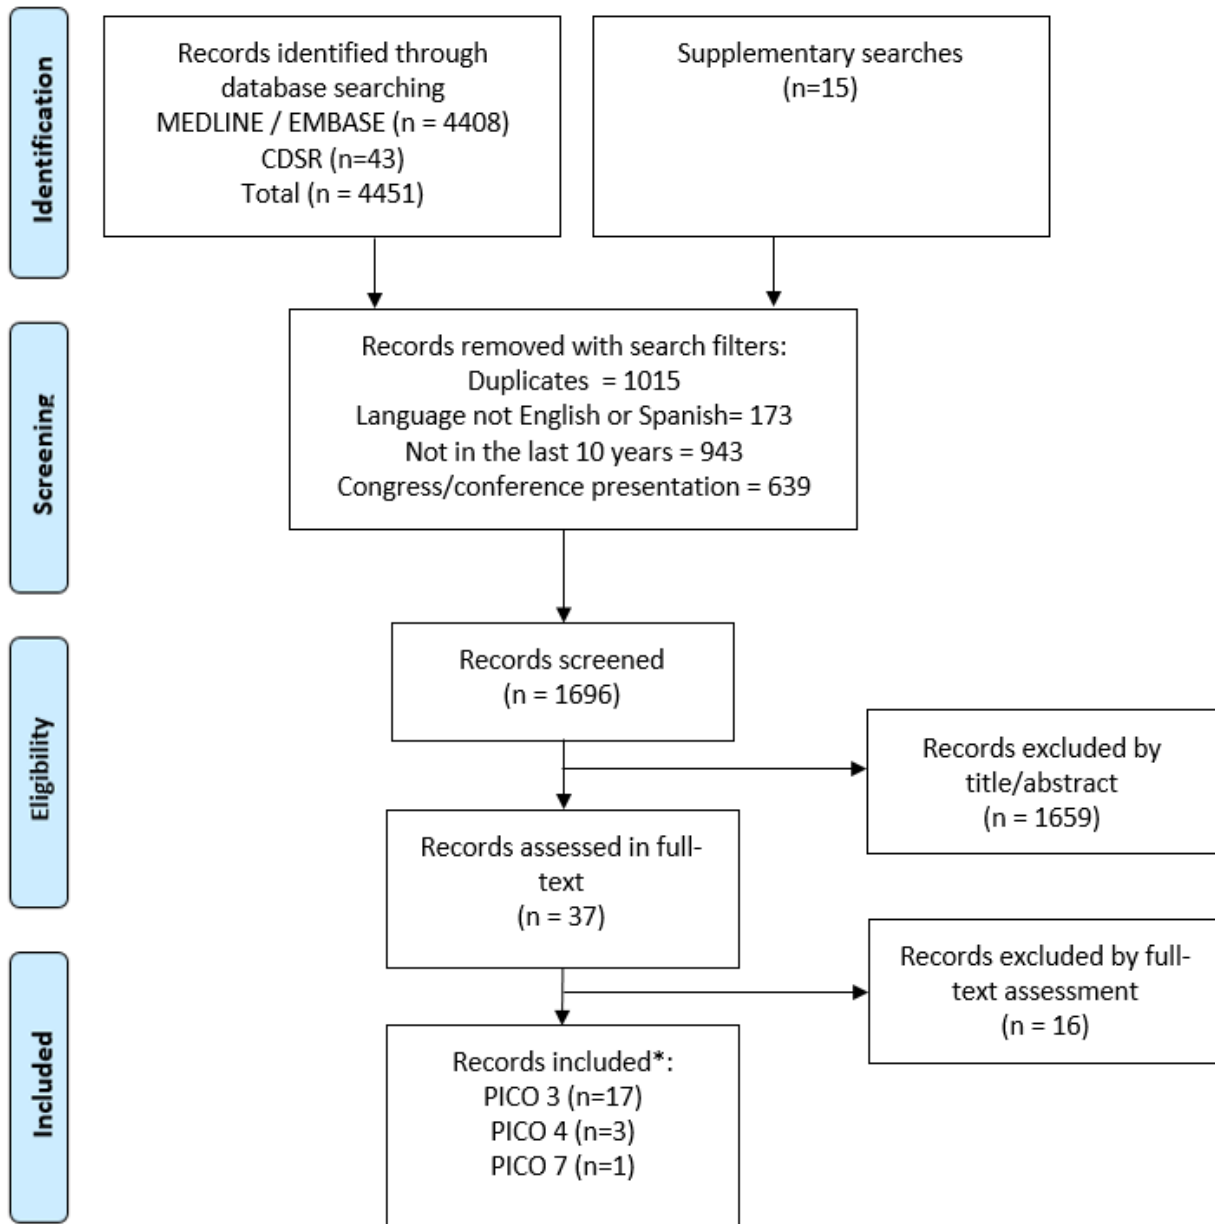

\*For PICO 3,4,7 (concerning antibiotics) one search strategy was used, results of which are presented in one PRISMA Flow Diagram

From: Moher D, Liberati A, Tetzlaff J, Altman DG, The PRISMA Group (2009). Preferred Reporting Items for Systematic Reviews and Meta-Analyses: The PRISMA Statement. PLoS Med 6(7): e1000097. doi:10.1371/journal.pmed1000097

For more information, visit [www.prisma-statement.org](http://www.prisma-statement.org).

Mortality between the groups.

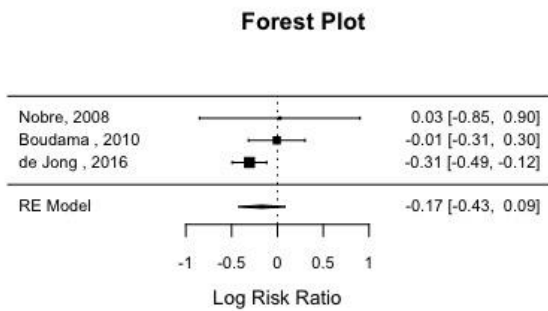

Duration of antibiotic treatment.

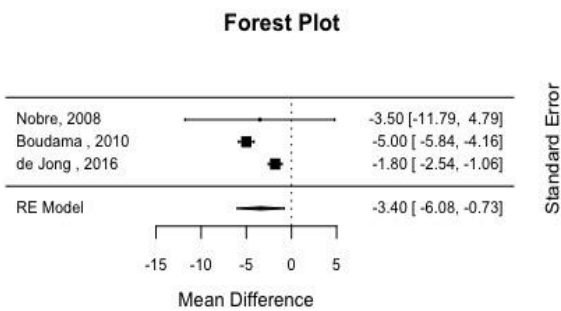

Hospital length of stay (LOS).

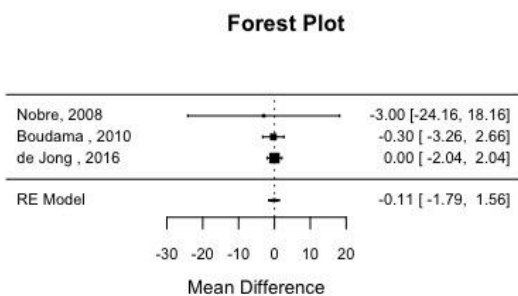

ICU length of stay (LOS).

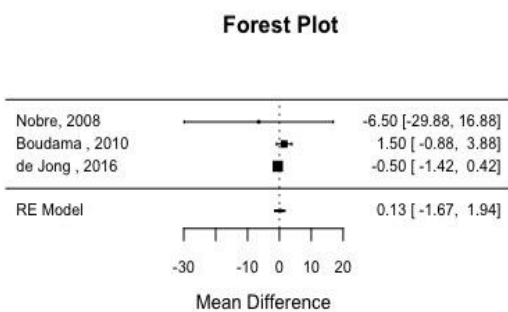

## Evidence Profiles

| Certainty assessment |              |              |               |              |             |                      | No. of patients                   |                                      | Effect            |                   | Certainty | Importance |
|----------------------|--------------|--------------|---------------|--------------|-------------|----------------------|-----------------------------------|--------------------------------------|-------------------|-------------------|-----------|------------|
| No. of studies       | Study design | Risk of bias | Inconsistency | Indirectness | Imprecision | Other considerations | procalcitonin guided AB treatment | control / no PCT guided AB treatment | Relative (95% CI) | Absolute (95% CI) |           |            |

### Mortality

|   |                   |             |             |                      |                      |      |          |          |                                 |  |             |          |
|---|-------------------|-------------|-------------|----------------------|----------------------|------|----------|----------|---------------------------------|--|-------------|----------|
| 3 | randomised trials | not serious | not serious | serious <sup>a</sup> | serious <sup>b</sup> | none | 222/1107 | 268/1139 | Log RR<br>-0.17 (-0.43 to 0.09) |  | ⊕⊕○○<br>LOW | CRITICAL |
|---|-------------------|-------------|-------------|----------------------|----------------------|------|----------|----------|---------------------------------|--|-------------|----------|

### Antibiotic treatment duration

|   |                   |             |             |                      |             |      |     |     |   |                                              |             |          |
|---|-------------------|-------------|-------------|----------------------|-------------|------|-----|-----|---|----------------------------------------------|-------------|----------|
| 3 | randomised trials | not serious | not serious | serious <sup>a</sup> | not serious | none | 879 | 926 | - | MD 3.4 days fewer (6.08 fewer to 0.73 fewer) | ⊕⊕○○<br>LOW | CRITICAL |
|---|-------------------|-------------|-------------|----------------------|-------------|------|-----|-----|---|----------------------------------------------|-------------|----------|

### Hospital length of stay

|   |                   |             |             |                      |                      |      |      |      |   |                                        |             |           |
|---|-------------------|-------------|-------------|----------------------|----------------------|------|------|------|---|----------------------------------------|-------------|-----------|
| 3 | randomised trials | not serious | not serious | serious <sup>a</sup> | serious <sup>b</sup> | none | 1107 | 1139 | - | MD 0.11 days fewer (1.79 to 1.56 more) | ⊕⊕○○<br>LOW | IMPORTANT |
|---|-------------------|-------------|-------------|----------------------|----------------------|------|------|------|---|----------------------------------------|-------------|-----------|

### Intensive care unit (CU) length of stay

| Certainty assessment |                   |              |               |                      |                      |                      | No. of patients                   |                                      | Effect            |                                             | Certainty   | Importance |
|----------------------|-------------------|--------------|---------------|----------------------|----------------------|----------------------|-----------------------------------|--------------------------------------|-------------------|---------------------------------------------|-------------|------------|
| No. of studies       | Study design      | Risk of bias | Inconsistency | Indirectness         | Imprecision          | Other considerations | procalcitonin guided AB treatment | control / no PCT guided AB treatment | Relative (95% CI) | Absolute (95% CI)                           |             |            |
| 3                    | randomised trials | not serious  | not serious   | serious <sup>a</sup> | serious <sup>b</sup> | none                 | 1107                              | 1139                                 | -                 | MD 0.13 days more (1.67 fewer to 1.94 more) | ⊕⊕○○<br>LOW | IMPORTANT  |

CI: Confidence interval; MD: Mean difference

#### Explanations

a. None of the studies specifically included patients with sCAP. Included studies were performed in the ICU at at least 50% of the patients had a suspected lower respiratory tract infection.

b. Wide 95%CI that includes a potential benefit or harm

#### Literature

1. Nobre V, Harbarth S, Graf JD, Rohner P, Pugin J. Use of procalcitonin to shorten antibiotic treatment duration in septic patients: A randomized trial. *Am J Respir Crit Care Med* 2008;177:498–505.
2. Bouadma L, Luyt CE, Tubach F, Cracco C, Alvarez A, Schwebel C, Schortgen F, Lasocki S, Veber B, Dehoux M, Bernard M, Pasquet B, Regnier B, Brun-Buisson C, Chastre J, Wolff M. Use of procalcitonin to reduce patients' exposure to antibiotics in intensive care units (PRORATA trial): a multicentre randomised controlled trial. *Lancet* 2010;375:463–474.
3. de Jong E, van Oers JA, Beishuizen A, Vos P, Vermeijden WJ, Haas LE, Loeff BG, Dormans T, van Melsen GC, Kluiters YC, Kemperman H, van den Elsen MJ, Schouten JA, Streefkerk JO, Krabbe HG, Kieft H, Kluge GH, van Dam VC, van Pelt J, Bormans L, Otten MB, Reidinga AC, Endeman H, Twisk JW, van de Garde EMW, de Smet AMGA, Kesecioglu J, Girbes AR, Nijsten MW, *et al.* Efficacy and safety of procalcitonin guidance in reducing the duration of antibiotic treatment in critically ill patients: A randomised, controlled, open-label trial. *Lancet Infect Dis* 2016;16:819–827.

## Evidence to Decision (EtD) Frameworks

**Question 4.** In patients with sCAP, can serum procalcitonin (PCT) be used to reduce the duration of antibiotic therapy and improve other outcomes in comparison to standard of care not guided by serial biomarker measurements?

|               |                                                                             |
|---------------|-----------------------------------------------------------------------------|
| POPULATION:   | Patients with severe community acquired pneumonia (as defined in the study) |
| INTERVENTION: | Procalcitonin (PCT) guided antibiotic treatment                             |
| COMPARISON:   | Control or no PCT guided treatment                                          |

## ASSESSMENT

| Desirable Effects                                                                                                                                                |                                                                                                                                                                                                                                                                                                                                                                                                                                                                                                                              |                                                                                                                                                                                                                                                                                                                                                                                                                                                                               |
|------------------------------------------------------------------------------------------------------------------------------------------------------------------|------------------------------------------------------------------------------------------------------------------------------------------------------------------------------------------------------------------------------------------------------------------------------------------------------------------------------------------------------------------------------------------------------------------------------------------------------------------------------------------------------------------------------|-------------------------------------------------------------------------------------------------------------------------------------------------------------------------------------------------------------------------------------------------------------------------------------------------------------------------------------------------------------------------------------------------------------------------------------------------------------------------------|
| How substantial are the desirable anticipated effects?                                                                                                           |                                                                                                                                                                                                                                                                                                                                                                                                                                                                                                                              |                                                                                                                                                                                                                                                                                                                                                                                                                                                                               |
| JUDGEMENT                                                                                                                                                        | RESEARCH EVIDENCE                                                                                                                                                                                                                                                                                                                                                                                                                                                                                                            | ADDITIONAL CONSIDERATIONS                                                                                                                                                                                                                                                                                                                                                                                                                                                     |
| <ul style="list-style-type: none"> <li>○ Trivial</li> <li>○ Small</li> <li>○ <b>Moderate</b></li> <li>○ Large</li> <li>○ Varies</li> <li>○ Don't know</li> </ul> | <p>In 3 RCTs including &gt;50% CAP (Nobre, Bouadma L, de Jong):</p> <ul style="list-style-type: none"> <li>-Mean difference in antibiotic duration in PCT arm: -3.4 (-6.08, -0.73) significant</li> <li>-No difference in hospital LOS: -0.11 (-1.79, 1.56)</li> <li>-No difference in ICU length of stay: 0.13 (-1.67, 1.94)</li> <li>-less infection-associated adverse events (7.2% vs. 15% )</li> <li>-lower number of antibiotic days (5 vs. 10 days)</li> <li>-lower mortality at 28-days (15.2% vs 28.2%).</li> </ul> | <p>The guideline panel agreed that the overall clinical benefit in reducing number of days on antibiotic treatment was large/moderate. Although no studies specifically studied severe CAP, the panel selected studies in sepsis including &gt;40% of CAP.</p> <p>Considering the current recommendation of 7 days of antibiotic duration, the absolute benefit might be even less apparent</p> <p>With regard days of length of hospital stay the benefit is no apparent</p> |
| Undesirable Effects                                                                                                                                              |                                                                                                                                                                                                                                                                                                                                                                                                                                                                                                                              |                                                                                                                                                                                                                                                                                                                                                                                                                                                                               |
| How substantial are the undesirable anticipated effects?                                                                                                         |                                                                                                                                                                                                                                                                                                                                                                                                                                                                                                                              |                                                                                                                                                                                                                                                                                                                                                                                                                                                                               |
| JUDGEMENT                                                                                                                                                        | RESEARCH EVIDENCE                                                                                                                                                                                                                                                                                                                                                                                                                                                                                                            | ADDITIONAL CONSIDERATIONS                                                                                                                                                                                                                                                                                                                                                                                                                                                     |

|                                                                                                                                                                                                                                                                         |                                                                                                                                                                                                                                                                                                                                                                                  |                                                                                                                                                                                                                                                                                                                                                                                                                                                                                                                                                                                                                                                            |
|-------------------------------------------------------------------------------------------------------------------------------------------------------------------------------------------------------------------------------------------------------------------------|----------------------------------------------------------------------------------------------------------------------------------------------------------------------------------------------------------------------------------------------------------------------------------------------------------------------------------------------------------------------------------|------------------------------------------------------------------------------------------------------------------------------------------------------------------------------------------------------------------------------------------------------------------------------------------------------------------------------------------------------------------------------------------------------------------------------------------------------------------------------------------------------------------------------------------------------------------------------------------------------------------------------------------------------------|
| <ul style="list-style-type: none"> <li>○ Large</li> <li>○ <b>Moderate</b></li> <li>○ Small</li> <li>○ Trivial</li> <li>○ Varies</li> <li>○ Don't know</li> </ul>                                                                                                        | <p>No difference in mortality: Log RR -0.17 (-0.43, 0.09) (Nobre, Bouadma L and de Jong)</p> <p>Less infection-associated adverse events (Kyriazopoulou): (7.2% vs. 15% )</p>                                                                                                                                                                                                    |                                                                                                                                                                                                                                                                                                                                                                                                                                                                                                                                                                                                                                                            |
| <b>Certainty of evidence</b><br>What is the overall certainty of the evidence of effects?                                                                                                                                                                               |                                                                                                                                                                                                                                                                                                                                                                                  |                                                                                                                                                                                                                                                                                                                                                                                                                                                                                                                                                                                                                                                            |
| JUDGEMENT                                                                                                                                                                                                                                                               | RESEARCH EVIDENCE                                                                                                                                                                                                                                                                                                                                                                | ADDITIONAL CONSIDERATIONS                                                                                                                                                                                                                                                                                                                                                                                                                                                                                                                                                                                                                                  |
| <ul style="list-style-type: none"> <li>○ Very low</li> <li>○ <b>Low</b></li> <li>○ Moderate</li> <li>○ High</li> <li>○ No included studies</li> </ul>                                                                                                                   | <p>A review of literature revealed no studies that specifically studied the role of procalcitonin in limiting antibiotic use in severe CAP patient. Studies performed in the ICU included critically ill populations with sepsis from different organs</p> <p>In 3 RCTs including &gt;50% CAP with two arms comparing PCT with standard care. (Nobre, Bouadma L and de Jong)</p> | <p>Imprecision: studies with a limited sample size, wide 95CI of the effect estimates.</p> <p>Indirectness: None of the studies specifically included patients with sCAP. Included studies were performed in the ICU at least 40% of the patients had a suspected lower respiratory tract infection. Only one study reported outcomes for the subgroup of CAP patients.</p> <p>A potential limitation of benefits of using PCT levels to guide antibiotic duration are also related by the fact that PCT may be not elevated in mixed infections (bacterial plus viral) or intracellular microorganisms such as <i>Legionella</i> or <i>Mycoplasma</i></p> |
| <b>Values</b><br>Is there important uncertainty about or variability in how much people value the main outcomes?                                                                                                                                                        |                                                                                                                                                                                                                                                                                                                                                                                  |                                                                                                                                                                                                                                                                                                                                                                                                                                                                                                                                                                                                                                                            |
| JUDGEMENT                                                                                                                                                                                                                                                               | RESEARCH EVIDENCE                                                                                                                                                                                                                                                                                                                                                                | ADDITIONAL CONSIDERATIONS                                                                                                                                                                                                                                                                                                                                                                                                                                                                                                                                                                                                                                  |
| <ul style="list-style-type: none"> <li>○ Important uncertainty or variability</li> <li>○ Possibly important uncertainty or variability</li> <li>○ <b>Probably no important uncertainty or variability</b></li> <li>○ No important uncertainty or variability</li> </ul> | <p>Not systematically reviewed as a part of this TF</p>                                                                                                                                                                                                                                                                                                                          | <p>There has been small variability on how the panel rated critical outcomes.</p> <p>The guideline panel agreed by consensus that there is possibly important uncertainty or variability in how much people value duration of treatment but less or no uncertainty or variability for mortality outcome.</p>                                                                                                                                                                                                                                                                                                                                               |
| <b>Balance of effects</b><br>Does the balance between desirable and undesirable effects favor the intervention or the comparison?                                                                                                                                       |                                                                                                                                                                                                                                                                                                                                                                                  |                                                                                                                                                                                                                                                                                                                                                                                                                                                                                                                                                                                                                                                            |
| JUDGEMENT                                                                                                                                                                                                                                                               | RESEARCH EVIDENCE                                                                                                                                                                                                                                                                                                                                                                | ADDITIONAL CONSIDERATIONS                                                                                                                                                                                                                                                                                                                                                                                                                                                                                                                                                                                                                                  |

|                                                                                                                                                                                                                                                                                                                       |                                                                                                                                                                                                                                                                                                                                                                                                                                                                                                                                                                                                                                                                              |                                                                                                                                                                                                                                                                                                                                                                                                                                                                                                                |
|-----------------------------------------------------------------------------------------------------------------------------------------------------------------------------------------------------------------------------------------------------------------------------------------------------------------------|------------------------------------------------------------------------------------------------------------------------------------------------------------------------------------------------------------------------------------------------------------------------------------------------------------------------------------------------------------------------------------------------------------------------------------------------------------------------------------------------------------------------------------------------------------------------------------------------------------------------------------------------------------------------------|----------------------------------------------------------------------------------------------------------------------------------------------------------------------------------------------------------------------------------------------------------------------------------------------------------------------------------------------------------------------------------------------------------------------------------------------------------------------------------------------------------------|
| <ul style="list-style-type: none"> <li>○ Favors the comparison</li> <li>○ Probably favors the comparison</li> <li>○ Does not favor either the intervention or the comparison</li> <li>○ <b>Probably favors the intervention</b></li> <li>○ Favors the intervention</li> <li>○ Varies</li> <li>○ Don't know</li> </ul> | <p>The benefits and undesirable effects of PCT guided antibiotic therapy in adult patients with sCAP are presented from severely ill patients with sepsis or septic shock. Benefits for the individual are potentially moderate and for larger society are moderate-to-large, although the evidence relies on sepsis or ICU patients and there is a lack of specific well-conducted investigations for severe CAP.</p> <p>Antibiotic treatment for adults with sCAP, including both the initiation of antibacterial therapy and the duration of therapy, must be weighed against the well-established risks of antibiotics, both to the individual and to wider society.</p> | <p>PCT reduces antibiotic duration without a negative effect on mortality (in Kyriazopoulou study reducing 28-days mortality): although with no impact on hospital or ICU days of stay.</p> <p>The panel considered it likely that most physicians with specific expertise in the care of adult patients with sCAP would undertake antibiotic treatment only when suspicious that the underlying etiology is bacterial and trying to limit the duration of therapy based on local and national guidelines.</p> |
|-----------------------------------------------------------------------------------------------------------------------------------------------------------------------------------------------------------------------------------------------------------------------------------------------------------------------|------------------------------------------------------------------------------------------------------------------------------------------------------------------------------------------------------------------------------------------------------------------------------------------------------------------------------------------------------------------------------------------------------------------------------------------------------------------------------------------------------------------------------------------------------------------------------------------------------------------------------------------------------------------------------|----------------------------------------------------------------------------------------------------------------------------------------------------------------------------------------------------------------------------------------------------------------------------------------------------------------------------------------------------------------------------------------------------------------------------------------------------------------------------------------------------------------|

## Resources required

How large are the resource requirements (costs)?

| JUDGEMENT                                                                                                                                                                                                                             | RESEARCH EVIDENCE                                | ADDITIONAL CONSIDERATIONS                                       |
|---------------------------------------------------------------------------------------------------------------------------------------------------------------------------------------------------------------------------------------|--------------------------------------------------|-----------------------------------------------------------------|
| <ul style="list-style-type: none"> <li>○ Large costs</li> <li>○ <b>Moderate costs</b></li> <li>○ Negligible costs and savings</li> <li>○ Moderate savings</li> <li>○ Large savings</li> <li>○ Varies</li> <li>○ Don't know</li> </ul> | Not systematically reviewed as a part of this TF | Cost of SERIAL measurements might be an issue in some countries |

## Cost effectiveness

Does the cost-effectiveness of the intervention favor the intervention or the comparison?

| JUDGEMENT                                                                                                                                                                                                                                                                                                                      | RESEARCH EVIDENCE                                | ADDITIONAL CONSIDERATIONS |
|--------------------------------------------------------------------------------------------------------------------------------------------------------------------------------------------------------------------------------------------------------------------------------------------------------------------------------|--------------------------------------------------|---------------------------|
| <ul style="list-style-type: none"> <li>○ Favors the comparison</li> <li>○ Probably favors the comparison</li> <li>○ Does not favor either the intervention or the comparison</li> <li>○ Probably favors the intervention</li> <li>○ Favors the intervention</li> <li>○ Varies</li> <li>○ <b>No included studies</b></li> </ul> | Not systematically reviewed as a part of this TF |                           |

## Equity

What would be the impact on health equity?

| JUDGEMENT                                                                                                                    | RESEARCH EVIDENCE                                | ADDITIONAL CONSIDERATIONS                                                |
|------------------------------------------------------------------------------------------------------------------------------|--------------------------------------------------|--------------------------------------------------------------------------|
| <ul style="list-style-type: none"> <li>○ Reduced</li> <li>○ Probably reduced</li> <li>○ <b>Probably no impact</b></li> </ul> | Not systematically reviewed as a part of this TF | The panel agreed by consensus that there is probably no impact on equity |



|                                                                                                                                                                                                                        |                                                  |                                                                                                                                                    |
|------------------------------------------------------------------------------------------------------------------------------------------------------------------------------------------------------------------------|--------------------------------------------------|----------------------------------------------------------------------------------------------------------------------------------------------------|
| <input type="radio"/> Probably increased<br><input type="radio"/> Increased<br><input type="radio"/> Varies<br><input type="radio"/> Don't know                                                                        |                                                  |                                                                                                                                                    |
| <b>Acceptability</b><br>Is the intervention acceptable to key stakeholders?                                                                                                                                            |                                                  |                                                                                                                                                    |
| JUDGEMENT                                                                                                                                                                                                              | RESEARCH EVIDENCE                                | ADDITIONAL CONSIDERATIONS                                                                                                                          |
| <input type="radio"/> No<br><input type="radio"/> Probably no<br><input checked="" type="radio"/> <b>Probably yes</b><br><input type="radio"/> Yes<br><input type="radio"/> Varies<br><input type="radio"/> Don't know | Not systematically reviewed as a part of this TF | The panel considered that the intervention probably would be accepted                                                                              |
| <b>Feasibility</b><br>Is the intervention feasible to implement?                                                                                                                                                       |                                                  |                                                                                                                                                    |
| JUDGEMENT                                                                                                                                                                                                              | RESEARCH EVIDENCE                                | ADDITIONAL CONSIDERATIONS                                                                                                                          |
| <input type="radio"/> No<br><input type="radio"/> Probably no<br><input checked="" type="radio"/> <b>Probably yes</b><br><input type="radio"/> Yes<br><input type="radio"/> Varies<br><input type="radio"/> Don't know | Not systematically reviewed as a part of this TF | Although PCT might not be available in all centers the panel agree that PCT is a biomarker well known and widely used in sepsis / other infections |

## TYPE OF RECOMMENDATION

|                                                |                                                     |                                                                          |                                                        |                                            |
|------------------------------------------------|-----------------------------------------------------|--------------------------------------------------------------------------|--------------------------------------------------------|--------------------------------------------|
| Strong recommendation against the intervention | Conditional recommendation against the intervention | Conditional recommendation for either the intervention or the comparison | <b>Conditional recommendation for the intervention</b> | Strong recommendation for the intervention |
| ○                                              | ○                                                   | ○                                                                        | ●                                                      | ○                                          |

## CONCLUSIONS

### Recommendation

We suggest the use of PCT to reduce the duration of antibiotic days in patients with sCAP (conditional recommendation, low quality of evidence)

Question 5. Should oseltamivir be added to standard therapy in patients with sCAP and confirmed influenza?

**PRISMA Flow Diagram**

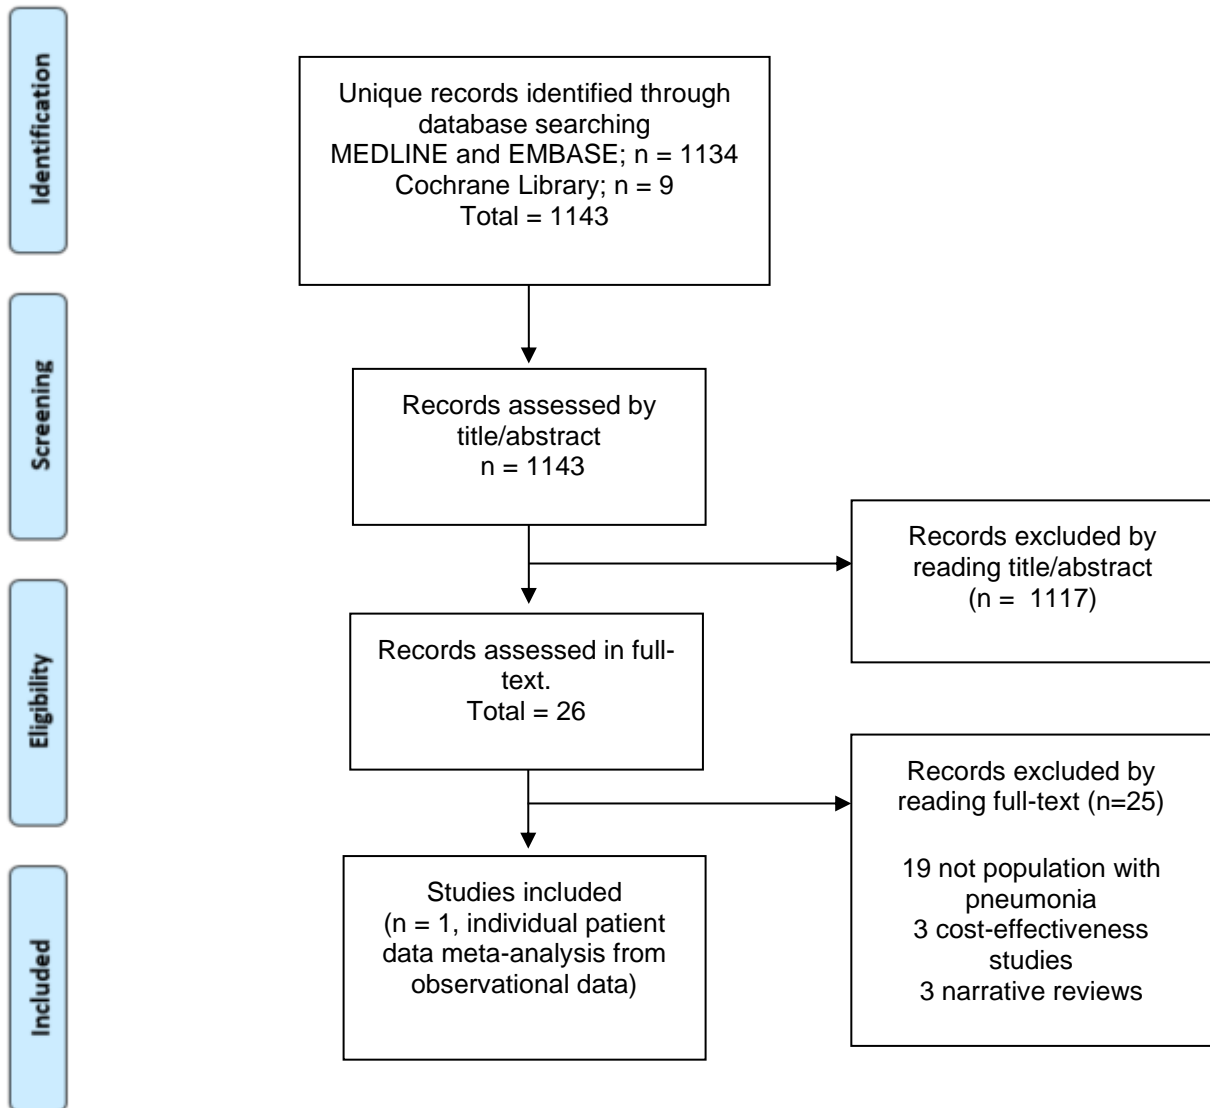

From: Moher D, Liberati A, Tetzlaff J, Altman DG, The PRISMA Group (2009). Preferred Reporting Items for Systematic Reviews and Meta-Analyses: The PRISMA Statement. PLoS Med 6(7): e1000097. doi:10.1371/journal.pmed1000097

For more information, visit [www.prisma-statement.org](http://www.prisma-statement.org).

## Evidence profiles

**Setting defined by the ERS:** Not defined. **Study setting:** Mixed population (76% adults, 8% immunocompromised) with CAP admitted for inpatient treatment in 38 countries.

**Empiric neuraminidase inhibitors (NI) compared to control for sCAP and suspected influenza**

| Certainty assessment |              |              |               |              |             |                      | No of patients                   |         | Effect            |                   | Certainty | Importance |
|----------------------|--------------|--------------|---------------|--------------|-------------|----------------------|----------------------------------|---------|-------------------|-------------------|-----------|------------|
| No of studies        | Study design | Risk of bias | Inconsistency | Indirectness | Imprecision | Other considerations | empiric neuraminidase inhibitors | control | Relative (95% CI) | Absolute (95% CI) |           |            |

### Intubation

|                |                       |                           |             |                      |             |      |        |       |                                  |                                                                      |                  |          |
|----------------|-----------------------|---------------------------|-------------|----------------------|-------------|------|--------|-------|----------------------------------|----------------------------------------------------------------------|------------------|----------|
| 1 <sup>1</sup> | observational studies | very serious <sup>a</sup> | not serious | serious <sup>b</sup> | not serious | none | -/5396 | -/582 | <b>RR 1.67</b><br>(1.22 to 2.29) | <b>266 more per 1,000</b><br>(from 87 more to 512 more) <sup>c</sup> | ⊕○○○<br>Very low | CRITICAL |
|----------------|-----------------------|---------------------------|-------------|----------------------|-------------|------|--------|-------|----------------------------------|----------------------------------------------------------------------|------------------|----------|

### ARDS

|                |                       |                           |             |                      |                      |      |        |       |                                  |                                                                     |                  |          |
|----------------|-----------------------|---------------------------|-------------|----------------------|----------------------|------|--------|-------|----------------------------------|---------------------------------------------------------------------|------------------|----------|
| 1 <sup>1</sup> | observational studies | very serious <sup>a</sup> | not serious | serious <sup>b</sup> | serious <sup>d</sup> | none | -/5396 | -/582 | <b>RR 2.13</b><br>(0.87 to 5.21) | <b>50 more per 1,000</b><br>(from 6 fewer to 188 more) <sup>e</sup> | ⊕○○○<br>Very low | CRITICAL |
|----------------|-----------------------|---------------------------|-------------|----------------------|----------------------|------|--------|-------|----------------------------------|---------------------------------------------------------------------|------------------|----------|

### Hospital mortality

| Certainty assessment |                       |                        |               |                      |                      |                      | № of patients                    |         | Effect                           |                                                                      | Certainty        | Importance |
|----------------------|-----------------------|------------------------|---------------|----------------------|----------------------|----------------------|----------------------------------|---------|----------------------------------|----------------------------------------------------------------------|------------------|------------|
| № of studies         | Study design          | Risk of bias           | Inconsistency | Indirectness         | Imprecision          | Other considerations | empiric neuraminidase inhibitors | control | Relative (95% CI)                | Absolute (95% CI)                                                    |                  |            |
| 1 <sup>1</sup>       | observational studies | serious <sup>a,f</sup> | not serious   | serious <sup>b</sup> | serious <sup>d</sup> | none                 | -/5396                           | -/582   | <b>RR 0.90</b><br>(0.67 to 1.21) | <b>15 fewer per 1,000</b><br>(from 50 fewer to 32 more) <sup>g</sup> | ⊕○○○<br>Very low | CRITICAL   |

#### Mortality (early vs late NIs treatment)

|                |                       |                      |             |                      |             |      |        |        |                                  |                                                                       |                  |          |
|----------------|-----------------------|----------------------|-------------|----------------------|-------------|------|--------|--------|----------------------------------|-----------------------------------------------------------------------|------------------|----------|
| 1 <sup>1</sup> | observational studies | serious <sup>h</sup> | not serious | serious <sup>i</sup> | not serious | none | -/1067 | -/2843 | <b>RR 0.70</b><br>(0.55 to 0.88) | <b>45 fewer per 1,000</b><br>(from 68 fewer to 18 fewer) <sup>g</sup> | ⊕○○○<br>Very low | CRITICAL |
|----------------|-----------------------|----------------------|-------------|----------------------|-------------|------|--------|--------|----------------------------------|-----------------------------------------------------------------------|------------------|----------|

#### ICU admission

|                |                       |                           |             |                      |             |      |        |       |                                  |                                                                       |                  |           |
|----------------|-----------------------|---------------------------|-------------|----------------------|-------------|------|--------|-------|----------------------------------|-----------------------------------------------------------------------|------------------|-----------|
| 1 <sup>1</sup> | observational studies | very serious <sup>a</sup> | not serious | serious <sup>b</sup> | not serious | none | -/5396 | -/582 | <b>RR 1.59</b><br>(1.21 to 2.09) | <b>329 more per 1,000</b><br>(from 117 more to 609 more) <sup>j</sup> | ⊕○○○<br>Very low | IMPORTANT |
|----------------|-----------------------|---------------------------|-------------|----------------------|-------------|------|--------|-------|----------------------------------|-----------------------------------------------------------------------|------------------|-----------|

**CI:** confidence interval; **RR:** risk ratio

### ***Explanations***

- a. Serious limitation due to retrospective design and inherent unmeasured confounding. Confounding by indication is relevant because those more severe cases (managed in ICU, intubated or with ARDS) were more likely to be managed with NIs. Large number of patients loss of follow-up (16% for unknown intervention exposure; 17,5% unknown pneumonia status)
- b. The population does not include sCAP patients receiving empiric NIs but patients with radiologically confirmed influenza related pneumonia who received NIs or not. Population includes adult (76%) and children (24%) and severity of pneumonia is not known.
- c. Numbers of events distribution among intervention and control groups are not known however the overall incidence of intubation (mechanical ventilation) in IRP patients was 39.7%
- d. Wide 95%CI that includes large benefits or harm
- e. Numbers of events distribution among intervention and control groups are not known however the overall incidence of ARDS in IRP patients was 4.4%
- f. Serious limitation due to retrospective design and inherent unmeasured confounding, small risk of confounding by indication. Large number of patients lost of follow-up (16% for unknown intervention exposure; 17,5% unknown pneumonia status)
- g. Numbers of events distribution among intervention and control groups are not known however the overall death rate in IRP patients was 15.1%
- h. Serious limitation due to retrospective design and inherent unmeasured confounding, no risk of confounding by indication since all received NIs. Large number of patients lost of follow-up (16% for unknown intervention exposure; 17,5% unknown pneumonia status)
- i. The population does not include sCAP patients receiving empiric NIs but patients with radiologically confirmed influenza related pneumonia who received NIs. Population includes adult (76%) and children (24%) and severity of pneumonia is not known.
- j. Numbers of events distribution among intervention and control groups are not known however the overall incidence of ICU admission in IRP patients was 55.8%

### ***References***

1. Muthuri, S. G., Venkatesan, S., Myles, P. R., Leonardi-Bee, J., Lim, W. S., Al Mamun, A., Anovadiya, A. P., Araujo, W. N., Azziz-Baumgartner, E., Baez, C., Bantar, C., Barhoush, M. M., Bassetti, M., Beovic, B., Bingisser, R., Bonmarin, I., Borja-Aburto, V. H., Cao, B., Carratala, J., Cuezco, M. R., Denholm, J. T., Dominguez, S. R., Duarte, P. A., Dubnov-Raz, G., Echavarria, M., Fanella, S., Fraser, J., Gao, Z., Gerardin, P., Giannella, M., Gubbels, S., Herberg, J., Higuera Iglesias, A. L., Hoeger, P. H., Hoffmann, M., Hu, X., Islam, Q. T., Jimenez, M. F., Kandeel, A., Keijzers, G., Khalili, H., Khandaker, G., Knight, M., Kuszniarz, G., Kuzman, I., Kwan, A. M., Lahlou Amine, I., Langenegger, E., Lankarani, K. B., Leo, Y. S., Linko, R., Liu, P., Madanat, F., Manabe, T., Mayo-Montero, E., McGeer, A., Memish, Z. A., Metan, G., Mikic, D., Mohn, K. G., Moradi, A., Nymadawa, P., Ozbay, B., Ozkan, M., Parekh, D., Paul, M., Poepl, W., Polack, F. P., Rath, B. A., Rodriguez, A. H., Siqueira, M. M., Skret-Magierlo, J., Talarek, E., Tang, J. W., Torres, A., Torun, S. H., Tran, D., Uyeki, T. M., van Zwol, A., Vaudry, W., Velyvyte, D., Vidmar, T., Zarogoulidis, P., Investigators, Pride Consortium, Nguyen-Van-Tam, J. S.. Impact of neuraminidase inhibitors on influenza A(H1N1)pdm09-related pneumonia: an individual participant data meta-analysis. *Influenza Other Respir Viruses*; 2016.

## Evidence to Decision (EtD) Frameworks

| Question 5: Should oseltamivir be added to standard therapy in patients with sCAP and confirmed influenza? |                                                                                                      |
|------------------------------------------------------------------------------------------------------------|------------------------------------------------------------------------------------------------------|
| POPULATION:                                                                                                | Patients with severe community acquired pneumonia (as defined in the study)                          |
| INTERVENTION:                                                                                              | empiric neuraminidase inhibitors                                                                     |
| COMPARISON:                                                                                                | control / placebo / no treatment                                                                     |
| MAIN OUTCOMES:                                                                                             | Intubation at 28 days, ICU mortality, Hospital mortality, Mortality at 28 days, Mortality at 90 days |
| SETTING:                                                                                                   | Hospital                                                                                             |
| PERSPECTIVE:                                                                                               |                                                                                                      |

## ASSESSMENT

| Desirable Effects                                                                                                                                                                                                   |                                                                                                                                                                        |                                                                                                                                                                                                                                                                                                                                                                  |
|---------------------------------------------------------------------------------------------------------------------------------------------------------------------------------------------------------------------|------------------------------------------------------------------------------------------------------------------------------------------------------------------------|------------------------------------------------------------------------------------------------------------------------------------------------------------------------------------------------------------------------------------------------------------------------------------------------------------------------------------------------------------------|
| How substantial are the desirable anticipated effects?                                                                                                                                                              |                                                                                                                                                                        |                                                                                                                                                                                                                                                                                                                                                                  |
| JUDGEMENT                                                                                                                                                                                                           | RESEARCH EVIDENCE                                                                                                                                                      | ADDITIONAL CONSIDERATIONS                                                                                                                                                                                                                                                                                                                                        |
| <input type="radio"/> Trivial<br><input checked="" type="radio"/> <b>Small</b><br><input type="radio"/> Moderate<br><input type="radio"/> Large<br><input type="radio"/> Varies<br><input type="radio"/> Don't know | Patients with severe community acquired pneumonia (as defined in the study) with empiric neuraminidase inhibitors control / placebo / no treatment. No RCTs were found | individual patient data meta-analysis from 2014 including only observational data found that oseltamivir or zanamivir in comparison to non-treated patients oseltamivir reduced mortality<br><br>High prevalence of viral (influenza) CAP during season, both bacterial and viral infections are common.<br><br>Mortality of Influenza pneumonia in ICU is high. |
| Undesirable Effects                                                                                                                                                                                                 |                                                                                                                                                                        |                                                                                                                                                                                                                                                                                                                                                                  |
| How substantial are the undesirable anticipated effects?                                                                                                                                                            |                                                                                                                                                                        |                                                                                                                                                                                                                                                                                                                                                                  |
| JUDGEMENT                                                                                                                                                                                                           | RESEARCH EVIDENCE                                                                                                                                                      | ADDITIONAL CONSIDERATIONS                                                                                                                                                                                                                                                                                                                                        |

|                                                                                                                                                                  |                                                                                                                                                                               |                                                                                                                     |
|------------------------------------------------------------------------------------------------------------------------------------------------------------------|-------------------------------------------------------------------------------------------------------------------------------------------------------------------------------|---------------------------------------------------------------------------------------------------------------------|
| <ul style="list-style-type: none"> <li>○ Large</li> <li>○ Moderate</li> <li>○ Small</li> <li><b>x Trivial</b></li> <li>○ Varies</li> <li>○ Don't know</li> </ul> | <p>Patients with severe community acquired pneumonia (as defined in the study) with empiric neuraminidase inhibitors control / placebo / no treatment. No RCTs were found</p> | <p>Not an important issue.</p> <p>Risks are anticipated to be trivial.</p> <p>Reported side effects are nausea.</p> |
|------------------------------------------------------------------------------------------------------------------------------------------------------------------|-------------------------------------------------------------------------------------------------------------------------------------------------------------------------------|---------------------------------------------------------------------------------------------------------------------|

## Certainty of evidence

What is the overall certainty of the evidence of effects?

| JUDGEMENT                                                                                                                                             | RESEARCH EVIDENCE                                                                                                                                                             | ADDITIONAL CONSIDERATIONS                                                                                                                                                                                                                                     |
|-------------------------------------------------------------------------------------------------------------------------------------------------------|-------------------------------------------------------------------------------------------------------------------------------------------------------------------------------|---------------------------------------------------------------------------------------------------------------------------------------------------------------------------------------------------------------------------------------------------------------|
| <ul style="list-style-type: none"> <li><b>x Very low</b></li> <li>○ Low</li> <li>○ Moderate</li> <li>○ High</li> <li>○ No included studies</li> </ul> | <p>Patients with severe community acquired pneumonia (as defined in the study) with empiric neuraminidase inhibitors control / placebo / no treatment. No RCTs were found</p> | <p>Very low quality, data from observational evidence, serious</p> <p>Risk of bias due to confounding by indication.</p> <p>No real direct data answering the question. Only individual patient data meta-analysis from including only observational data</p> |

## Values

Is there important uncertainty about or variability in how much people value the main outcomes?

| JUDGEMENT                                                                                                                                                                                                                                                               | RESEARCH EVIDENCE                                       | ADDITIONAL CONSIDERATIONS                                                                                                                                                                                                                                                                                                        |
|-------------------------------------------------------------------------------------------------------------------------------------------------------------------------------------------------------------------------------------------------------------------------|---------------------------------------------------------|----------------------------------------------------------------------------------------------------------------------------------------------------------------------------------------------------------------------------------------------------------------------------------------------------------------------------------|
| <ul style="list-style-type: none"> <li>○ Important uncertainty or variability</li> <li>○ Possibly important uncertainty or variability</li> <li>○ <b>Probably no important uncertainty or variability</b></li> <li>○ No important uncertainty or variability</li> </ul> | <p>Not systematically reviewed as a part of this TF</p> | <p>In general, it would be likely that severely ill patients value potential benefit from a therapy without significant risks and doctors would also value potential benefit at acceptable cost and without significant risks. However, if the drug is ineffective any side effect is likely to be unacceptable to patients.</p> |

## Balance of effects

Does the balance between desirable and undesirable effects favor the intervention or the comparison?

| JUDGEMENT | RESEARCH EVIDENCE | ADDITIONAL CONSIDERATIONS |
|-----------|-------------------|---------------------------|
|-----------|-------------------|---------------------------|

|                                                                                                                                                                                                                                                                                                                |                                                                                                                                                                                                                                                                                                                                                                                                                                                                                                                                                                              |                                                                       |
|----------------------------------------------------------------------------------------------------------------------------------------------------------------------------------------------------------------------------------------------------------------------------------------------------------------|------------------------------------------------------------------------------------------------------------------------------------------------------------------------------------------------------------------------------------------------------------------------------------------------------------------------------------------------------------------------------------------------------------------------------------------------------------------------------------------------------------------------------------------------------------------------------|-----------------------------------------------------------------------|
| <ul style="list-style-type: none"> <li>x Favors the comparison</li> <li>o Probably favors the comparison</li> <li>o Does not favor either the intervention or the comparison</li> <li>o Probably favors the intervention</li> <li>o Favors the intervention</li> <li>o Varies</li> <li>o Don't know</li> </ul> | <p>For patients with severe CAP due to Influenza confirmed by PCR, we suggest oseltamivir as part of the treatment. (Conditional recommendation, very low quality of evidence)</p> <p>When PCR is not available to confirm influenza, oseltamivir should be considered during the Influenza season. (Conditional recommendation, very low quality of evidence).</p> <p>Due to the lack of convincing evidence, future studies are needed to evaluate duration and the effectiveness of oseltamivir regarding the empiric use of oseltamivir in suspected influenza sCAP.</p> | <p>Importantly that this recommendation is to confirmed influenza</p> |
|----------------------------------------------------------------------------------------------------------------------------------------------------------------------------------------------------------------------------------------------------------------------------------------------------------------|------------------------------------------------------------------------------------------------------------------------------------------------------------------------------------------------------------------------------------------------------------------------------------------------------------------------------------------------------------------------------------------------------------------------------------------------------------------------------------------------------------------------------------------------------------------------------|-----------------------------------------------------------------------|

## Resources required

How large are the resource requirements (costs)?

| JUDGEMENT                                                                                                                                                                                                                             | RESEARCH EVIDENCE                                       | ADDITIONAL CONSIDERATIONS                                                                                                                                                                                                                                                                                                                                                                                                                                                                                                                                                                     |
|---------------------------------------------------------------------------------------------------------------------------------------------------------------------------------------------------------------------------------------|---------------------------------------------------------|-----------------------------------------------------------------------------------------------------------------------------------------------------------------------------------------------------------------------------------------------------------------------------------------------------------------------------------------------------------------------------------------------------------------------------------------------------------------------------------------------------------------------------------------------------------------------------------------------|
| <ul style="list-style-type: none"> <li>o Large costs</li> <li>o Moderate costs</li> <li>o Negligible costs and savings</li> <li>o Moderate savings</li> <li>o Large savings</li> <li>o Varies</li> <li>o <b>Don't know</b></li> </ul> | <p>Not systematically reviewed as a part of this TF</p> | <p>Depending on the perspective of health care costs (LMIC versus HIC) the cost of the intervention is low, it is simple, does not require monitoring for the intervention and does not take much time. However, especially in patient-surges, saving the drug for populations where it has been shown to work seems logical.</p> <p>Even though treatment might seem defensible in the absence of evidence given the good safety profile and acceptable costs, it comes with non-marginal costs to the scientific community and may halt progress in development of new antiviral drugs.</p> |

## Cost effectiveness

Does the cost-effectiveness of the intervention favor the intervention or the comparison?

| JUDGEMENT                                                                                                                                                                                                                                                                                                                      | RESEARCH EVIDENCE                                       | ADDITIONAL CONSIDERATIONS                                                                                                                                                                                                                                                                                                                                                                                                                                                                                                                                                 |
|--------------------------------------------------------------------------------------------------------------------------------------------------------------------------------------------------------------------------------------------------------------------------------------------------------------------------------|---------------------------------------------------------|---------------------------------------------------------------------------------------------------------------------------------------------------------------------------------------------------------------------------------------------------------------------------------------------------------------------------------------------------------------------------------------------------------------------------------------------------------------------------------------------------------------------------------------------------------------------------|
| <ul style="list-style-type: none"> <li>o Favors the comparison</li> <li>o Probably favors the comparison</li> <li>o Does not favor either the intervention or the comparison</li> <li>o Probably favors the intervention</li> <li>o Favors the intervention</li> <li>o Varies</li> <li>o <b>No included studies</b></li> </ul> | <p>Not systematically reviewed as a part of this TF</p> | <p>Even though a recommendation in favour of oseltamivir might seem defensible in the absence of evidence given the good safety profile and acceptable costs, it comes with non-marginal costs for the scientific community and may halt progress in developing new antiviral drugs. As a result of the current recommendations, conducting high-quality randomised clinical trials on the effectivity of oseltamivir in the ICU is challenging as the control group would be withheld a drug that is recommended in guidelines. Furthermore, new drugs must be found</p> |



|                                                                                                                                                                                                                                                                                          |                                                  |                                                                                                            |
|------------------------------------------------------------------------------------------------------------------------------------------------------------------------------------------------------------------------------------------------------------------------------------------|--------------------------------------------------|------------------------------------------------------------------------------------------------------------|
|                                                                                                                                                                                                                                                                                          |                                                  | superior to oseltamivir to be registered for treatment of the disease as per FDA and EMA regulations.      |
| <b>Equity</b><br>What would be the impact on health equity?                                                                                                                                                                                                                              |                                                  |                                                                                                            |
| <b>JUDGEMENT</b>                                                                                                                                                                                                                                                                         | <b>RESEARCH EVIDENCE</b>                         | <b>ADDITIONAL CONSIDERATIONS</b>                                                                           |
| <input type="radio"/> Reduced<br><input checked="" type="radio"/> <b>Probably reduced</b><br><input type="radio"/> Probably no impact<br><input type="radio"/> Probably increased<br><input type="radio"/> Increased<br><input type="radio"/> Varies<br><input type="radio"/> Don't know | Not systematically reviewed as a part of this TF | If the intervention is unaffordable for countries, despite the relatively low cost, it could reduce equity |
| <b>Acceptability</b><br>Is the intervention acceptable to key stakeholders?                                                                                                                                                                                                              |                                                  |                                                                                                            |
| <b>JUDGEMENT</b>                                                                                                                                                                                                                                                                         | <b>RESEARCH EVIDENCE</b>                         | <b>ADDITIONAL CONSIDERATIONS</b>                                                                           |
| <input type="radio"/> No<br><input type="radio"/> Probably no<br><input type="radio"/> Probably yes<br><input checked="" type="radio"/> <b>Yes</b><br><input type="radio"/> Varies<br><input type="radio"/> Don't know                                                                   | Not systematically reviewed as a part of this TF | Oral drug with few side effects                                                                            |
| <b>Feasibility</b><br>Is the intervention feasible to implement?                                                                                                                                                                                                                         |                                                  |                                                                                                            |
| <b>JUDGEMENT</b>                                                                                                                                                                                                                                                                         | <b>RESEARCH EVIDENCE</b>                         | <b>ADDITIONAL CONSIDERATIONS</b>                                                                           |
| <input type="radio"/> No<br><input type="radio"/> Probably no<br><input type="radio"/> Probably yes<br><input checked="" type="radio"/> <b>Yes</b><br><input type="radio"/> Varies<br><input type="radio"/> Don't know                                                                   | Not systematically reviewed as a part of this TF | Oral drug with few side effects                                                                            |

## TYPE OF RECOMMENDATION

|                                                         |                                                              |                                                                                   |                                                                 |                                                     |
|---------------------------------------------------------|--------------------------------------------------------------|-----------------------------------------------------------------------------------|-----------------------------------------------------------------|-----------------------------------------------------|
| Strong recommendation against the intervention<br><br>○ | Conditional recommendation against the intervention<br><br>○ | Conditional recommendation for either the intervention or the comparison<br><br>○ | <b>Conditional recommendation for the intervention</b><br><br>● | Strong recommendation for the intervention<br><br>○ |
|---------------------------------------------------------|--------------------------------------------------------------|-----------------------------------------------------------------------------------|-----------------------------------------------------------------|-----------------------------------------------------|

## CONCLUSIONS

### Recommendation

*We suggest the use of oseltamivir for patients with sCAP due to influenza confirmed by PCR (conditional recommendation, very low quality of evidence)*

*When PCR is not available to confirm influenza, we suggest the use of empirical oseltamivir during the influenza season (conditional recommendation, very low quality of evidence).*

Question 6. Does the addition of steroids to antibiotic therapy in specific sCAP populations lead to better outcomes in comparison to when steroid therapy is not used?

#### PRISMA Flow Diagram

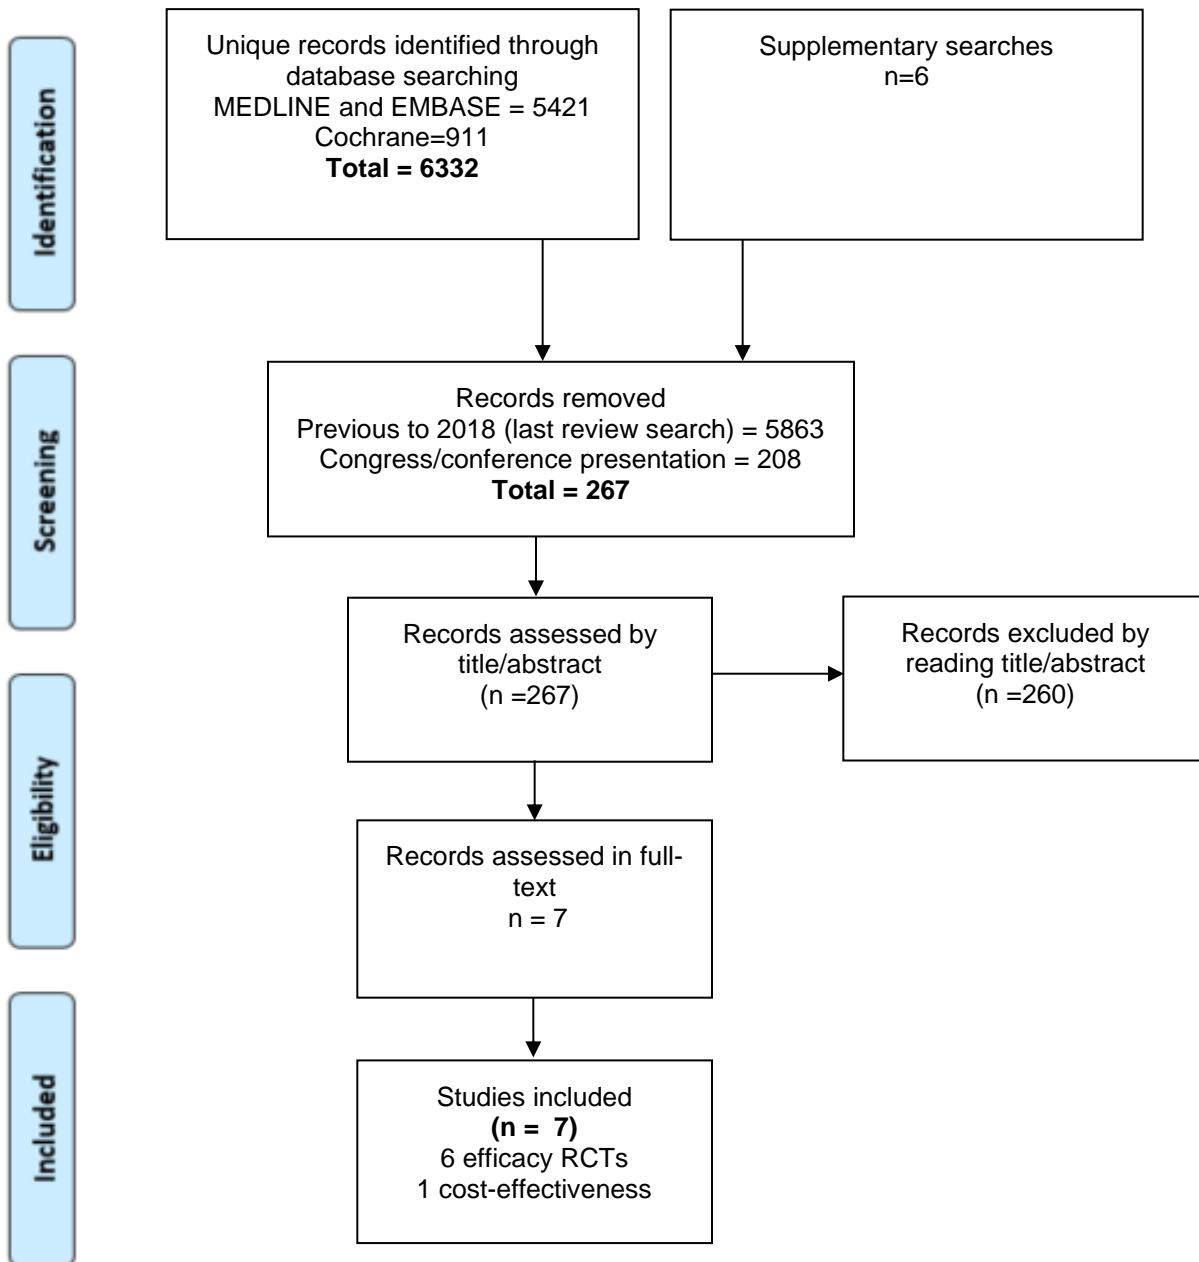

From: Moher D, Liberati A, Tetzlaff J, Altman DG, The PRISMA Group (2009). Preferred Reporting Items for Systematic Reviews and Meta-Analyses: The PRISMA Statement. PLoS Med 6(7): e1000097. doi:10.1371/journal.pmed1000097

For more information, visit [www.prisma-statement.org](http://www.prisma-statement.org).

## Forest plots.

### 60-day mortality

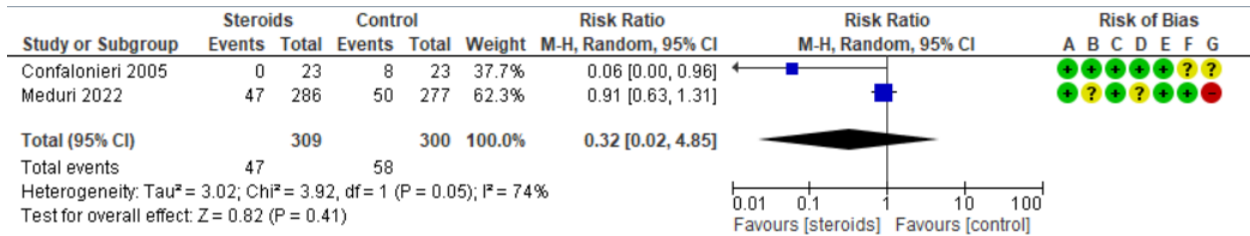

### Mortality (ICU mortality)

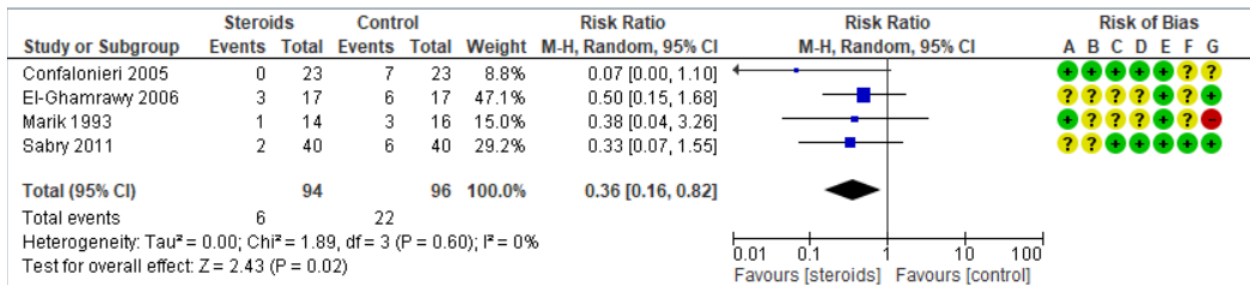

### Hospital Mortality

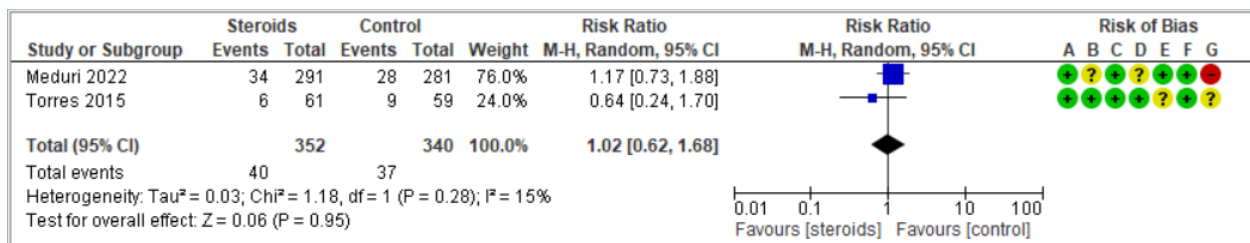

## Shock

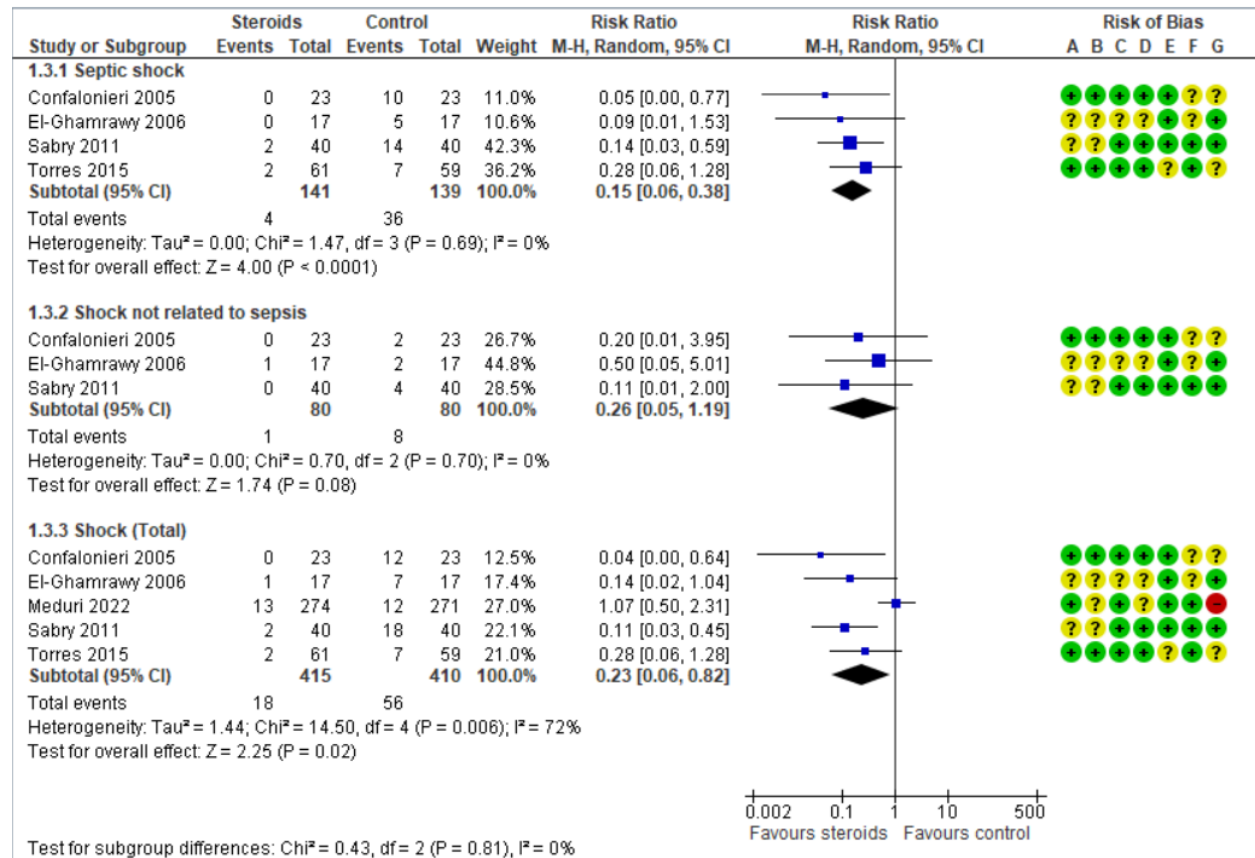

## Acute Respiratory Distress Syndrome

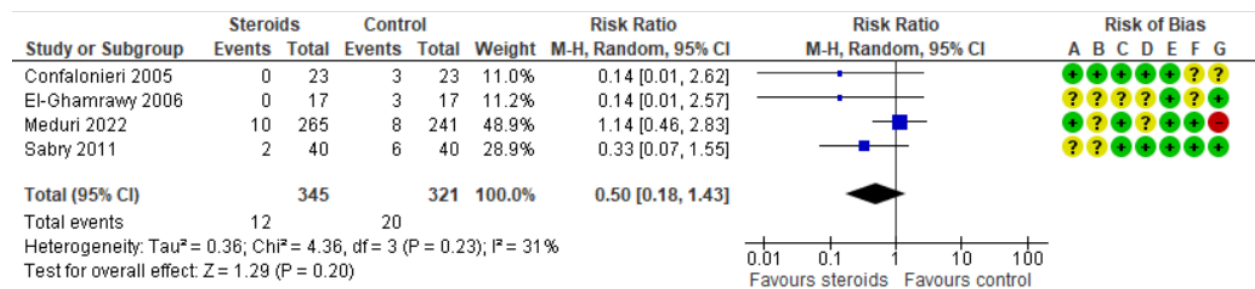

## Mechanical ventilation free days (by day 8)

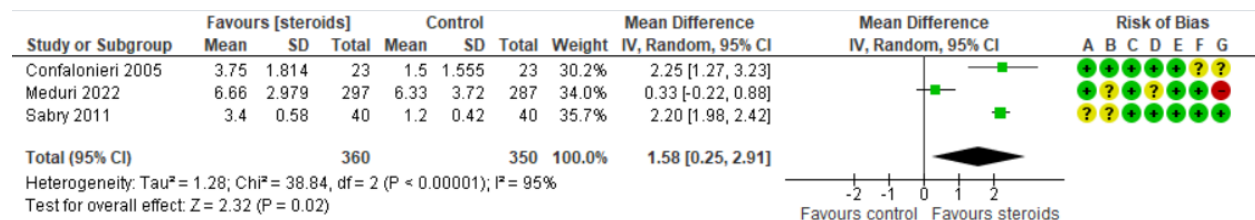

Confalonieri 2005: results reported in medians (range), estimation of means was calculated as proposed by Wan et al. 2014 (scenario 1).

Meduri 2022: Days on MV reported by Median (range). Estimation of means was calculated as proposed by Wan et al. 2014 (scenario 1)

## Duration of mechanical ventilation (days)

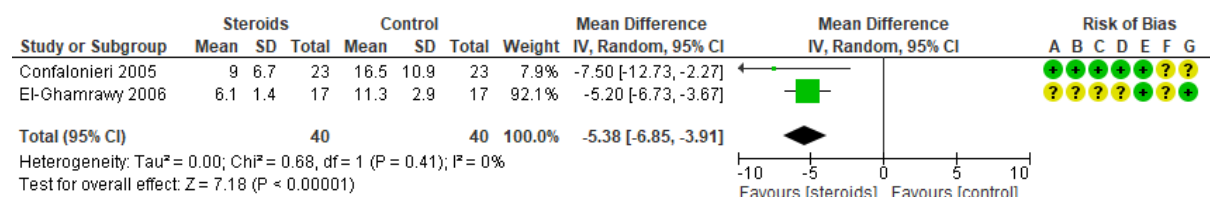

Confalonieri 2005: results reported in medians (range), estimation of means was calculated as proposed by Wan et al. 2014 (scenario 1)

## Number of patients on mechanical ventilation

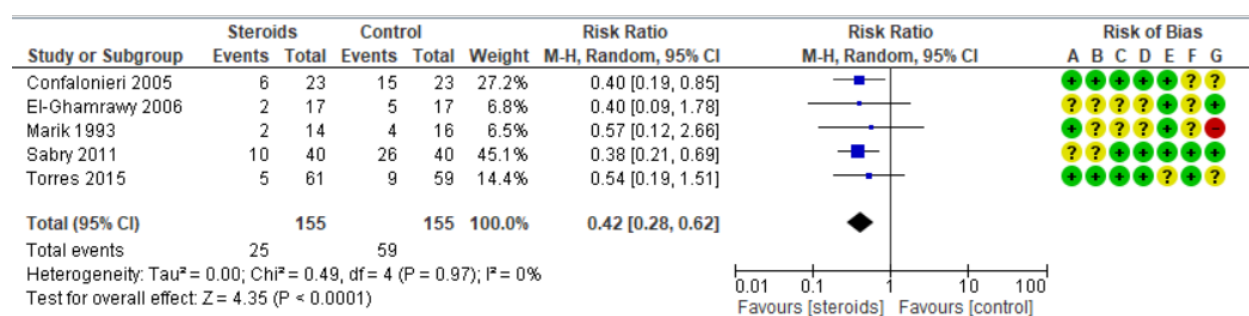

## ICU stay (days)

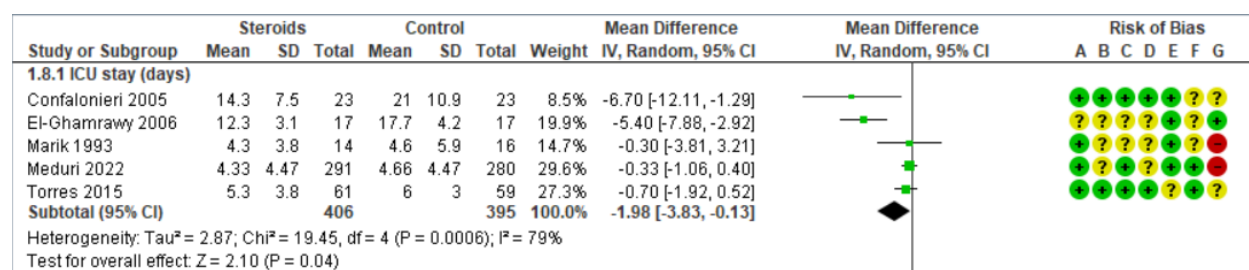

Confalonieri 2005: results reported in medians (range), estimation of means was calculated as proposed by Wan et al. 2014 (scenario 1).

Torres 2015: results reported in medians (IQR), estimation of means was calculated as proposed by Wan et al. 2014 (scenario 3).

## Hospital stay (days)

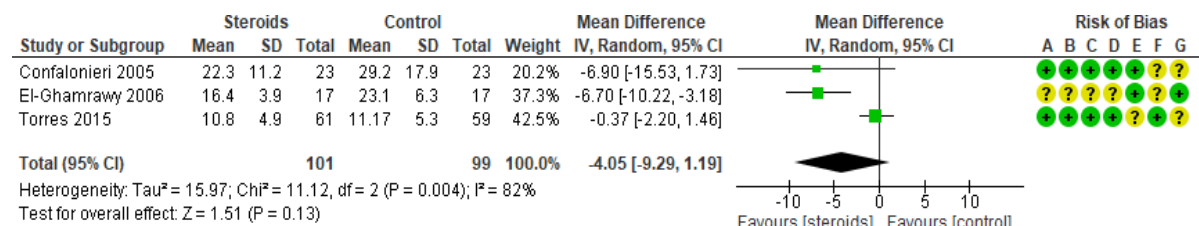

Confalonieri 2005: results reported in medians (range), estimation of means was calculated as proposed by Wan et al. 2014 (scenario 1).

Torres 2015: results reported in medians (IQR), estimation of means was calculated as proposed by Wan et al. 2014 (scenario 3).

## Gastrointestinal bleeding

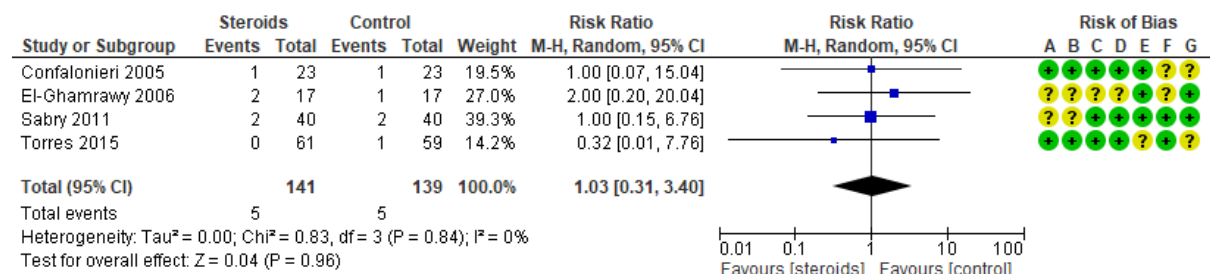

## Hyperglycemia

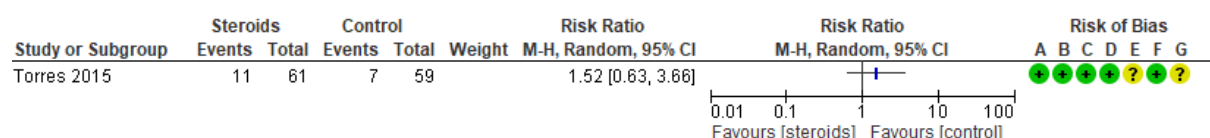

## Treatment failure

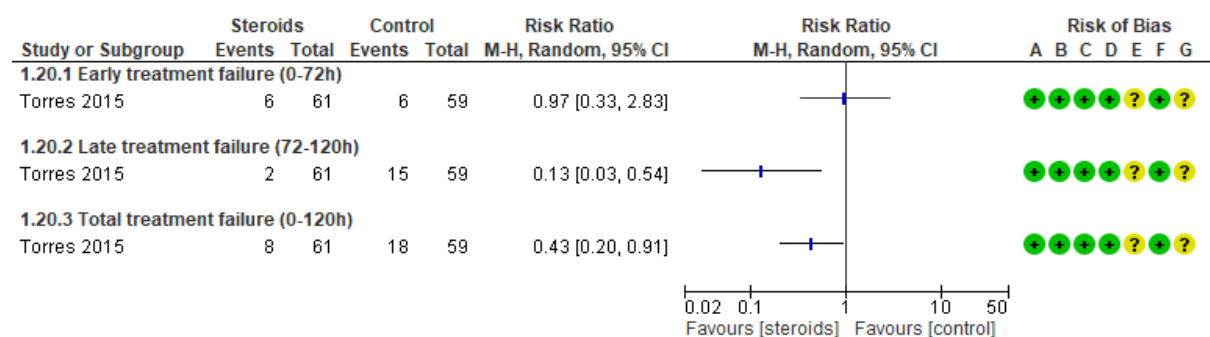

## Acute kidney failure/injury

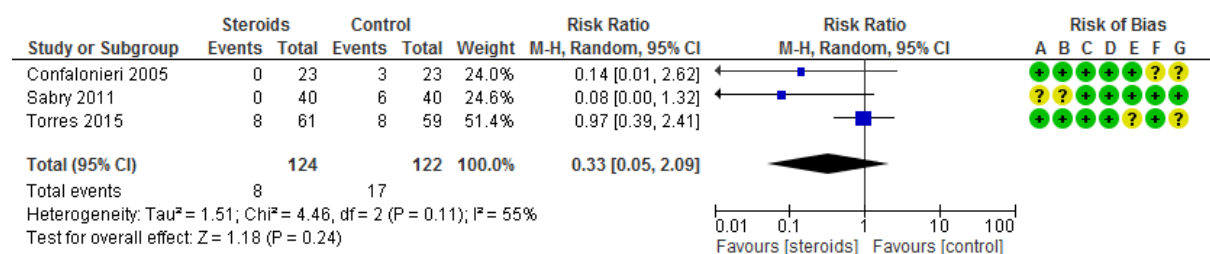

## Evidence profiles

**Study setting:** Adults with sCAP admitted for inpatient treatment in different countries (Spain, Egypt, S.Arabia, Italy, South Africa).

| Certainty assessment                                 |                      |                      |              |                      |                      | Study event rate (%) |                | Effect estimate        |                                                  | Overall certainty of evidence | Importance |
|------------------------------------------------------|----------------------|----------------------|--------------|----------------------|----------------------|----------------------|----------------|------------------------|--------------------------------------------------|-------------------------------|------------|
| No of participants (studies), follow-up              | Risk of bias         | Inconsistency        | Indirectness | Imprecision          | Other considerations | Steroids             | No steroids    | Relative (95% CI)      | Absolute (95% CI)                                |                               |            |
| Mortality - ICU mortality – dichotomous outcome      |                      |                      |              |                      |                      |                      |                |                        |                                                  |                               |            |
| 190 (4 RCTs), in ICU                                 | serious <sup>a</sup> | not serious          | not serious  | serious <sup>f</sup> | none                 | 6/94 (6.4%)          | 22/96 (22.9%)  | RR 0.36 (0.16 to 0.82) | 147 fewer per 1.000 (from 192 fewer to 41 fewer) | ⊕⊕○○ LOW                      | CRITICAL   |
| Mortality - Hospital mortality – dichotomous outcome |                      |                      |              |                      |                      |                      |                |                        |                                                  |                               |            |
| 692 (2 RCT), in hospital                             | not serious          | not serious          | not serious  | serious <sup>c</sup> | none                 | 40/352 (11.4%)       | 37/340 (10.9%) | RR 1.02 (0.62 to 1.68) | 2 more per 1.000 (from 41 fewer to 74 more)      | ⊕⊕⊕○ MODERATE                 | CRITICAL   |
| Shock (total) – dichotomous outcome                  |                      |                      |              |                      |                      |                      |                |                        |                                                  |                               |            |
| 825 (5 RCTs), in hospital                            | serious <sup>a</sup> | serious <sup>d</sup> | not serious  | not serious          | none                 | 18/415 (4.3%)        | 56/410 (13.7%) | RR 0.23 (0.06 to 0.82) | 105 fewer per 1.000 (from 128 fewer to 25 fewer) | ⊕⊕○○ LOW                      | CRITICAL   |
| Septic Shock – dichotomous outcome                   |                      |                      |              |                      |                      |                      |                |                        |                                                  |                               |            |
| 280 (4 RCTs), in hospital                            | serious <sup>a</sup> | not serious          | not serious  | serious <sup>f</sup> | none                 | 4/141 (2.8%)         | 36/139 (25.9%) | RR 0.15 (0.06 to 0.38) | 220 fewer per 1.000 (from 243                    | ⊕⊕○○ LOW                      | CRITICAL   |



|                                                                           |                      |                      |             |                      |      |                |                |                        |                                                   |          |          |
|---------------------------------------------------------------------------|----------------------|----------------------|-------------|----------------------|------|----------------|----------------|------------------------|---------------------------------------------------|----------|----------|
|                                                                           |                      |                      |             |                      |      |                |                |                        | fewer to 161 fewer)                               |          |          |
| <b>Acute respiratory distress syndrome – dichotomous outcome</b>          |                      |                      |             |                      |      |                |                |                        |                                                   |          |          |
| 666 (4 RCTS), in hospital                                                 | serious <sup>a</sup> | not serious          | not serious | serious <sup>c</sup> | none | 12/345 (3.5%)  | 20/321 (6.2%)  | RR 0.50 (0.18 to 1.43) | 31 fewer per 1.000 (from 51 fewer to 27 more)     | ⊕⊕○○ LOW | CRITICAL |
| <b>Mechanical ventilation (free days by day 8) – continuous outcome</b>   |                      |                      |             |                      |      |                |                |                        |                                                   |          |          |
| 710 (3 RCTs), up to day 8                                                 | Not serious          | serious <sup>d</sup> | not serious | serious <sup>c</sup> | none | 360            | 350            | -                      | MD 1.58 higher (0.25 lower to 2.91 higher)        | ⊕⊕○○ LOW | CRITICAL |
| <b>Duration of mechanical ventilation (days) – continuous outcome</b>     |                      |                      |             |                      |      |                |                |                        |                                                   |          |          |
| 80 (2 RCTs), in ICU                                                       | serious <sup>a</sup> | not serious          | not serious | serious <sup>f</sup> | none | 40             | 40             | -                      | MD 5.38 lower (6.85 lower to 3.91 lower)          | ⊕⊕○○ LOW | CRITICAL |
| <b>Number of patients on mechanical ventilation – dichotomous outcome</b> |                      |                      |             |                      |      |                |                |                        |                                                   |          |          |
| 310 (5 RCTs), in ICU                                                      | serious <sup>a</sup> | not serious          | not serious | serious <sup>f</sup> | none | 25/155 (16.1%) | 59/155 (38.1%) | RR 0.42 (0.28 to 0.62) | 221 fewer per 1.000 (from 274 fewer to 145 fewer) | ⊕⊕○○ LOW | CRITICAL |
| <b>ICU stay (days) – continuous outcome</b>                               |                      |                      |             |                      |      |                |                |                        |                                                   |          |          |
| 801 (5 RCTs), in ICU                                                      | serious <sup>a</sup> | serious <sup>d</sup> | not serious | not serious          | none | 406            | 395            | -                      | MD 1.98 lower (3.83 lower to 0.13 lower)          | ⊕⊕○○ LOW | CRITICAL |

|                                                        |                      |                      |             |                           |      |                  |                  |                                  |                                                             |                  |               |
|--------------------------------------------------------|----------------------|----------------------|-------------|---------------------------|------|------------------|------------------|----------------------------------|-------------------------------------------------------------|------------------|---------------|
| <b>Hospital stay (days) – continuous outcome</b>       |                      |                      |             |                           |      |                  |                  |                                  |                                                             |                  |               |
| 200 (3 RCTs), in hospital                              | serious <sup>a</sup> | serious <sup>d</sup> | not serious | serious <sup>c</sup>      | none | 101              | 99               | -                                | MD <b>4.05 lower</b><br>(9.29 lower to 1.19 higher)         | ⊕○○○<br>VERY LOW | IMPORTA<br>NT |
| <b>Gastrointestinal bleeding – dichotomous outcome</b> |                      |                      |             |                           |      |                  |                  |                                  |                                                             |                  |               |
| 280 (4 RCTs), in hospital                              | serious <sup>a</sup> | not serious          | not serious | very serious <sup>e</sup> | none | 5/141<br>(3.5%)  | 5/139<br>(3.6%)  | RR <b>1.03</b><br>(0.31 to 3.40) | <b>1 more per 1.000</b><br>(from 25 fewer to 86 more)       | ⊕○○○<br>VERY LOW | IMPORTA<br>NT |
| <b>Hyperglycemia – dichotomous outcome</b>             |                      |                      |             |                           |      |                  |                  |                                  |                                                             |                  |               |
| 120 (1 RCT), in hospital                               | not serious          | not serious          | not serious | very serious <sup>e</sup> | none | 11/61<br>(18.0%) | 7/59<br>(11.9%)  | RR <b>1.52</b><br>(0.63 to 3.66) | <b>62 more per 1.000</b><br>(from 44 fewer to 316 more)     | ⊕⊕○○<br>LOW      | IMPORTA<br>NT |
| <b>Early treatment failure – dichotomous outcome</b>   |                      |                      |             |                           |      |                  |                  |                                  |                                                             |                  |               |
| 120 (1 RCT), 0-72h                                     | not serious          | not serious          | not serious | very serious <sup>e</sup> | none | 6/61<br>(9.8%)   | 6/59<br>(10.2%)  | RR <b>0.97</b><br>(0.33 to 2.83) | <b>3 fewer per 1.000</b><br>(from 68 fewer to 186 more)     | ⊕⊕○○<br>LOW      | IMPORTA<br>NT |
| <b>Late treatment failure – dichotomous outcome</b>    |                      |                      |             |                           |      |                  |                  |                                  |                                                             |                  |               |
| 120 (1 RCT), 72-120h                                   | not serious          | not serious          | not serious | serious <sup>f</sup>      | none | 2/61<br>(3.3%)   | 15/59<br>(25.4%) | RR <b>0.13</b><br>(0.03 to 0.54) | <b>221 fewer per 1.000</b><br>(from 247 fewer to 117 fewer) | ⊕⊕⊕○<br>MODERATE | IMPORTA<br>NT |
| <b>Total treatment failure – dichotomous outcome</b>   |                      |                      |             |                           |      |                  |                  |                                  |                                                             |                  |               |

|                                    |             |                      |             |                           |      |                 |                   |                           |                                                     |                  |               |
|------------------------------------|-------------|----------------------|-------------|---------------------------|------|-----------------|-------------------|---------------------------|-----------------------------------------------------|------------------|---------------|
| 120 (1 RCT), 0-120h                | not serious | not serious          | not serious | serious <sup>f</sup>      | none | 8/61<br>(13.1%) | 18/59<br>(30.5%)  | RR 0.43<br>(0.20 to 0.91) | 174 fewer per 1.000<br>(from 244 fewer to 27 fewer) | ⊕⊕⊕○<br>MODERATE | CRITICAL      |
| <b>Acute kidney failure/injury</b> |             |                      |             |                           |      |                 |                   |                           |                                                     |                  |               |
| 246 (3 RCT), in hospital           | not serious | serious <sup>d</sup> | not serious | very serious <sup>e</sup> | none | 8/124<br>(6.5%) | 17/122<br>(13.9%) | RR 0.33<br>(0.05 to 2.09) | 93 fewer per 1.000<br>(from 132 fewer to 152 more)  | ⊕○○○<br>VERY LOW | IMPORTA<br>NT |

CI: confidence interval; ICU: intensive care unit; RCT: Randomised controlled trial; RR: risk ratio; MD: mean difference; h:hour

**Explanations for the certainty of evidence:**

**a. Concerns about risk of bias: downgraded by 1 level** due to an unclear risk of bias of selection bias and/or uncertainties regarding blinding in all or most of the included studies

**c. Concerns about imprecision: downgraded by 1 level** due to the 95% CI being consistent with the possibility for benefit or harm.

**d. Concerns about unexplained inconsistency: downgraded by 1 level** due to high I<sup>2</sup> and variances of point estimates and their CIs across some studies.

**e. Concerns about imprecision: downgraded by 2 levels** due to the low number of participants and due to the 95% CI being consistent with the possibility for benefit and the possibility of harm (dichotomous outcome) or the possibility of improving and the possibility of worsening symptoms (continuous outcome).<sup>17</sup>

**f. Concerns about imprecision: downgraded by 1 level** due to the low number of participants.

## Literature

1. Torres A, Sibila O, Ferrer M, et al. Effect of corticosteroids on treatment failure among hospitalized patients with severe community-acquired pneumonia and high inflammatory response: a randomized clinical trial. *Jama*. 2015;313(7):677-686.
2. Sabry NA, Omar EE-D. Corticosteroids and ICU course of community acquired pneumonia in Egyptian settings. *Pharmacology & Pharmacy*. 2011;2(02):73.
3. El-Ghamrawy A, Shokeir M, Esmat A. Effects of low-dose hydrocortisone in ICU patients with severe community-acquired pneumonia. *Egyptian Journal of Chest*. 2006;55:91-99.

4. Confalonieri M, Urbino R, Potena A, et al. Hydrocortisone infusion for severe community-acquired pneumonia: a preliminary randomized study. *American journal of respiratory and critical care medicine*. 2005;171(3):242-248.
5. Marik P, Kraus P, Sribante J, Havlik I, Lipman J, Johnson DW. Hydrocortisone and tumor necrosis factor in severe community-acquired pneumonia: a randomized controlled study. *Chest*. 1993;104(2):389-392.
6. Meduri GU, Shih MC, Bridges L, Martin TJ, El-Solh A, Seam N, Davis-Karim A, Umberger R, Anzueto A, Sriram P, Lan C, Restrepo MI, Guardiola JJ, Buck T, Johnson DP, Suffredini A, Bell WA, Lin J, Zhao L, Uyeda L, Nielsen L, Huang GD; ESCAPe Study Group. Low-dose methylprednisolone treatment in critically ill patients with severe community-acquired pneumonia. *Intensive Care Med*. 2022 May 13:1–15.

## Evidence to Decision (EtD) Frameworks

### Question 6. Does the addition of steroids to antibiotic therapy in specific sCAP populations lead to better outcomes in comparison to when steroid therapy is not used?

|                      |                                                                             |
|----------------------|-----------------------------------------------------------------------------|
| <b>POPULATION:</b>   | Patients with severe community acquired pneumonia (as defined in the study) |
| <b>INTERVENTION:</b> | Corticosteroids as adjunct treatment (any type, dose or route)              |
| <b>COMPARISON:</b>   | Placebo or control (no adjunctive steroids)                                 |

## ASSESSMENT

| Desirable Effects                                                                                                                                                                                            |                                                                                                                                                                    |                                                                                                                                                                                                                                                                                                                                                                                                                                                                                                                                                                                                               |
|--------------------------------------------------------------------------------------------------------------------------------------------------------------------------------------------------------------|--------------------------------------------------------------------------------------------------------------------------------------------------------------------|---------------------------------------------------------------------------------------------------------------------------------------------------------------------------------------------------------------------------------------------------------------------------------------------------------------------------------------------------------------------------------------------------------------------------------------------------------------------------------------------------------------------------------------------------------------------------------------------------------------|
| How substantial are the desirable anticipated effects?                                                                                                                                                       |                                                                                                                                                                    |                                                                                                                                                                                                                                                                                                                                                                                                                                                                                                                                                                                                               |
| JUDGEMENT                                                                                                                                                                                                    | RESEARCH EVIDENCE                                                                                                                                                  | ADDITIONAL CONSIDERATIONS                                                                                                                                                                                                                                                                                                                                                                                                                                                                                                                                                                                     |
| <input type="radio"/> Trivial<br><input type="radio"/> Small<br><input type="radio"/> Moderate<br><input checked="" type="radio"/> Large<br><input type="radio"/> Varies<br><input type="radio"/> Don't know | Pooling together all the RCT's performed in severe community-acquired pneumonia corticosteroids decreased ICU mortality                                            | <p>One large RCT (NCT01283009) on 586 patients with Severe CAP (IDSA/ATS criteria) has been completed but results are not yet available. It is a double-blind placebo-controlled study with methylprednisolone for 20 days. Primary outcome is all cause mortality at 60 days.</p> <p>Large positive effect : ICU mortality, shock, septic shock</p> <p>Based on common exclusion criteria from clinical trials, remarks should include that this recommendation does not apply to patients with viral pneumonia (Influenza, MeRS), uncontrolled diabetes and receiving corticosteroids for other reasons</p> |
| Undesirable Effects                                                                                                                                                                                          |                                                                                                                                                                    |                                                                                                                                                                                                                                                                                                                                                                                                                                                                                                                                                                                                               |
| How substantial are the undesirable anticipated effects?                                                                                                                                                     |                                                                                                                                                                    |                                                                                                                                                                                                                                                                                                                                                                                                                                                                                                                                                                                                               |
| JUDGEMENT                                                                                                                                                                                                    | RESEARCH EVIDENCE                                                                                                                                                  | ADDITIONAL CONSIDERATIONS                                                                                                                                                                                                                                                                                                                                                                                                                                                                                                                                                                                     |
| <input type="radio"/> Large<br><input type="radio"/> Moderate<br><input type="radio"/> Small<br><input checked="" type="radio"/> Trivial<br><input type="radio"/> Varies<br><input type="radio"/> Don't know | Short term adverse events / toxicity of steroids is trivial. Transient and clinically insignificant hyperglycaemia as the only evidence side-effect in short term. |                                                                                                                                                                                                                                                                                                                                                                                                                                                                                                                                                                                                               |
| Certainty of evidence                                                                                                                                                                                        |                                                                                                                                                                    |                                                                                                                                                                                                                                                                                                                                                                                                                                                                                                                                                                                                               |

| What is the overall certainty of the evidence of effects?                                                                                             |                                                                                                                                                                                                                                                                                                                                         |                           |
|-------------------------------------------------------------------------------------------------------------------------------------------------------|-----------------------------------------------------------------------------------------------------------------------------------------------------------------------------------------------------------------------------------------------------------------------------------------------------------------------------------------|---------------------------|
| JUDGEMENT                                                                                                                                             | RESEARCH EVIDENCE                                                                                                                                                                                                                                                                                                                       | ADDITIONAL CONSIDERATIONS |
| <ul style="list-style-type: none"> <li>○ Very low</li> <li>○ <b>Low</b></li> <li>○ Moderate</li> <li>○ High</li> <li>○ No included studies</li> </ul> | <p>Low quality of evidence due to imprecision in most outcomes. Although the effect is large is not robust and removing studies with no-events the effect estimate becomes non-significant.</p> <p>Low to very low quality of evidence for adverse events however adverse events of steroids are well known from other populations.</p> |                           |

  

| Values                                                                                                                                                                                                                                                                  |                                                  |                                                                                                                                                                                                                                             |
|-------------------------------------------------------------------------------------------------------------------------------------------------------------------------------------------------------------------------------------------------------------------------|--------------------------------------------------|---------------------------------------------------------------------------------------------------------------------------------------------------------------------------------------------------------------------------------------------|
| Is there important uncertainty about or variability in how much people value the main outcomes?                                                                                                                                                                         |                                                  |                                                                                                                                                                                                                                             |
| JUDGEMENT                                                                                                                                                                                                                                                               | RESEARCH EVIDENCE                                | ADDITIONAL CONSIDERATIONS                                                                                                                                                                                                                   |
| <ul style="list-style-type: none"> <li>○ Important uncertainty or variability</li> <li>○ Possibly important uncertainty or variability</li> <li>○ <b>Probably no important uncertainty or variability</b></li> <li>○ No important uncertainty or variability</li> </ul> | Not systematically reviewed as a part of this TF | <p>There has been small variability on how the panel rated critical outcomes.</p> <p>The guideline panel agreed by consensus that there is probably no important uncertainty or variability in how much people value the main outcomes.</p> |

  

| Balance of effects                                                                                                                                                                                                                                                                                                    |                                                                                                                                                                                                                                                         |                           |
|-----------------------------------------------------------------------------------------------------------------------------------------------------------------------------------------------------------------------------------------------------------------------------------------------------------------------|---------------------------------------------------------------------------------------------------------------------------------------------------------------------------------------------------------------------------------------------------------|---------------------------|
| Does the balance between desirable and undesirable effects favor the intervention or the comparison?                                                                                                                                                                                                                  |                                                                                                                                                                                                                                                         |                           |
| JUDGEMENT                                                                                                                                                                                                                                                                                                             | RESEARCH EVIDENCE                                                                                                                                                                                                                                       | ADDITIONAL CONSIDERATIONS |
| <ul style="list-style-type: none"> <li>○ Favors the comparison</li> <li>○ Probably favors the comparison</li> <li>○ Does not favor either the intervention or the comparison</li> <li>○ <b>Probably favors the intervention</b></li> <li>○ Favors the intervention</li> <li>○ Varies</li> <li>○ Don't know</li> </ul> | Corticosteroids led to a significant reduction in mortality, shock, septic shock, duration of mechanical ventilation, number of patients on mechanical ventilation, and frequency of late treatment failure. However, the certainty of evidence is low. |                           |

  

| Resources required                               |                   |                           |
|--------------------------------------------------|-------------------|---------------------------|
| How large are the resource requirements (costs)? |                   |                           |
| JUDGEMENT                                        | RESEARCH EVIDENCE | ADDITIONAL CONSIDERATIONS |
|                                                  |                   |                           |

|                                                                                                                                                                                                                                       |                                                  |                                                                                                                                                                                      |
|---------------------------------------------------------------------------------------------------------------------------------------------------------------------------------------------------------------------------------------|--------------------------------------------------|--------------------------------------------------------------------------------------------------------------------------------------------------------------------------------------|
| <ul style="list-style-type: none"> <li>○ Large costs</li> <li>○ Moderate costs</li> <li>○ Negligible costs and savings</li> <li>○ <b>Moderate savings</b></li> <li>○ Large savings</li> <li>○ Varies</li> <li>○ Don't know</li> </ul> | Not systematically reviewed as a part of this TF | Steroids are not expensive intervention. According to the cost-effectiveness study (Pilakos 2019), the intervention would be associated to some savings according to deaths averted. |
|---------------------------------------------------------------------------------------------------------------------------------------------------------------------------------------------------------------------------------------|--------------------------------------------------|--------------------------------------------------------------------------------------------------------------------------------------------------------------------------------------|

## Cost effectiveness

Does the cost-effectiveness of the intervention favor the intervention or the comparison?

| JUDGEMENT                                                                                                                                                                                                                                                                                                                      | RESEARCH EVIDENCE                                                                                                                                                                                                                                                                                                                                                                                                                                                                                                                                                                                                                                                                       | ADDITIONAL CONSIDERATIONS                                                                                                                                                                                                                                                                            |
|--------------------------------------------------------------------------------------------------------------------------------------------------------------------------------------------------------------------------------------------------------------------------------------------------------------------------------|-----------------------------------------------------------------------------------------------------------------------------------------------------------------------------------------------------------------------------------------------------------------------------------------------------------------------------------------------------------------------------------------------------------------------------------------------------------------------------------------------------------------------------------------------------------------------------------------------------------------------------------------------------------------------------------------|------------------------------------------------------------------------------------------------------------------------------------------------------------------------------------------------------------------------------------------------------------------------------------------------------|
| <ul style="list-style-type: none"> <li>○ Favors the comparison</li> <li>○ Probably favors the comparison</li> <li>○ Does not favor either the intervention or the comparison</li> <li>○ <b>Probably favors the intervention</b></li> <li>○ Favors the intervention</li> <li>○ Varies</li> <li>○ No included studies</li> </ul> | <p>Not systematically reviewed as a part of this TF</p> <p>A recent cost-effectiveness study (Pliakos, Chest 2019) constructed a decision-analytic model comparing the use of corticosteroids (plus antibiotics) with that of placebo (plus antibiotics) for the treatment of community-acquired pneumonia.</p> <p>Costs and outcomes were calculated for a time horizon of 2 months and taking the societal perspective. Costs are reported in USD 2018.</p> <p>The study found that the <b>corticosteroid strategy resulted in savings of \$70,587 per death averted in severe CAP</b>, whereas it resulted in additional costs of \$483,016 per death averted in non-severe CAP.</p> | <p>Guideline panel agreed on the low costs of steroids.</p> <p>Cost effectiveness study was based on a large reduction of mortality associated to steroid treatment however the quality of this evidence is low (and would probably change after the publication of a new large clinical trial).</p> |

## Equity

What would be the impact on health equity?

| JUDGEMENT                                                                                                                                                                                                               | RESEARCH EVIDENCE                                | ADDITIONAL CONSIDERATIONS                                                           |
|-------------------------------------------------------------------------------------------------------------------------------------------------------------------------------------------------------------------------|--------------------------------------------------|-------------------------------------------------------------------------------------|
| <ul style="list-style-type: none"> <li>○ Reduced</li> <li>○ Probably reduced</li> <li>○ <b>Probably no impact</b></li> <li>○ Probably increased</li> <li>○ Increased</li> <li>○ Varies</li> <li>○ Don't know</li> </ul> | Not systematically reviewed as a part of this TF | The guideline panel agreed by consensus that there is probably no impact on equity. |

## Acceptability

Is the intervention acceptable to key stakeholders?

| JUDGEMENT | RESEARCH EVIDENCE | ADDITIONAL CONSIDERATIONS |
|-----------|-------------------|---------------------------|
|-----------|-------------------|---------------------------|

|                                                                                                                                                                                                                        |                                                  |                                                                                                                                                                                                                             |
|------------------------------------------------------------------------------------------------------------------------------------------------------------------------------------------------------------------------|--------------------------------------------------|-----------------------------------------------------------------------------------------------------------------------------------------------------------------------------------------------------------------------------|
| <input type="radio"/> No<br><input type="radio"/> Probably no<br><input checked="" type="radio"/> <b>Probably yes</b><br><input type="radio"/> Yes<br><input type="radio"/> Varies<br><input type="radio"/> Don't know | Not systematically reviewed as a part of this TF | Uncertainties around how to identify those patients likely to benefit most from steroids, treatment duration and doses and uncertainties around steroids true effect (low quality of evidence) may limit the acceptability. |
| <b>Feasibility</b><br>Is the intervention feasible to implement?                                                                                                                                                       |                                                  |                                                                                                                                                                                                                             |
| <b>JUDGEMENT</b>                                                                                                                                                                                                       | <b>RESEARCH EVIDENCE</b>                         | <b>ADDITIONAL CONSIDERATIONS</b>                                                                                                                                                                                            |
| <input type="radio"/> No<br><input type="radio"/> Probably no<br><input type="radio"/> Probably yes<br><input checked="" type="radio"/> <b>Yes</b><br><input type="radio"/> Varies<br><input type="radio"/> Don't know | Not systematically reviewed as a part of this TF | Steroids are broadly accessible.                                                                                                                                                                                            |

## TYPE OF RECOMMENDATION

|                                                |                                                     |                                                                          |                                                        |                                            |
|------------------------------------------------|-----------------------------------------------------|--------------------------------------------------------------------------|--------------------------------------------------------|--------------------------------------------|
| Strong recommendation against the intervention | Conditional recommendation against the intervention | Conditional recommendation for either the intervention or the comparison | <b>Conditional recommendation for the intervention</b> | Strong recommendation for the intervention |
| <input type="radio"/>                          | <input type="radio"/>                               | <input type="radio"/>                                                    | <input checked="" type="radio"/>                       | <input type="radio"/>                      |

## CONCLUSIONS

### Recommendation

*In patients with sCAP, we suggest the use of corticosteroids if shock is present (conditional recommendation, low quality of evidence).*



Question 7. Does the use of a prediction score for drug-resistant pathogens lead to more appropriate therapy and improved outcomes (mortality, treatment failure, duration of antibiotic therapy, prolonged ICU stay)?

#### PRISMA Flow Diagram

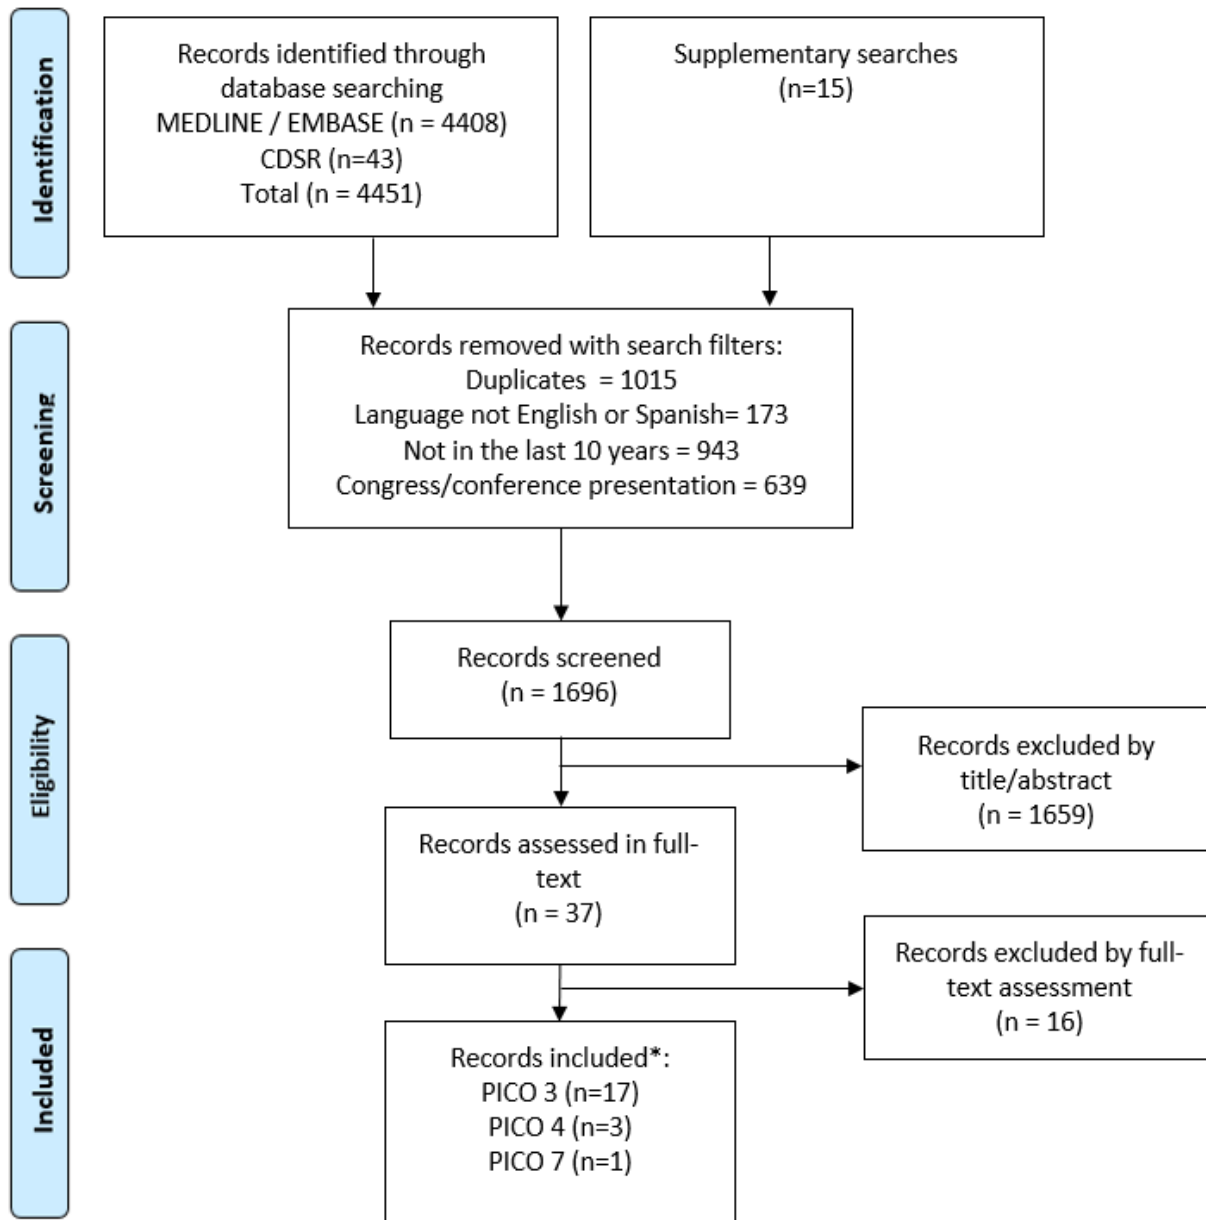

\*For PICO 3,4,7 (concerning antibiotics) one search strategy was used, results of which are presented in one PRISMA Flow Diagram

From: Moher D, Liberati A, Tetzlaff J, Altman DG, The PRISMA Group (2009). Preferred Reporting Items for Systematic Reviews and Meta-Analyses: The PRISMA Statement. PLoS Med 6(7): e1000097. doi:10.1371/journal.pmed1000097

For more information, visit [www.prisma-statement.org](http://www.prisma-statement.org).

# Summary of finding table (GRADE evidence profile) for implementation cohorts for drug-resistant pathogens in community-acquired pneumonia.

From Brito and Niedermann MDR Risk factors: Nursing Home, Hemodialysis, Recent hospitalization ≤90 days, Immunosuppression, Poor functional status, antibiotic use in ≤180 days

| Certainty assessment                             |                      |               |              |             |                      | Study event rate (%) |                 | Effect estimate        |                                                  | Overall certainty of evidence | Importance |
|--------------------------------------------------|----------------------|---------------|--------------|-------------|----------------------|----------------------|-----------------|------------------------|--------------------------------------------------|-------------------------------|------------|
| No participants (studies)                        | Risk of bias         | Inconsistency | Indirectness | Imprecision | Other considerations | 0-1 MDR factors      | ≥2 MDR factors  | Relative (95% CI)      | Absolute (95% CI)                                |                               |            |
| 30 days- Mortality                               |                      |               |              |             |                      |                      |                 |                        |                                                  |                               |            |
| 1089 prospective cohort (1)                      | serious <sup>a</sup> | not serious   | not serious  | not serious | none                 | 34/752 (4.5%)        | 42/337 (12.5%)  | OR 0.33 (0.21 to 0.53) | 80 fewer per 1.000 (from 96 fewer to 54 fewer)   | ⊕⊕⊕○ MODERATE                 | CRITICAL   |
| Need for ICU admission or mechanical ventilation |                      |               |              |             |                      |                      |                 |                        |                                                  |                               |            |
| 1089 prospective cohort (1)                      | serious <sup>a</sup> | not serious   | not serious  | not serious | none                 | 32/752 (4.3%)        | 103/337 (30.6%) | OR 0.10 (0.07 to 0.15) | 263 fewer per 1.000 (from 276 fewer to 244 more) | ⊕⊕⊕○ MODERATE                 | CRITICAL   |
| Initial treatment failure                        |                      |               |              |             |                      |                      |                 |                        |                                                  |                               |            |
| 1089 prospective cohort (1)                      | serious <sup>a</sup> | not serious   | not serious  | not serious | none                 | 77/752 (10.2%)       | 57/337 (16.9%)  | OR 0.56 (0.39 to 0.81) | 67 fewer per 1.000 (from 96 fewer to 28 fewer)   | ⊕⊕⊕○ MODERATE                 | CRITICAL   |

## Explanations

Non adjusted crude results for event rates and Odds Ratios

**References:** [Implementation cohort] Maruyama T, Fujisawa T, Ishida T, Ito A, Oyamada Y, Fujimoto K, Yoshida M, Maeda H, Miyashita N, Nagai H, Imamura Y, Shime N, Suzuki S, Amishima M, Higa F, Kobayashi H, Suga S, Tsutsui K, Kohno S, Brito V, Niederman MS. A Therapeutic Strategy for All Pneumonia Patients: A 3-Year Prospective Multicenter Cohort Study Using Risk Factors for Multidrug-resistant Pathogens to Select Initial Empiric Therapy. Clin Infect Dis. 2019 Mar 19;68(7):1080-1088.

## Summary of finding table (GRADE evidence profile) for implementation cohorts for drug-resistant pathogens in community-acquired pneumonia.

From Webb DRIP score: Major factors: Antibiotic use ≤60 days, Nursing home, Enteral feeding, Prior DRP infection ≤1 year; Minor factors: Hospitalization ≤60 days, chronic lung disease, poor functional status, gastric acid suppression, wound care, MRSA colonization ≤1 year

| Certainty assessment             |              |               |              |                      |                      | Study event rate (%)   |                        | Effect estimate        | Overall certainty of evidence | Importance |
|----------------------------------|--------------|---------------|--------------|----------------------|----------------------|------------------------|------------------------|------------------------|-------------------------------|------------|
| No participants of (studies)     | Risk of bias | Inconsistency | Indirectness | Imprecision          | Other considerations | Use of ePNa-DRIP score | Use of ePNa-HCAP score | Relative (95% CI)      |                               |            |
| Use of broad-spectrum antibiotic |              |               |              |                      |                      |                        |                        |                        |                               |            |
| 2169 (prospective cohort)        | not serious  | not serious   | not serious  | serious <sup>a</sup> | none                 | NA                     | NA                     | OR 0.62 (0.39 to 0.98) | ⊕⊕⊕○<br>MODERATE              | CRITICAL   |
| Mortality                        |              |               |              |                      |                      |                        |                        |                        |                               |            |
| 2169 (prospective cohort)        | not serious  | not serious   | not serious  | Serious <sup>b</sup> | none                 | NA                     | NA                     | OR 0.84 (0.43 to 1.6)  | ⊕⊕⊕○<br>MODERATE              | CRITICAL   |
| Length of stay                   |              |               |              |                      |                      |                        |                        |                        |                               |            |
| 2169 (prospective cohort)        | not serious  | not serious   | not serious  | Serious <sup>b</sup> | none                 | NA                     | NA                     | OR 0.98 (0.82 to 1.2)  | ⊕⊕⊕○<br>MODERATE              | IMPORTANT  |

## Explanations

Wide 95%CI that includes large effect and a potential irrelevant effect

Wide 95%CI that includes large beneficial effect and a potential harm

## **References**

[Implementation cohort] Webb BJ, Sorensen J, Mecham I, et al. Antibiotic use and outcomes after implementation of the drug resistance in pneumonia score in ED patients with community-onset pneumonia. *Chest* 2019; 156:843–851.

### Summary of finding table (GRADE evidence profile) for prediction scores for drug-resistant pathogens in community-acquired pneumonia

| Certainty assessment                                                                                                                                                     |                      |               |              |                      |                      | Effect estimate                                                                                                                                                                                                            |                     |                                        | Overall certainty of evidence |
|--------------------------------------------------------------------------------------------------------------------------------------------------------------------------|----------------------|---------------|--------------|----------------------|----------------------|----------------------------------------------------------------------------------------------------------------------------------------------------------------------------------------------------------------------------|---------------------|----------------------------------------|-------------------------------|
| No participants of (studies)                                                                                                                                             | Risk bias of         | Inconsistency | Indirectness | Imprecision          | Other considerations | Sensitivity (range)                                                                                                                                                                                                        | Specificity (range) | PPV and NPV (range)                    |                               |
| Risk factors: Recent Hospitalization, Nursing home resident, Hemodialysis , Critical illness                                                                             |                      |               |              |                      |                      | Definition of drug-resistant pathogens in community-acquired pneumonia:<br>MRSA, P. aeruginosa, ESBL Klebsiella species, nonfermenting gram                                                                                |                     |                                        |                               |
| 5671 (6 cohort studies) <sup>1</sup>                                                                                                                                     | serious <sup>a</sup> | not serious   | not serious  | serious <sup>b</sup> | none                 | 0.72 to 0.886                                                                                                                                                                                                              | 0.40 to 0.69        | PPV: 0.36 to 0.63<br>NPV: 0.85 to 0.91 | ⊕⊕⊕○<br>VERY LOW              |
| Risk factors: Nursing Home, Hemodialysis, Recent hospitalization ≤90 days, Immunosuppression, Poor functional status, antibiotic use in ≤180 days                        |                      |               |              |                      |                      | Definition of drug-resistant pathogens in community-acquired pneumonia:<br>Per ATS/IDSA 2005 Pneumonia guidelines                                                                                                          |                     |                                        |                               |
| 1857 (4 cohort studies) <sup>2</sup>                                                                                                                                     | serious <sup>a</sup> | not serious   | not serious  | serious <sup>b</sup> | none                 | 0.45 to 0.939                                                                                                                                                                                                              | 0.53 to 0.86        | PPV: 0.43 to 0.49<br>NPV: 0.87 to 0.92 | ⊕⊕⊕○<br>VERY LOW              |
| Risk factors: CVA, DM, COPD, Antibiotics ≤90 days, immunosuppression, wound care, infusion therapy, Nursing home, Recent hospitalization ≤90 days, Chronic renal failure |                      |               |              |                      |                      | Definition of drug-resistant pathogens in community-acquired pneumonia:<br>MRSA; P. aeruginosa; S. maltophilia; Vanc-resistant Enterococcus; Acinetobacter Baumanii; ESBL Enterobacter; other nonfermentating gran-bacilli |                     |                                        |                               |

| Certainty assessment                                                                                                                                                                                  |                      |               |              |                      |                      | Effect estimate                                                                                                                                                                                                                                                                                                                     |                     |                                       | Overall certainty of evidence |
|-------------------------------------------------------------------------------------------------------------------------------------------------------------------------------------------------------|----------------------|---------------|--------------|----------------------|----------------------|-------------------------------------------------------------------------------------------------------------------------------------------------------------------------------------------------------------------------------------------------------------------------------------------------------------------------------------|---------------------|---------------------------------------|-------------------------------|
| No participants of (studies)                                                                                                                                                                          | Risk bias of         | Inconsistency | Indirectness | Imprecision          | Other considerations | Sensitivity (range)                                                                                                                                                                                                                                                                                                                 | Specificity (range) | PPV and NPV (range)                   |                               |
| 5387 (6 cohort studies) <sup>3</sup>                                                                                                                                                                  | serious <sup>a</sup> | not serious   | not serious  | serious <sup>b</sup> | none                 | 0.71 to 0.88                                                                                                                                                                                                                                                                                                                        | 0.47 to 0.71        | PPV: 0.33 to 0.49<br>NPV: 0.9 to 0.92 | ⊕⊕⊕○<br>VERY LOW              |
| <b>Risk factors:</b> Recent hospitalization, Immunosuppression, Antibiotics ≤90 days, Gastric acid suppression, Enteral feed, Nonambulatory status. <b>MRSA Risk Factors:</b> Hemodialysis CHF + MRSA |                      |               |              |                      |                      | <b>Definition of drug-resistant pathogens in community-acquired pneumonia:</b><br><br>MDR: nonsusceptible to at least one agent in ≥3 microbial categories<br>XDR (extensively drug-resistant): nonsusceptible to ≥1 agent in all but ≤2 antimicrobial categories<br>PDR (pandrug-resistant): resistant to all antimicrobial agents |                     |                                       |                               |
| 2949 (4 cohort studies) <sup>4</sup>                                                                                                                                                                  | serious <sup>a</sup> | not serious   | not serious  | serious <sup>b</sup> | none                 | 0.45 to 0.84                                                                                                                                                                                                                                                                                                                        | 0.60 to 0.909       | PPV: 0.26 to 0.5<br>NPV: 0.87 to 0.91 | ⊕⊕⊕○<br>VERY LOW              |
| <b>Risk factors:</b> Age <30 or >79, Recent hospitalization, Nursing home ≤90 days, Prior IV Antibiotics ≤30 days, ICU admission, CVA, Dementia, Female, Diabetes                                     |                      |               |              |                      |                      | <b>Definition of drug-resistant pathogens in community-acquired pneumonia:</b><br><br>MRSA                                                                                                                                                                                                                                          |                     |                                       |                               |
| 6897 (4 cohort studies) <sup>5</sup>                                                                                                                                                                  | serious <sup>a</sup> | not serious   | not serious  | serious <sup>b</sup> | none                 | 0.495 to 0.97                                                                                                                                                                                                                                                                                                                       | 0.30 to 0.641       | PPV: 0.19 to 0.23<br>NPV: 0.9 to 0.98 | ⊕⊕⊕○<br>VERY LOW              |

|                                                                                                                                                                                                                                                                                      |                      |             |             |             |             |      |                                                                                                                                                                       |              |                                       |             |
|--------------------------------------------------------------------------------------------------------------------------------------------------------------------------------------------------------------------------------------------------------------------------------------|----------------------|-------------|-------------|-------------|-------------|------|-----------------------------------------------------------------------------------------------------------------------------------------------------------------------|--------------|---------------------------------------|-------------|
| <b>Risk factors:</b> Age, gender (male), Antibiotics, Chronic respiratory disorder, CKD, Confusion, Fever                                                                                                                                                                            |                      |             |             |             |             |      | <b>Definition of drug-resistant pathogens in community-acquired pneumonia:</b><br>P. aeruginosa, MRSA, ESBL                                                           |              |                                       |             |
| 2519 (5 cohort studies) <sup>6</sup>                                                                                                                                                                                                                                                 | serious <sup>a</sup> | not serious | not serious | not serious | not serious | none | 0.61 to 1                                                                                                                                                             | 0.71 to 0.90 | PPV: 0.13 to 0.5<br>NPV: 0.82 to 0.97 | ⊕⊕○○<br>LOW |
| <b>Risk factors:</b><br>Major factors: Antibiotic use ≤60 days, Nursing home, Enteral feeding, Prior DRP infection ≤1 year<br>Minor factors: Hospitalization ≤60 days, chronic lung disease, poor functional status, gastric acid suppression, wound care, MRSA colonization ≤1 year |                      |             |             |             |             |      | <b>Definition of drug-resistant pathogens in community-acquired pneumonia:</b><br>Any organism resistant to treatment with ceftriaxone + azithromycin or levofloxacin |              |                                       |             |
| 1633 (4 cohort studies) <sup>7</sup>                                                                                                                                                                                                                                                 | serious <sup>a</sup> | not serious | not serious | not serious | not serious | none | 0.70 to 0.82                                                                                                                                                          | 0.71 to 0.82 | PPV: 0.08 to 0.68<br>NPV: 0.9 to 0.99 | ⊕⊕○○<br>LOW |

### Explanations

Observational data includes derivation cohort and external retrospective validation cohorts

It was not possible to pool diagnostic data which is represented as a range. Relatively large range of accuracy values.

### References

1. [Derivation cohort] Shorr AF, Zilberberg MD, Micek ST, Kollef MH. Prediction of infection due to antibiotic-resistant bacteria by select risk factors for health care-associated pneumonia. Arch Intern Med. 2008 Nov 10;168(20):2205-10.
2. [Derivation cohort] Brito V, Niederman MS. Healthcare-associated pneumonia is a heterogeneous disease, and all patients do not need the same broad-spectrum antibiotic therapy as complex nosocomial pneumonia. Curr Opin Infect Dis. 2009 Jun;22(3):316-25.
3. [Derivation cohort] Aliberti S, Di Pasquale M, Zanaboni AM, Cosentini R, Brambilla AM, Seghezzi S, Tarsia P, Mantero M, Blasi F. Stratifying risk factors for multidrug-resistant pathogens in hospitalized patients coming from the community with pneumonia. Clin Infect Dis. 2012 Feb 15;54(4):470-8.
4. [Derivation cohort] Shindo Y, Ito R, Kobayashi D, Ando M, Ichikawa M, Shiraki A, Goto Y, Fukui Y, Iwaki M, Okumura J, Yamaguchi I, Yagi T, Tanikawa Y, Sugino Y, Shindoh J, Ogasawara T, Nomura F, Saka H, Yamamoto M, Taniguchi H, Suzuki R, Saito H, Kawamura T, Hasegawa Y. Risk factors for drug-resistant pathogens in community-acquired and healthcare-associated pneumonia. Am J Respir Crit Care Med. 2013 Oct 15;188(8):985-95.



5. [Derivation cohort] Shorr AF, Myers DE, Huang DB, Nathanson BH, Emons MF, Kollef MH. A risk score for identifying methicillin-resistant *Staphylococcus aureus* in patients presenting to the hospital with pneumonia. *BMC Infect Dis.* 2013 Jun 6;13:268.
6. [Derivation cohort] Prina E, Ranzani OT, Polverino E, Cillóniz C, Ferrer M, Fernandez L, Puig de la Bellacasa J, Menéndez R, Mensa J, Torres A. Risk factors associated with potentially antibiotic-resistant pathogens in community-acquired pneumonia. *Ann Am Thorac Soc.* 2015 Feb;12(2):153-60.
7. [Derivation cohort] Webb BJ, Dascomb K, Stenehjem E, Vikram HR, Agrwal N, Sakata K, Williams K, Bockorny B, Bagavathy K, Mirza S, Metersky M, Dean NC. Derivation and Multicenter Validation of the Drug Resistance in Pneumonia Clinical Prediction Score. *Antimicrob Agents Chemother.* 2016 Apr 22;60(5):2652-63.

**Supplementary Table, question 7. Evidence for prediction of drug resistant pathogens in sCAP.**

| Prediction score                          | Derivation cohort (number of patients) | Drug resistant pathogens covered by the score                                                  | Risk factors (number of points)                                                                                                                                               | Prevalence in low and high risk scores | Performance of the score                                                                                                                                                                                                                                                                                                                                                                            | Implementation study |
|-------------------------------------------|----------------------------------------|------------------------------------------------------------------------------------------------|-------------------------------------------------------------------------------------------------------------------------------------------------------------------------------|----------------------------------------|-----------------------------------------------------------------------------------------------------------------------------------------------------------------------------------------------------------------------------------------------------------------------------------------------------------------------------------------------------------------------------------------------------|----------------------|
| Niederman and Brito (2007), HCAP criteria | Japan (n=321)                          | Defined according to ATS/IDSA 2005 guidelines                                                  | Any of: Nursing Home, Hemodialysis, Recent hospitalization ≤90 days (1)<br>Any of: Immunosuppression, Poor functional status, antibiotic use in <180 days (1)                 | NA                                     | Se=0.94<br>Sp=0.55<br>AUROC=NA<br><br>Se=0.91 (0.81-0.76)<br>Sp=0.53 (0.44-0.62)<br>PPV=0.49 (0.40-0.58)<br>NPV=0.92 (0.83-0.97)<br>AUROC=0.80 (0.74-0.87)<br><br>Se=0.45 (0.33-0.57)<br>Sp=0.86 (0.81-0.90)<br>PPV=0.43 (0.32-0.55)<br>NPV=0.87 (0.82-0.90)<br>AUROC=0.78 (0.74-0.82)                                                                                                              |                      |
| Shorr (2008)                              | USA (n=639)                            | MDR pathogens : MRSA Pseudomonas aeruginosa Acinetobacter spp ESBL producing enterobacteriales | Sum 4 variables (10 points): Recent hospitalization (4) Long term care facility (3) Chronic hemodialysis (2) Admission to the ICU within 24 hours of evaluation in the ED (1) | Low risk= 17% High risk= 77%           | Cutoff≥1<br>Se=88.6%<br>Sp=54.5%<br>PPV=0.63<br>NPV=0.85<br>AUROC=0.71 (0.66-0.73)<br><br>Cutoff≥1<br>Se=0.88 (0.77-0.94)<br>Sp=0.4 (0.31-0.48)<br>PPV= 0.42 (0.34-0.50)<br>NPV= 0.87 (0.75-0.94)<br>AUROC=0.77 (0.70-0.85)<br><br>Cutoff≥1<br>Se=0.72 (0.60-0.82)<br>Sp=0.69 (0.63-0.74)<br>PPV= 0.36 (0.28-0.45)<br>NPV= 0.91 (0.87-0.95)<br>AUROC=0.73 (0.66-0.80)<br><br>AUROC=0.77 (0.58-0.96) | No                   |
| Schreiber                                 | USA (n=190)                            | MDR pathogens : MRSA Pseudomonas aeruginosa ESBL producing enterobacteriales                   | Sum 3 variables (6 points): Immunosuppression (3) Admission from long-term care (2) Prior antibiotics (1)                                                                     | Low risk= 60% High risk= 40%           | Cutoff≥2<br>Se=0.80<br>Sp=0.63<br>AUROC=0.71<br><br>Cutoff≥2<br>Se=0.71 (0.55-0.79)<br>Sp=0.66 (0.58-0.74)<br>PPV= 0.53 (0.42-0.63)<br>NPV=0.86 (0.77-0.92)<br>AUROC=0.72 (0.64-0.79)                                                                                                                                                                                                               |                      |

|                               |                |                                                                                                                                                                                                                                                                    |                                                                                                                                                                                                                                                                                                                                                                                                                     |                                  |                                                                                                                                                                                                                                                                                                                                                                                                                                       |    |
|-------------------------------|----------------|--------------------------------------------------------------------------------------------------------------------------------------------------------------------------------------------------------------------------------------------------------------------|---------------------------------------------------------------------------------------------------------------------------------------------------------------------------------------------------------------------------------------------------------------------------------------------------------------------------------------------------------------------------------------------------------------------|----------------------------------|---------------------------------------------------------------------------------------------------------------------------------------------------------------------------------------------------------------------------------------------------------------------------------------------------------------------------------------------------------------------------------------------------------------------------------------|----|
|                               |                |                                                                                                                                                                                                                                                                    |                                                                                                                                                                                                                                                                                                                                                                                                                     |                                  | Cutoff $\geq$ 2<br>Se=0.51 (0.39-0.63)<br>Sp=0.77 (0.72-0.82)<br>PPV= 0.36 (0.26-0.46)<br>NPV=0.87 (0.82-0.91)<br>AUROC=0.67 (0.60-0.74)                                                                                                                                                                                                                                                                                              |    |
| Aliberti (2012)               | Italy (n=935)  | MDR pathogens :<br>MRSA<br>Pseudomonas aeruginosa resistant to quinolones, antipseudomonal penicillins, cephalosporins, carbapenems<br>Acinetobacter spp.<br>ESBL producing enterobacteriales<br>Stenotrophomonas maltophilia<br>Vancomycin-resistant Enterococcus | Sum 6 variables (12.5 points):<br>Chronic renal failure (5)<br>Hospitalization for greater than or equal to 2 days or more in the preceding 90 days (4)<br>Residence in a nursing home (3);<br>Cerebrovascular disease (0.5)<br>Diabetes (0.5)<br>Chronic lung disease (0.5)<br>Antimicrobial therapy in preceding 90 days (0.5)<br>Immunosuppression (0.5)<br>Home wound care (0.5)<br>Home infusion therapy (0.5) | Low risk= 8%<br>High risk= 38%   | Cutoff $\geq$ 3<br>Se=0.75<br>Sp=0.71<br>AUROC=0.79 (0.71-0.87)<br><br>Cutoff $\geq$ 0.5<br>Se=0.88 (0.77-0.94)<br>Sp=0.55 (0.46-0.64)<br>PPV= 0.49 (0.40-0.58)<br>NPV= 0.90 (0.81-0.95)<br>AUROC=0.73 (0.66-0.8)<br><br>Cutoff $\geq$ 3<br>Se=NA<br>Sp=NA<br>AUROC=0.85 (0.75-0.96)<br><br>Cutoff $\geq$ 3<br>Se=0.79 (0.68-0.88)<br>Sp=0.61 (0.56-0.67)<br>PPV= 0.33 (0.26-0.41)<br>NPV= 0.92 (0.88-0.96)<br>AUROC=0.71 (0.65-0.77) | No |
| Schindo (2013), CAP-DRP rule  | Japan (n=1413) | DRP defined by resistance to $\beta$ -lactams (ceftriaxone or ampicillin-sulbactam), macrolides and fluoroquinolones<br>MRSA (47%)<br>Pseudomonas aeruginosa (24%)<br>ESBL-producing enterobacteriales (12%)                                                       | Sum of 6 variables (10 points) :<br>Prior hospitalization<br>Immunosuppression<br>Previous antibiotic use<br>Use of gastric acid-suppressive agents<br>Tube feeding<br>Non ambulatory status                                                                                                                                                                                                                        | Low risk= 6.5%<br>High risk= 63% | CAP-DRP $\geq$ 3<br>Se=0.47<br>Sp=0.91<br>PPV=0.26<br>NPV=0.91<br>AUROC= 0.79 (0.74-0.84)<br><br>CAP-DRP $\geq$ 3<br>Se=0.83 (0.72-0.91)<br>Sp=0.60 (0.51-0.68)<br>PPV= 0.5 (0.41-0.60)<br>NPV=0.88 (0.79-0.94)<br>AUROC=0.79 (0.73-0.86)<br><br>CAP-DRP $\geq$ 3<br>Se=0.45 (0.34-0.57),<br>Sp=0.87 (0.83-0.91)<br>PPV=0.47 (0.35-0.59)<br>NPV=0.87 (0.82-0.9)<br>AUROC=0.73 (0.66-0.79)                                             | No |
| Shorr (2013), MRSA risk score | USA (n=5975)   | MRSA                                                                                                                                                                                                                                                               | Sum of 8 variables (10 points):                                                                                                                                                                                                                                                                                                                                                                                     | Low risk <10%                    | Cutoff<2<br>Se=0.59<br>Sp=0.60<br>PPV=0.19                                                                                                                                                                                                                                                                                                                                                                                            | No |

|                                                        |                |                                                                                                   |                                                                                                                                                                                                                                                                                                                |                                           |                                                                                                                                                                                                                                                                                                                                                                                                                                                                                                                                                                                                                                       |    |
|--------------------------------------------------------|----------------|---------------------------------------------------------------------------------------------------|----------------------------------------------------------------------------------------------------------------------------------------------------------------------------------------------------------------------------------------------------------------------------------------------------------------|-------------------------------------------|---------------------------------------------------------------------------------------------------------------------------------------------------------------------------------------------------------------------------------------------------------------------------------------------------------------------------------------------------------------------------------------------------------------------------------------------------------------------------------------------------------------------------------------------------------------------------------------------------------------------------------------|----|
|                                                        |                |                                                                                                   | <p>age &lt; 30 or &gt; 79 years (1)</p> <p>Recent hospitalization or ICU admission (2)</p> <p>Prior nursing home/long term acute care exposure (1)</p> <p>Prior IV antibiotic therapy (1)</p> <p>ICU admission (2)</p> <p>Dementia (1)</p> <p>Cerebrovascular disease (1),</p> <p>Female with diabetes (1)</p> | High risk> 30%                            | <p>NPV=0.90</p> <p>AUROC= 0.64 (0.6-0.67)</p> <p>Cutoff<math>\geq</math>2</p> <p>Se=0.97 (0.81-1), Sp=0.3 (0.23-0.37, PPV=0.21 (0.15-0.28), NPV=0.98 (0.88-1)</p> <p>AUROC=NA</p> <p>Cutoff<math>\geq</math>2</p> <p>Se=0.84 (0.71-0.93)</p> <p>Sp=0.55 (0.49-0.61)</p> <p>PPV=0.23 (0.17-0.30)</p> <p>NPV=0.96 (0.92-0.98)</p> <p>PPV=NA</p> <p>NPV=NA</p> <p>AUROC=NA</p>                                                                                                                                                                                                                                                           |    |
| Prina (2014)                                           | Spain (n=1597) | <p>PES pathogens : Pseudomonas aeruginosa</p> <p>ESBL producing enterobacteriales</p> <p>MRSA</p> | <p>Sum of 6 variables (12 points):</p> <p>age &lt; 40 (0) or 40-65 (1) or &lt;65 years (2)</p> <p>Male (1)</p> <p>Antibiotics (2)</p> <p>Chronic respiratory disorder (2)</p> <p>Chronic kidney disease (3)</p> <p>Confusion (2)</p> <p>Fever (-1)</p>                                                         | <p>Low risk= 1%</p> <p>High risk= 70%</p> | <p>Cutoff<math>\geq</math>5</p> <p>Se=0.7, Sp=0.71, PPV=NA</p> <p>NPV=NA</p> <p>AUROC=0.75 (0.71-0.80)</p> <p>Cutoff<math>\geq</math>5</p> <p>Se=0.71 (0.59-0.81), Sp=0.65 (0.56-0.73),</p> <p>PPV= 0.5 (0.4-0.6)</p> <p>NPV= 0.82 (0.73-0.89)</p> <p>AUROC=0.74 (0.67-0.81)</p> <p>Cutoff<math>\geq</math>2</p> <p>Se=0.96 (0.89-0.99)</p> <p>Sp=0.09 (0.06-0.13)</p> <p>PPV= 0.21 (0.17-0.25)</p> <p>NPV= 0.90 (0.74-0.98)</p> <p>AUROC=0.70 (0.63-0.77)</p> <p>Cutoff &gt;4 points:</p> <p>Se=0.61 (0.44-0.78)</p> <p>Sp=0.77 (0.73-0.8)</p> <p>PPV=0.13 (0.08-0.19)</p> <p>NPV=0.97 (0.95-0.99)</p> <p>AUROC=0.78 (0.72-0.85)</p> | No |
| Webb (2016), DRIP (Drug Resistance in Pneumonia) score | USA (n=201)    | <p>DRP defined by resistance to either ceftriaxone plus azithromycin or levofloxacin.</p>         | <p>Sum 10 variables (14 points):</p> <p>Antibiotic use within previous 60 days (2)</p> <p>Residence in long-term care facility (2)</p> <p>Tube feeding (2)</p> <p>Prior infection with a drug resistant-pathogens (1 yr) (2)</p> <p>Hospitalization within previous 60 days (1)</p>                            | -                                         | <p>Cutoff<math>\geq</math>4</p> <p>Se=0.82 (0.67-0.88)</p> <p>Sp=0.81 (0.73-0.87)</p> <p>PPV=0.68 (0.56-0.78)</p> <p>NPV=0.90 (0.81-0.93)</p> <p>AUROC=0.88 (0.82-0.93)</p> <p>Cutoff<math>\geq</math>4</p> <p>Se=0.71 (0.44-0.89), Sp=0.82 (0.79-0.85),</p> <p>PPV=0.08 (0.05-0.14)</p> <p>NPV=0.99 (0.98-1)</p> <p>AUROC=0.79 (0.65-0.93)</p>                                                                                                                                                                                                                                                                                       |    |

|  |  |  |                                                                                                                                                    |  |  |  |
|--|--|--|----------------------------------------------------------------------------------------------------------------------------------------------------|--|--|--|
|  |  |  | Chronic pulmonary<br>disease (1)<br>Poor functional<br>status (1)<br>Gastric acid<br>suppression (1)<br>Wound care (1)<br>MRSA colonization<br>(1) |  |  |  |
|--|--|--|----------------------------------------------------------------------------------------------------------------------------------------------------|--|--|--|

## Evidence to Decision (EtD) Frameworks

**Question 7: Does the use of a prediction score for drug-resistant pathogens lead to more appropriate therapy and improved outcomes (mortality, treatment failure, duration of antibiotic therapy, prolonged ICU stay)?**

|                      |                                                                                       |
|----------------------|---------------------------------------------------------------------------------------|
| <b>POPULATION:</b>   | Patients with severe community acquired pneumonia (as defined in the study)           |
| <b>INTERVENTION:</b> | Use of prediction scores for drug-resistant pathogens in community-acquired pneumonia |
| <b>COMPARISON:</b>   | Standard treatment                                                                    |

## ASSESSMENT

| Desirable Effects                                                                                                                                                |                                                                                                                                                                                                                                                                                                                                                                                                                                                                                                                                                                                                                                                                  |                                                                                                                                                                                                                                                                                                              |
|------------------------------------------------------------------------------------------------------------------------------------------------------------------|------------------------------------------------------------------------------------------------------------------------------------------------------------------------------------------------------------------------------------------------------------------------------------------------------------------------------------------------------------------------------------------------------------------------------------------------------------------------------------------------------------------------------------------------------------------------------------------------------------------------------------------------------------------|--------------------------------------------------------------------------------------------------------------------------------------------------------------------------------------------------------------------------------------------------------------------------------------------------------------|
| How substantial are the desirable anticipated effects?                                                                                                           |                                                                                                                                                                                                                                                                                                                                                                                                                                                                                                                                                                                                                                                                  |                                                                                                                                                                                                                                                                                                              |
| JUDGEMENT                                                                                                                                                        | RESEARCH EVIDENCE                                                                                                                                                                                                                                                                                                                                                                                                                                                                                                                                                                                                                                                | ADDITIONAL CONSIDERATIONS                                                                                                                                                                                                                                                                                    |
| <ul style="list-style-type: none"> <li>○ Trivial</li> <li>○ Small</li> <li>○ Moderate</li> <li><b>X Large</b></li> <li>○ Varies</li> <li>○ Don't know</li> </ul> | <p>Relatively low accuracy data for most of the risk scores of MDR pathogens. Brito / Niedermann 2009, Prina 2015 and Webb 2016 performed better than others.</p> <p>But high negative predictive value for the vast majority of the scores</p> <p>Only two (Bruto / Niedermann 2009 and Webb 2016) have been implemented.</p> <p>Bruto / Niedermann 2009 shows that lower scores are associated with significant lower mortality, need for ICU admission / MV and initial treatment failure.</p> <p>Webb 2016 showed that in comparison to HCAP score DRIP score reduced the need of broad-spectrum antibiotic therapy but not mortality and length of stay</p> | <p>Use of any of these risk scores should be considered according to the local epidemiology and in addition to other clinical and diagnostic data.</p> <p>Outcome reductions observed in Brito / Niedermann 2009 for low-high scores are similar to those observed when comparing CAP vs HAP pneumonias.</p> |
| Undesirable Effects                                                                                                                                              |                                                                                                                                                                                                                                                                                                                                                                                                                                                                                                                                                                                                                                                                  |                                                                                                                                                                                                                                                                                                              |
| How substantial are the undesirable anticipated effects?                                                                                                         |                                                                                                                                                                                                                                                                                                                                                                                                                                                                                                                                                                                                                                                                  |                                                                                                                                                                                                                                                                                                              |
| JUDGEMENT                                                                                                                                                        | RESEARCH EVIDENCE                                                                                                                                                                                                                                                                                                                                                                                                                                                                                                                                                                                                                                                | ADDITIONAL CONSIDERATIONS                                                                                                                                                                                                                                                                                    |

|                                                                                                                                                                                                                                                                                                |                                                                                                               |                                                                                                                                                                                                                                                                                                        |
|------------------------------------------------------------------------------------------------------------------------------------------------------------------------------------------------------------------------------------------------------------------------------------------------|---------------------------------------------------------------------------------------------------------------|--------------------------------------------------------------------------------------------------------------------------------------------------------------------------------------------------------------------------------------------------------------------------------------------------------|
| <input type="radio"/> Large<br><input type="radio"/> Moderate<br><input checked="" type="radio"/> <b>Small</b><br><input type="radio"/> Trivial<br><input type="radio"/> Varies<br><input type="radio"/> Don't know                                                                            | Low risk of misclassification given the high negative predictive values of the scores                         |                                                                                                                                                                                                                                                                                                        |
| <b>Certainty of evidence</b><br>What is the overall certainty of the evidence of effects?                                                                                                                                                                                                      |                                                                                                               |                                                                                                                                                                                                                                                                                                        |
| <b>JUDGEMENT</b>                                                                                                                                                                                                                                                                               | <b>RESEARCH EVIDENCE</b>                                                                                      | <b>ADDITIONAL CONSIDERATIONS</b>                                                                                                                                                                                                                                                                       |
| <input type="radio"/> Very low<br><input checked="" type="radio"/> <b>Low</b><br><input checked="" type="radio"/> <b>Moderate</b><br><input type="radio"/> High<br><input type="radio"/> No included studies                                                                                   | Low to very low for accuracy data (derivation and validation cohorts)<br><br>Moderate for implementation data |                                                                                                                                                                                                                                                                                                        |
| <b>Values</b><br>Is there important uncertainty about or variability in how much people value the main outcomes?                                                                                                                                                                               |                                                                                                               |                                                                                                                                                                                                                                                                                                        |
| <b>JUDGEMENT</b>                                                                                                                                                                                                                                                                               | <b>RESEARCH EVIDENCE</b>                                                                                      | <b>ADDITIONAL CONSIDERATIONS</b>                                                                                                                                                                                                                                                                       |
| <input type="radio"/> Important uncertainty or variability<br><input checked="" type="radio"/> <b>Possibly important uncertainty or variability</b><br><input type="radio"/> Probably no important uncertainty or variability<br><input type="radio"/> No important uncertainty or variability | Not systematically reviewed as a part of this TF                                                              | There has been small variability on how the panel rated critical outcomes.<br><br>The guideline panel agreed by consensus that there is possibly important uncertainty or variability in how much people value the need of intubation but less or no uncertainty or variability for mortality outcome. |
| <b>Balance of effects</b><br>Does the balance between desirable and undesirable effects favor the intervention or the comparison?                                                                                                                                                              |                                                                                                               |                                                                                                                                                                                                                                                                                                        |
| <b>JUDGEMENT</b>                                                                                                                                                                                                                                                                               | <b>RESEARCH EVIDENCE</b>                                                                                      | <b>ADDITIONAL CONSIDERATIONS</b>                                                                                                                                                                                                                                                                       |

|                                                                                                                                                                                                                                                                                                                       |                                                                                                                                                                                                                                                                                                                                                                                                                                                                           |                                  |
|-----------------------------------------------------------------------------------------------------------------------------------------------------------------------------------------------------------------------------------------------------------------------------------------------------------------------|---------------------------------------------------------------------------------------------------------------------------------------------------------------------------------------------------------------------------------------------------------------------------------------------------------------------------------------------------------------------------------------------------------------------------------------------------------------------------|----------------------------------|
| <ul style="list-style-type: none"> <li>○ Favors the comparison</li> <li>○ Probably favors the comparison</li> <li>○ Does not favor either the intervention or the comparison</li> <li>○ Probably favors the intervention</li> <li><b>X Favors the intervention</b></li> <li>○ Varies</li> <li>○ Don't know</li> </ul> | <p>In a recent systematic review, fourteen published risk prediction methods for DRP were identified, of which eight were externally validated. They are characterised by high sensitivity and generally low specificity that may favour overtreatment. However, most of these scores have high negative predictive values (mostly more than 90%) suggesting that their use may allow broad-spectrum regimens and spare a proportion of patients with low-risk scores</p> |                                  |
| <b>Resources required</b><br>How large are the resource requirements (costs)?                                                                                                                                                                                                                                         |                                                                                                                                                                                                                                                                                                                                                                                                                                                                           |                                  |
| <b>JUDGEMENT</b>                                                                                                                                                                                                                                                                                                      | <b>RESEARCH EVIDENCE</b>                                                                                                                                                                                                                                                                                                                                                                                                                                                  | <b>ADDITIONAL CONSIDERATIONS</b> |
| <ul style="list-style-type: none"> <li>○ Large costs</li> <li>○ Moderate costs</li> <li>○ Negligible costs and savings</li> <li>○ Moderate savings</li> <li>○ Large savings</li> <li>○ Varies</li> <li>○ <b>Don't know</b></li> </ul>                                                                                 | <p>Not systematically reviewed as a part of this TF.</p>                                                                                                                                                                                                                                                                                                                                                                                                                  |                                  |
| <b>Cost effectiveness</b><br>Does the cost-effectiveness of the intervention favor the intervention or the comparison?                                                                                                                                                                                                |                                                                                                                                                                                                                                                                                                                                                                                                                                                                           |                                  |
| <b>JUDGEMENT</b>                                                                                                                                                                                                                                                                                                      | <b>RESEARCH EVIDENCE</b>                                                                                                                                                                                                                                                                                                                                                                                                                                                  | <b>ADDITIONAL CONSIDERATIONS</b> |
| <ul style="list-style-type: none"> <li>○ Favors the comparison</li> <li>○ Probably favors the comparison</li> <li>○ Does not favor either the intervention or the comparison</li> <li>○ Probably favors the intervention</li> </ul>                                                                                   | <p>Not systematically reviewed as a part of this TF.</p>                                                                                                                                                                                                                                                                                                                                                                                                                  |                                  |



|                                                                                                                                                                                                                                                                               |                                                   |                                  |
|-------------------------------------------------------------------------------------------------------------------------------------------------------------------------------------------------------------------------------------------------------------------------------|---------------------------------------------------|----------------------------------|
| <input type="radio"/> Favors the intervention<br><input type="radio"/> Varies<br><input type="radio"/> <b>No included studies</b>                                                                                                                                             |                                                   |                                  |
| <b>Equity</b><br>What would be the impact on health equity?                                                                                                                                                                                                                   |                                                   |                                  |
| <b>JUDGEMENT</b>                                                                                                                                                                                                                                                              | <b>RESEARCH EVIDENCE</b>                          | <b>ADDITIONAL CONSIDERATIONS</b> |
| <input type="radio"/> Reduced<br><input type="radio"/> Probably reduced<br><input type="radio"/> Probably no impact<br><input type="radio"/> Probably increased<br><input type="radio"/> Increased<br><input type="radio"/> Varies<br><input type="radio"/> <b>Don't know</b> | Not systematically reviewed as a part of this TF. |                                  |
| <b>Acceptability</b><br>Is the intervention acceptable to key stakeholders?                                                                                                                                                                                                   |                                                   |                                  |
| <b>JUDGEMENT</b>                                                                                                                                                                                                                                                              | <b>RESEARCH EVIDENCE</b>                          | <b>ADDITIONAL CONSIDERATIONS</b> |
| <input type="radio"/> No<br><input type="radio"/> Probably no<br><input type="radio"/> Probably yes<br><input type="radio"/> Yes<br><input type="radio"/> Varies<br><input type="radio"/> <b>Don't know</b>                                                                   | Not systematically reviewed as a part of this TF. |                                  |
| <b>Feasibility</b><br>Is the intervention feasible to implement?                                                                                                                                                                                                              |                                                   |                                  |
| <b>JUDGEMENT</b>                                                                                                                                                                                                                                                              | <b>RESEARCH EVIDENCE</b>                          | <b>ADDITIONAL CONSIDERATIONS</b> |
| <input type="radio"/> No<br><input type="radio"/> Probably no<br><input type="radio"/> Probably yes<br><input type="radio"/> Yes                                                                                                                                              | Not systematically reviewed as a part of this TF. |                                  |

|                                                                         |  |  |
|-------------------------------------------------------------------------|--|--|
| <input type="radio"/> Varies<br><input type="radio"/> <b>Don't know</b> |  |  |
|-------------------------------------------------------------------------|--|--|

## TYPE OF RECOMMENDATION

|                                                                                    |                                                                                         |                                                                                                              |                                                                                                       |                                                                                |
|------------------------------------------------------------------------------------|-----------------------------------------------------------------------------------------|--------------------------------------------------------------------------------------------------------------|-------------------------------------------------------------------------------------------------------|--------------------------------------------------------------------------------|
| <p>Strong recommendation against the intervention</p> <p><input type="radio"/></p> | <p>Conditional recommendation against the intervention</p> <p><input type="radio"/></p> | <p>Conditional recommendation for either the intervention or the comparison</p> <p><input type="radio"/></p> | <p><b>Conditional recommendation for the intervention</b></p> <p><input checked="" type="radio"/></p> | <p>Strong recommendation for the intervention</p> <p><input type="radio"/></p> |
|------------------------------------------------------------------------------------|-----------------------------------------------------------------------------------------|--------------------------------------------------------------------------------------------------------------|-------------------------------------------------------------------------------------------------------|--------------------------------------------------------------------------------|

## CONCLUSIONS

### Recommendation

*We suggest integrating specific risk factors (eventually computed into clinical scores) based on local epidemiology and previous colonisation to guide decisions regarding drug-resistant pathogen (excluding those immunocompromised) for the empiric antibiotic prescription of sCAP patients (conditional recommendation, moderate quality of evidence).*

Question 8. Do patients with sCAP and aspiration risk factors have better outcomes (mortality, LOS, treatment failure) if treated with a risk-based therapy regimen instead of standard sCAP antibiotics?

#### PRISMA Flow Diagram

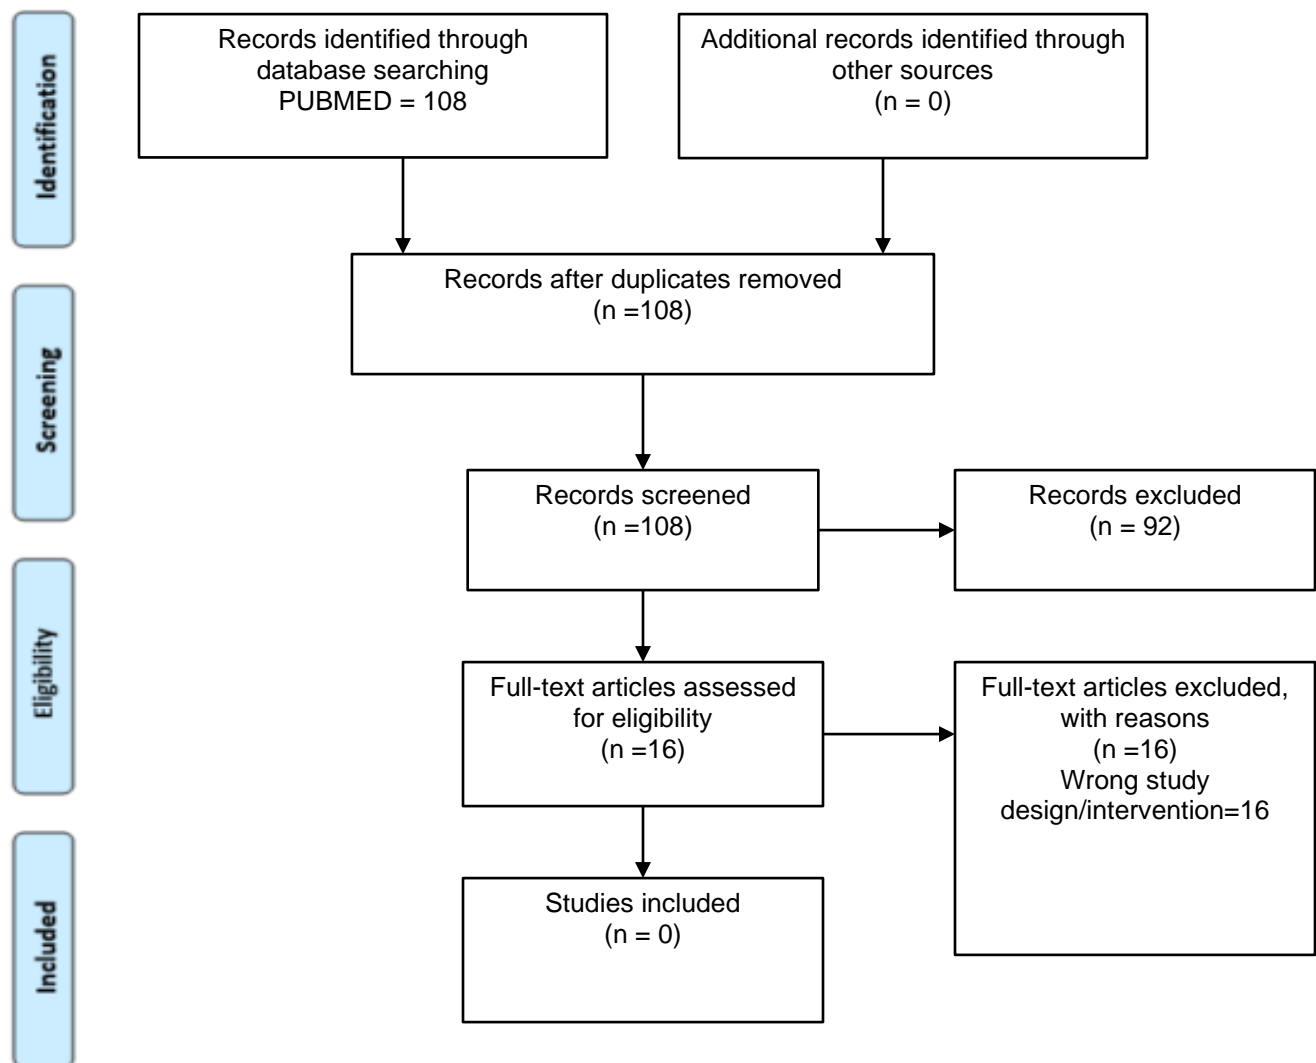

From: Moher D, Liberati A, Tetzlaff J, Altman DG, The PRISMA Group (2009). Preferred Reporting Items for Systematic Reviews and Meta-Analyses: The PRISMA Statement. PLoS Med 6(6): e1000097. doi:10.1371/journal.pmed1000097

For more information, visit [www.prisma-statement.org](http://www.prisma-statement.org).

## Evidence to Decision (EtD) Frameworks

**Question 8. Do patients with sCAP and aspiration risk factors have better outcomes (mortality, LOS, treatment failure) if treated with a risk-based therapy regimen instead of standard sCAP antibiotics?**

|               |                                                                              |
|---------------|------------------------------------------------------------------------------|
| POPULATION:   | sCAP patients with aspiration risk factors                                   |
| INTERVENTION: | use of a risk-based therapy regimen providing therapy for anaerobic bacteria |
| COMPARISON:   | standard sCAP therapy, based on risk factors for MDR pathogens               |

## Assessment

| Problem                                                                                                                                                                                                        |                                                                                                                                                                                                                                                                                                                                                                                      |                                                                                                                                                                                                                                                                                                                                |
|----------------------------------------------------------------------------------------------------------------------------------------------------------------------------------------------------------------|--------------------------------------------------------------------------------------------------------------------------------------------------------------------------------------------------------------------------------------------------------------------------------------------------------------------------------------------------------------------------------------|--------------------------------------------------------------------------------------------------------------------------------------------------------------------------------------------------------------------------------------------------------------------------------------------------------------------------------|
| Is the problem a priority?                                                                                                                                                                                     |                                                                                                                                                                                                                                                                                                                                                                                      |                                                                                                                                                                                                                                                                                                                                |
| Judgement                                                                                                                                                                                                      | RESEARCH EVIDENCE                                                                                                                                                                                                                                                                                                                                                                    | ADDITIONAL CONSIDERATIONS                                                                                                                                                                                                                                                                                                      |
| <input type="radio"/> No<br><input type="radio"/> Probably<br><input type="radio"/> Probably<br><input type="radio"/> Yes<br><input checked="" type="radio"/> <b>Varies</b><br><input type="radio"/> Don't     | <p>no<br/>yes<br/>know</p> <p>No prospective RCTs to address this question, but the use of specific anti-anaerobic antibiotic therapy is not standardized and benefits are not known. Some need to get data to standardize the approach to therapy.</p> <p>Among the studies done, there is no proven benefit of specific anti-anaerobic therapy, no real data in sCAP patients.</p> | <p>Routine use of anti-anaerobic therapy could create harm, and benefits are not clear.</p>                                                                                                                                                                                                                                    |
| Desirable Effects                                                                                                                                                                                              |                                                                                                                                                                                                                                                                                                                                                                                      |                                                                                                                                                                                                                                                                                                                                |
| How substantial are the desirable anticipated effects?                                                                                                                                                         |                                                                                                                                                                                                                                                                                                                                                                                      |                                                                                                                                                                                                                                                                                                                                |
| Judgement                                                                                                                                                                                                      | RESEARCH EVIDENCE                                                                                                                                                                                                                                                                                                                                                                    | ADDITIONAL CONSIDERATIONS                                                                                                                                                                                                                                                                                                      |
| <input type="radio"/> Trivial<br><input type="radio"/> Small<br><input type="radio"/> Moderate<br><input type="radio"/> Large<br><input checked="" type="radio"/> <b>Varies</b><br><input type="radio"/> Don't | <p>know</p> <p>No evidence that coverage of anaerobic bacteria improves outcome No evidence that coverage of anaerobic bacteria can prevent progression to lung abscess in high risk patients</p>                                                                                                                                                                                    | <p>Anaerobic bacteria are not very common in aspiration pneumonia, with gram-negatives being identified more often</p> <p>Use of high oxygen concentrations may eradicate anaerobic bacteria, independent of antibiotic choice</p> <p>Most standard sCAP therapies can eradicate anaerobic bacteria either directly, or by</p> |

|                                                                                                                                                                                                                     |                                                                                                                                                                                                                                          |                                                                                                                                                                       |
|---------------------------------------------------------------------------------------------------------------------------------------------------------------------------------------------------------------------|------------------------------------------------------------------------------------------------------------------------------------------------------------------------------------------------------------------------------------------|-----------------------------------------------------------------------------------------------------------------------------------------------------------------------|
|                                                                                                                                                                                                                     |                                                                                                                                                                                                                                          | eradicating other pathogens, on which anaerobes depend.                                                                                                               |
| <b>Undesirable Effects</b><br>How substantial are the undesirable anticipated effects?                                                                                                                              |                                                                                                                                                                                                                                          |                                                                                                                                                                       |
| Judgement                                                                                                                                                                                                           | RESEARCH EVIDENCE                                                                                                                                                                                                                        | ADDITIONAL CONSIDERATIONS                                                                                                                                             |
| <input type="radio"/> Large<br><input checked="" type="radio"/> <b>Moderate</b><br><input type="radio"/> Small<br><input type="radio"/> Trivial<br><input type="radio"/> Varies<br><input type="radio"/> Don't know | Use of anti-anaerobic therapy may lead to <i>C. difficile</i> infection<br><br>Use of anti-anaerobic therapy can add to the emergence of resistant gram—positive and gram-negative organisms, potentially without providing any benefit. |                                                                                                                                                                       |
| <b>Certainty of evidence</b><br>What is the overall certainty of the evidence of effects?                                                                                                                           |                                                                                                                                                                                                                                          |                                                                                                                                                                       |
| JUDGEMENT                                                                                                                                                                                                           | RESEARCH EVIDENCE                                                                                                                                                                                                                        | ADDITIONAL CONSIDERATIONS                                                                                                                                             |
| <input type="radio"/> <b>Very low</b><br><input type="radio"/> Low<br><input type="radio"/> Moderate<br><input type="radio"/> High<br><input type="radio"/> No included studies                                     | Not formally assessed as no studies were included.<br><br>No prospective RCTs of this question in sCAP patients<br><br>Few sCAP patients studied in trials already done                                                                  | Presumed benefits and harms are extrapolated from theoretical considerations and bacteriologic data, but no direct information in sCAP patients with aspiration risks |
| <b>Values</b><br>Is there important uncertainty about or variability in how much people value the main outcomes?                                                                                                    |                                                                                                                                                                                                                                          |                                                                                                                                                                       |
| Judgement                                                                                                                                                                                                           | RESEARCH EVIDENCE                                                                                                                                                                                                                        | ADDITIONAL CONSIDERATIONS                                                                                                                                             |
| <input type="radio"/> Important uncertainty or variability<br><input type="radio"/> <b>Possibly important uncertainty or variability</b><br><input type="radio"/> Probably no important                             | Not assessed.                                                                                                                                                                                                                            | Panel values an improved clinical outcome, but no data to indicate that choosing anti-anaerobic therapy can achieve this outcome.                                     |

|                                                                                                                                                                                                                                 |                                                                                                                                                                                |                                                                                                                                                                    |
|---------------------------------------------------------------------------------------------------------------------------------------------------------------------------------------------------------------------------------|--------------------------------------------------------------------------------------------------------------------------------------------------------------------------------|--------------------------------------------------------------------------------------------------------------------------------------------------------------------|
| uncertainty or variability<br>o No important uncertainty or variability                                                                                                                                                         |                                                                                                                                                                                | Panel also values avoiding the undesirable effects above, but also no data to show that therapy choice can have this impact.                                       |
| <b>Balance of effects</b><br>Does the balance between desirable and undesirable effects favor the intervention or the comparison?                                                                                               |                                                                                                                                                                                |                                                                                                                                                                    |
| <b>Judgement</b>                                                                                                                                                                                                                | RESEARCH EVIDENCE                                                                                                                                                              | ADDITIONAL CONSIDERATIONS                                                                                                                                          |
| o Favors the comparison<br>o <b>Probably favors the comparison</b><br>o Does not favor either the intervention or the comparison<br>o Probably favors the intervention<br>o Favors the intervention<br>o Varies<br>o Don't know | Based on available indirect evidence , no improved outcome with anti-anaerobic therapy, and thus no need to modify empiric antibiotic choice, based on aspiration risk factors | No data to identify if there are specific populations with aspiration risks who might benefit from anti-anaerobic therapy<br><br>No data focused on sCAP patients. |
| <b>Resources required</b><br>How large are the resource requirements (costs)?                                                                                                                                                   |                                                                                                                                                                                |                                                                                                                                                                    |
| <b>JUDGEMENT</b>                                                                                                                                                                                                                | RESEARCH EVIDENCE                                                                                                                                                              | ADDITIONAL CONSIDERATIONS                                                                                                                                          |
| o Large costs<br>o Moderate costs<br>o Negligible costs and savings<br>o Moderate savings<br>o Large savings<br>o Varies<br>o <b>Don't know</b>                                                                                 | Not assessed.                                                                                                                                                                  | but could be considerable if no clinical benefit, but the undesirable effects cited above do occur                                                                 |
| <b>Certainty of evidence of required resources</b><br>What is the certainty of the evidence of resource requirements (costs)?                                                                                                   |                                                                                                                                                                                |                                                                                                                                                                    |
| <b>JUDGEMENT</b>                                                                                                                                                                                                                | RESEARCH EVIDENCE                                                                                                                                                              | ADDITIONAL CONSIDERATIONS                                                                                                                                          |

|                                                                                                                                                                                 |               |                                                                                                                               |
|---------------------------------------------------------------------------------------------------------------------------------------------------------------------------------|---------------|-------------------------------------------------------------------------------------------------------------------------------|
| <input type="radio"/> Very low<br><input type="radio"/> Low<br><input type="radio"/> Moderate<br><input type="radio"/> High<br><input type="radio"/> <b>No included studies</b> | Not assessed. | Would be dependent on the frequency of benefit and the incidence of harm/complications, which is not known in this population |
|---------------------------------------------------------------------------------------------------------------------------------------------------------------------------------|---------------|-------------------------------------------------------------------------------------------------------------------------------|

### Cost effectiveness

Does the cost-effectiveness of the intervention favor the intervention or the comparison?

| JUDGEMENT                                                                                                                                                                                                                                                                                                                                                                            | RESEARCH EVIDENCE | ADDITIONAL CONSIDERATIONS                                                                                |
|--------------------------------------------------------------------------------------------------------------------------------------------------------------------------------------------------------------------------------------------------------------------------------------------------------------------------------------------------------------------------------------|-------------------|----------------------------------------------------------------------------------------------------------|
| <input type="radio"/> Favors the comparison<br><input type="radio"/> <b>Probably favors the comparison</b><br><input type="radio"/> Does not favor either the intervention or the comparison<br><input type="radio"/> Probably favors the intervention<br><input type="radio"/> Favors the intervention<br><input type="radio"/> Varies<br><input type="radio"/> No included studies | Not assessed      | No direct data, but if there is harm, without benefit, then the comparator would be more cost effective. |

### Equity

What would be the impact on health equity?

| JUDGEMENT                                                                                                                                                                                                                                                                     | RESEARCH EVIDENCE | ADDITIONAL CONSIDERATIONS |
|-------------------------------------------------------------------------------------------------------------------------------------------------------------------------------------------------------------------------------------------------------------------------------|-------------------|---------------------------|
| <input type="radio"/> Reduced<br><input type="radio"/> Probably reduced<br><input type="radio"/> Probably no impact<br><input type="radio"/> Probably increased<br><input type="radio"/> Increased<br><input type="radio"/> Varies<br><input type="radio"/> <b>Don't know</b> | Not assessed      |                           |

### Acceptability

Is the intervention acceptable to key stakeholders?

| JUDGEMENT | RESEARCH EVIDENCE | ADDITIONAL CONSIDERATIONS |
|-----------|-------------------|---------------------------|
|           |                   |                           |

|                                                                                                                                                                                                      |                   |                   |                                                                                                                                                                          |
|------------------------------------------------------------------------------------------------------------------------------------------------------------------------------------------------------|-------------------|-------------------|--------------------------------------------------------------------------------------------------------------------------------------------------------------------------|
| <input type="radio"/> No<br><input type="radio"/> Probably<br><input type="radio"/> Probably<br><input type="radio"/> Yes<br><input type="radio"/> Varies<br><input type="radio"/> <b>Don't know</b> | no<br>yes         | Not assessed      | Presumed that key stakeholders will determine acceptability based on the balance between desired and undesired effects, which are not directly known for this population |
| <b>Feasibility</b><br>Is the intervention feasible to implement?                                                                                                                                     |                   |                   |                                                                                                                                                                          |
| JUDGEMENT                                                                                                                                                                                            |                   | RESEARCH EVIDENCE | ADDITIONAL CONSIDERATIONS                                                                                                                                                |
| <input type="radio"/> No<br><input type="radio"/> Probably<br><input type="radio"/> Probably<br><input type="radio"/> <b>Yes</b><br><input type="radio"/> Varies<br><input type="radio"/> Don't      | no<br>yes<br>know | Not assessed      | Choice of different empiric antibiotics will be easy to implement if supported by data and guidelines.                                                                   |

## TYPE OF RECOMMENDATION

|                                                |                                                            |                                                                          |                                                 |                                            |
|------------------------------------------------|------------------------------------------------------------|--------------------------------------------------------------------------|-------------------------------------------------|--------------------------------------------|
| Strong recommendation against the intervention | <b>Conditional recommendation against the intervention</b> | Conditional recommendation for either the intervention or the comparison | Conditional recommendation for the intervention | Strong recommendation for the intervention |
| <input type="radio"/>                          | <input checked="" type="radio"/>                           | <input type="radio"/>                                                    | <input type="radio"/>                           | <input type="radio"/>                      |

## Conclusions

### Recommendation

*In patients with sCAP and aspiration risk factors we suggest standard CAP therapy regimen and not specific therapy targeting anaerobic bacteria (ungraded, good practice statement).*



### Good Practise Statement Checklist

(From: Guyatt, Gordon H., et al. "Guideline panels should not GRADE good practice statements." *Journal of clinical epidemiology* 68.5 (2015): 597.)

|   | Questions                                                                                      | Response                                                                                                                                                                      |
|---|------------------------------------------------------------------------------------------------|-------------------------------------------------------------------------------------------------------------------------------------------------------------------------------|
| 1 | Is the statement clear and actionable?                                                         | Yes, it is not necessary to use specific anti-anaerobic therapy for severe aspiration pneumonia and standard therapy is effective. Clinicians can act on this recommendation. |
| 2 | Is the message really necessary?                                                               | Yes, so that unnecessary anti-anaerobic therapy and its attendant risk for clostridium difficile colitis can be avoided.                                                      |
| 3 | Is the net benefit large and unequivocal?                                                      | Avoiding collateral damage from unnecessary anti-anaerobic therapy has direct patient care benefits.                                                                          |
| 4 | Is the evidence difficult to collect and summarize?                                            | No, it has been summarized in the statement. There are no direct studies of the specific question and this is also stated in the summary.                                     |
| 5 | If a public health guideline, are there specific issues that should be considered (eg, equity) | Not applicable                                                                                                                                                                |
| 6 | Have you made the rationale explicit?                                                          | Yes                                                                                                                                                                           |
| 7 | Is this better to be formally GRADEd?                                                          | No, not enough relevant direct evidence.                                                                                                                                      |

## Search strategies

**Question 1: In patients with sCAP should rapid microbiologic techniques be added to current testing of blood and respiratory tract samples?**

Note: Population modified from other searches in this guideline to include Pneumococcal Infections and Streptococcus pneumoniae due to nature of the intervention

### Search 1 – SRs/MAs/HTAs

Search date: August 27, 2019

Databases searched: Ovid MEDLINE: Epub Ahead of Print, In-Process & Other Non-Indexed Citations, Ovid MEDLINE® Daily and Ovid MEDLINE® 1946-Present, Embase Classic+Embase 1947 to 2019 August 26; Wiley Cochrane

Limits: Humans

Excluded: Letters, notes, comments, editorials, case reports

Study design filter: Systematic Review/Meta-Analyses, Health Technology Assessments

Ovid MEDLINE(R), Embase

| # | Searches                                                                                                                      | Results    |
|---|-------------------------------------------------------------------------------------------------------------------------------|------------|
| 1 | exp Pneumonia/                                                                                                                | 392105     |
| 2 | exp Pneumococcal Infections/ use ppez or pneumococcal infection/ use emczd or exp Streptococcus pneumoniae/ use ppez          | 39521      |
| 3 | (pneumoni* or peripneumoni* or pleuropneumoni* pneumococc* or lobitis or ((pulmon* or lung*) adj inflammation*)).ti,ab,kf,kw. | 451975     |
| 4 | or/1-3                                                                                                                        | 629397     |
| 5 | exp Polymerase Chain Reaction/                                                                                                | 130148     |
| 6 | *C-Reactive Protein/ use ppez                                                                                                 | 6<br>16974 |
| 7 | *C Reactive Protein/ use emczd                                                                                                | 23166      |

|        |                                                                                                                                                                                                         |             |
|--------|---------------------------------------------------------------------------------------------------------------------------------------------------------------------------------------------------------|-------------|
| 8      | *Procalcitonin/                                                                                                                                                                                         | 4560        |
| 9      | *Spectrometry, Mass, Matrix-Assisted Laser Desorption-Ionization/ use ppez                                                                                                                              | 8561        |
| 1<br>0 | *matrix-assisted laser desorption-ionization mass spectrometry/ use emczd                                                                                                                               | 729         |
| 1<br>1 | exp Molecular Diagnostic Techniques/ use ppez                                                                                                                                                           | 16600       |
| 1<br>2 | *In Situ Hybridization, Fluorescence/ use ppez                                                                                                                                                          | 6384        |
| 1<br>3 | exp molecular diagnosis/ use emczd or *fluorescence in situ hybridization/ use emczd                                                                                                                    | 24103       |
| 1<br>4 | exp Rapid Test/ use emczd                                                                                                                                                                               | 10856       |
| 1<br>5 | exp Point-of-Care Systems/ use ppez                                                                                                                                                                     | 13065       |
| 1<br>6 | exp "point of care testing"/ use emczd                                                                                                                                                                  | 12073       |
| 1<br>7 | *Biological Markers/                                                                                                                                                                                    | 82823       |
| 1<br>8 | exp *Immunoassay/                                                                                                                                                                                       | 107103      |
| 1<br>9 | ((rapid* or real?time or point of care or poc or bedside) adj2 (test* or detect* or identification or diagnos* or assay* or immunoassay* or immunofluores* or 156152 microimmunofluores*)).ti,ab,kf,kw. | 156152      |
| 2<br>0 | ((nucleic acid amplification or crp or c reactive protein or procalcitonin) adj2 (test* or assay*)).ti,ab,kf,kw.                                                                                        | 9744        |
| 2<br>1 | ((Enzyme adj2 immunoassay) or (urinary adj antigen*) or (urine adj antigen*) or lateral flow assay*).ti,ab,kf,kw.                                                                                       | 55179       |
| 2<br>2 | or/5-21                                                                                                                                                                                                 | 175432<br>7 |

|             |                                                                                                                                                                                                                                                                                                                                                              |             |
|-------------|--------------------------------------------------------------------------------------------------------------------------------------------------------------------------------------------------------------------------------------------------------------------------------------------------------------------------------------------------------------|-------------|
| 2<br>3      | 4 and 22                                                                                                                                                                                                                                                                                                                                                     | 37094       |
| 2<br>4      | animals/ not (humans/ and animals/)                                                                                                                                                                                                                                                                                                                          | 595460<br>1 |
| 2<br>5      | 23 not 24                                                                                                                                                                                                                                                                                                                                                    | 35366       |
| 2<br>6      | limit 24 to (case reports or comment or congress or editorial or letter or conference abstract or note) [Limit not valid in Ovid MEDLINE(R),Ovid MEDLINE(R) Daily Update,Ovid MEDLINE(R) In-Process,Ovid MEDLINE(R) Publisher,Embase; records were retained]                                                                                                 | 125057      |
| 2<br>7      | Case Report/                                                                                                                                                                                                                                                                                                                                                 | 453525<br>2 |
| 2<br>8      | 25 not (26 or 27)                                                                                                                                                                                                                                                                                                                                            | 30705       |
| 2<br>9      | meta-analysis/ or systematic review/ or meta-analysis as topic/ or "meta analysis (topic)"/ or "systematic review (topic)"/ or exp technology assessment, biomedical/                                                                                                                                                                                        | 559008      |
| 3<br>0      | Meta Analysis.pt.                                                                                                                                                                                                                                                                                                                                            | 104127      |
| 3<br>1      | (meta analy* or metaanaly* or health technolog* assess*).ti,ab,kf,kw.                                                                                                                                                                                                                                                                                        | 372309      |
| 3<br>2      | (meta-analy* or metaanaly* or systematic review* or biomedical technology assessment* or bio-medical technology assessment*).mp,hw.                                                                                                                                                                                                                          | 715776      |
| 3<br>3<br>3 | ((systematic* or methodologic*) adj3 (review* or overview*)) or pooled analysis or published studies or published literature or hand search* or handsearch* or medline or pub med or pubmed or embase or cochrane or cinahl or data syntheses* or data extraction* or HTA or HTAs or (technolog* adj (assessment* or overview* or appraisal*))).ti,ab,kf,kw. | 738258      |
| 3<br>4      | (cochrane or (health adj2 technology assessment) or evidence report).jw.                                                                                                                                                                                                                                                                                     | 44099       |
| 3<br>5      | or/29-34                                                                                                                                                                                                                                                                                                                                                     | 998524      |

|        |                           |     |
|--------|---------------------------|-----|
| 3<br>6 | 28 and 35                 | 511 |
| 3<br>7 | remove duplicates from 36 | 432 |

### Wiley Cochrane

- #1 MeSH descriptor: [Pneumonia] explode all trees 3179
- #2 MeSH descriptor: [Pneumococcal Infections] explode all trees 678
- #3 MeSH descriptor: [Streptococcus pneumoniae] explode all trees 550
- #4 (pneumoni\* or peripneumoni\* or pleuropneumoni\* pneumococc\* or lobitis or ((pulmon\* or lung\*) next/1 inflammation\*)):ti4387
- #5 #1 or #2 or #3 or #4 6562
- #6 MeSH descriptor: [Polymerase Chain Reaction] explode all trees 2196
- #7 MeSH descriptor: [C-Reactive Protein] explode all trees 4407
- #8 MeSH descriptor: [Procalcitonin] explode all trees 10
- #9 MeSH descriptor: [Spectrometry, Mass, Matrix-Assisted Laser Desorption-Ionization] explode all trees 64
- #10 MeSH descriptor: [Molecular Diagnostic Techniques] explode all trees 54
- #11 MeSH descriptor: [In Situ Hybridization, Fluorescence] explode all trees 219
- #12 MeSH descriptor: [Point-of-Care Systems] explode all trees 450
- #13 MeSH descriptor: [Biomarkers] explode all trees 19321
- #14 MeSH descriptor: [Immunoassay] explode all trees 4679
- #15 ((rapid\* or real-time or real time or point of care or poc or bedside) near/2 (test\* or detect\* or identification or diagnos\* or assay\* or immunoassay\* or immunofluores\* or microimmunofluores\*)):ti,ab 121559
- #16 ((nucleic acid amplification or crp or c reactive protein or procalcitonin) near/2 (test\* or assay\*)):ti,ab 2470
- #17 ((Enzyme near/2 immunoassay) or (urinary near/1 antigen\*) or (urine near/1 antigen\*) or lateral flow assay\*):ti,ab 898
- #18 #6 or #7 or #8 or #9 or #10 or #11 or #12 or #13 or #14 or #15 or #16 or #17 148158
- #19 #5 AND #18 in Cochrane Reviews 14

### Search 2 – Clinical Trials/Comparative Studies

Search date: August 26, 2019

Databases searched: Ovid MEDLINE: Epub Ahead of Print, In-Process & Other Non-Indexed Citations, Ovid MEDLINE® Daily and Ovid MEDLINE® 1946-Present, Embase Classic+Embase 1947 to 2019 August 26; Wiley Cochrane

Limits: Humans

Excluded: Letters, notes, comments, editorials, case reports

Study design filter: RCTs/Clinical Trials/Comparative Studies

Ovid MEDLINE(R), Embase

| #  | Searches                                                                                                                      | Results    |
|----|-------------------------------------------------------------------------------------------------------------------------------|------------|
| 1  | exp Pneumonia/                                                                                                                | 392105     |
| 2  | exp Pneumococcal Infections/ use ppez or pneumococcal infection/ use emcxd or exp Streptococcus pneumoniae/ use ppez          | 39521      |
| 3  | (pneumoni* or peripneumoni* or pleuropneumoni* pneumococc* or lobitis or ((pulmon* or lung*) adj inflammation*)).ti,ab,kf,kw. | 451975     |
| 4  | or/1-3                                                                                                                        | 629397     |
| 5  | exp Polymerase Chain Reaction/                                                                                                | 130148     |
| 6  | *C-Reactive Protein/ use ppez                                                                                                 | 6<br>16974 |
| 7  | *C Reactive Protein/ use emcxd                                                                                                | 23166      |
| 8  | *Procalcitonin/                                                                                                               | 4560       |
| 9  | *Spectrometry, Mass, Matrix-Assisted Laser Desorption-Ionization/ use ppez                                                    | 8561       |
| 10 | *matrix-assisted laser desorption-ionization mass spectrometry/ use emcxd                                                     | 729        |
| 11 | exp Molecular Diagnostic Techniques/ use ppez                                                                                 | 16600      |

|        |                                                                                                                                                                                                  |             |
|--------|--------------------------------------------------------------------------------------------------------------------------------------------------------------------------------------------------|-------------|
| 1<br>2 | *In Situ Hybridization, Fluorescence/ use ppez                                                                                                                                                   | 6384        |
| 1<br>3 | exp molecular diagnosis/ use emczd or *fluorescence in situ hybridization/ use emczd                                                                                                             | 24103       |
| 1<br>4 | exp Rapid Test/ use emczd                                                                                                                                                                        | 10856       |
| 1<br>5 | exp Point-of-Care Systems/ use ppez                                                                                                                                                              | 13065       |
| 1<br>6 | exp "point of care testing"/ use emczd                                                                                                                                                           | 12073       |
| 1<br>7 | *Biological Markers/                                                                                                                                                                             | 82823       |
| 1<br>8 | exp *Immunoassay/                                                                                                                                                                                | 107103      |
| 1<br>9 | ((rapid* or real?time or point of care or poc or bedside) adj2 (test* or detect* or identification or diagnos* or assay* or immunoassay* or immunofluores* or microimmunofluores*)).ti,ab,kf,kw. | 156152      |
| 2<br>0 | ((nucleic acid amplification or crp or c reactive protein or procalcitonin) adj2 (test* or assay*)).ti,ab,kf,kw.                                                                                 | 9744        |
| 2<br>1 | ((Enzyme adj2 immunoassay) or (urinary adj antigen*) or (urine adj antigen*) or lateral flow assay*).ti,ab,kf,kw.                                                                                | 55179       |
| 2<br>2 | or/5-21                                                                                                                                                                                          | 175432<br>7 |
| 2<br>3 | 4 and 22                                                                                                                                                                                         | 37094       |
| 2<br>4 | animals/ not (humans/ and animals/)                                                                                                                                                              | 595460<br>1 |
| 2<br>5 | 23 not 24                                                                                                                                                                                        | 35366       |

|   |                                                                                                                                                                                                                                                                                                                                                                                                                                                                                                                                                                                                                                                                                                                                                                                                                                                                                                                                                                                                                                                                                                                                                                                                                                                                                                                                                                            |        |
|---|----------------------------------------------------------------------------------------------------------------------------------------------------------------------------------------------------------------------------------------------------------------------------------------------------------------------------------------------------------------------------------------------------------------------------------------------------------------------------------------------------------------------------------------------------------------------------------------------------------------------------------------------------------------------------------------------------------------------------------------------------------------------------------------------------------------------------------------------------------------------------------------------------------------------------------------------------------------------------------------------------------------------------------------------------------------------------------------------------------------------------------------------------------------------------------------------------------------------------------------------------------------------------------------------------------------------------------------------------------------------------|--------|
| 2 | limit 24 to (case reports or comment or congress or editorial or letter or conference                                                                                                                                                                                                                                                                                                                                                                                                                                                                                                                                                                                                                                                                                                                                                                                                                                                                                                                                                                                                                                                                                                                                                                                                                                                                                      |        |
| 6 | abstract or note) [Limit not valid in Ovid MEDLINE(R),Ovid MEDLINE(R) Daily Update,Ovid MEDLINE(R) In-Process,Ovid MEDLINE(R) Publisher,Embase; records were retained]                                                                                                                                                                                                                                                                                                                                                                                                                                                                                                                                                                                                                                                                                                                                                                                                                                                                                                                                                                                                                                                                                                                                                                                                     | 125057 |
| 2 | Case Report/                                                                                                                                                                                                                                                                                                                                                                                                                                                                                                                                                                                                                                                                                                                                                                                                                                                                                                                                                                                                                                                                                                                                                                                                                                                                                                                                                               | 453525 |
| 7 |                                                                                                                                                                                                                                                                                                                                                                                                                                                                                                                                                                                                                                                                                                                                                                                                                                                                                                                                                                                                                                                                                                                                                                                                                                                                                                                                                                            | 2      |
| 2 | 25 not (26 or 27)                                                                                                                                                                                                                                                                                                                                                                                                                                                                                                                                                                                                                                                                                                                                                                                                                                                                                                                                                                                                                                                                                                                                                                                                                                                                                                                                                          | 30705  |
| 8 |                                                                                                                                                                                                                                                                                                                                                                                                                                                                                                                                                                                                                                                                                                                                                                                                                                                                                                                                                                                                                                                                                                                                                                                                                                                                                                                                                                            |        |
| 2 | Randomized Controlled Trial/ or exp Randomized Controlled Trials as Topic/ or "Randomized Controlled Trial (topic)"/ or Controlled Clinical Trial/ or exp Controlled Clinical Trials as Topic/ or "Controlled Clinical Trial (topic)"/ or Randomization/ or Random Allocation/ or Double-Blind Method/ or Double Blind Procedure/ or Double-Blind Studies/ or Single-Blind Method/ or Single Blind Procedure/ or Single-Blind Studies/ or Placebos/ or Placebo/ or (random* or sham or placebo*).ti,ab,hw,kf,kw. or ((singl* or doubl*) adj (blind* or dumm* or mask*)).ti,ab,hw,kf,kw. or ((tripl* or trebl*) adj (blind* or dumm* or mask*)).ti,ab,hw,kf,kw. or (control* adj3 (study or studies or trial* or group*)).ti,ab,hw,kf,kw. or (phase adj3 (III or "3") adj3 (study or studies or trial*)).ti,hw,kf,kw. or ((quasiexperimental or quasi-experimental) adj3 (study or studies or trial*)).ti,ab,hw,kf,kw. or ((pragmatic or practical) adj3 trial*).ti,ab,hw,kf,kw. or (pragmatic study or pragmatic studies).ti,ab,hw,kf,kw. or ((equivalence or superiority or non-inferiority or noninferiority) adj3 (study or studies or trial*)).ti,ab,hw,kf,kw. or ((open label or open-label) adj5 (study or studies or trial*)).ti,ab,hw,kf,kw. or allocated.ti,ab,hw. or (Nonrandom* or non random* or non-random* or quasi-random* or quasirandom*).ti,ab,hw,kf,kw. | 499088 |
| 9 |                                                                                                                                                                                                                                                                                                                                                                                                                                                                                                                                                                                                                                                                                                                                                                                                                                                                                                                                                                                                                                                                                                                                                                                                                                                                                                                                                                            | 5      |
| 3 | exp comparative study/                                                                                                                                                                                                                                                                                                                                                                                                                                                                                                                                                                                                                                                                                                                                                                                                                                                                                                                                                                                                                                                                                                                                                                                                                                                                                                                                                     | 322189 |
| 0 |                                                                                                                                                                                                                                                                                                                                                                                                                                                                                                                                                                                                                                                                                                                                                                                                                                                                                                                                                                                                                                                                                                                                                                                                                                                                                                                                                                            | 3      |
| 3 | (compare or compared or comparing or comparative or comparison).ti,kf,kw.                                                                                                                                                                                                                                                                                                                                                                                                                                                                                                                                                                                                                                                                                                                                                                                                                                                                                                                                                                                                                                                                                                                                                                                                                                                                                                  | 136602 |
| 1 |                                                                                                                                                                                                                                                                                                                                                                                                                                                                                                                                                                                                                                                                                                                                                                                                                                                                                                                                                                                                                                                                                                                                                                                                                                                                                                                                                                            | 8      |
| 3 | or/29-31                                                                                                                                                                                                                                                                                                                                                                                                                                                                                                                                                                                                                                                                                                                                                                                                                                                                                                                                                                                                                                                                                                                                                                                                                                                                                                                                                                   | 819946 |
| 2 |                                                                                                                                                                                                                                                                                                                                                                                                                                                                                                                                                                                                                                                                                                                                                                                                                                                                                                                                                                                                                                                                                                                                                                                                                                                                                                                                                                            | 1      |
| 3 | 28 and 32                                                                                                                                                                                                                                                                                                                                                                                                                                                                                                                                                                                                                                                                                                                                                                                                                                                                                                                                                                                                                                                                                                                                                                                                                                                                                                                                                                  | 5564   |
| 3 |                                                                                                                                                                                                                                                                                                                                                                                                                                                                                                                                                                                                                                                                                                                                                                                                                                                                                                                                                                                                                                                                                                                                                                                                                                                                                                                                                                            |        |
| 3 | remove duplicates from 33                                                                                                                                                                                                                                                                                                                                                                                                                                                                                                                                                                                                                                                                                                                                                                                                                                                                                                                                                                                                                                                                                                                                                                                                                                                                                                                                                  | 4615   |
| 4 |                                                                                                                                                                                                                                                                                                                                                                                                                                                                                                                                                                                                                                                                                                                                                                                                                                                                                                                                                                                                                                                                                                                                                                                                                                                                                                                                                                            |        |



| ID  | Search Hits                                                                                                                                                                                                     |
|-----|-----------------------------------------------------------------------------------------------------------------------------------------------------------------------------------------------------------------|
| #1  | MeSH descriptor: [Pneumonia] explode all trees 3179                                                                                                                                                             |
| #2  | MeSH descriptor: [Pneumococcal Infections] explode all trees 678                                                                                                                                                |
| #3  | MeSH descriptor: [Streptococcus pneumoniae] explode all trees 550                                                                                                                                               |
| #4  | (pneumoni* or peripneumoni* or pleuropneumoni* pneumococc* or lobitis or ((pulmon* or lung*) next/1 inflammation*)):ti,ab 12577                                                                                 |
| #5  | #1 or #2 or #3 or #4 13729                                                                                                                                                                                      |
| #6  | MeSH descriptor: [Polymerase Chain Reaction] explode all trees 2196                                                                                                                                             |
| #7  | MeSH descriptor: [C-Reactive Protein] explode all trees 4407                                                                                                                                                    |
| #8  | MeSH descriptor: [Procalcitonin] explode all trees 10                                                                                                                                                           |
| #9  | MeSH descriptor: [Spectrometry, Mass, Matrix-Assisted Laser Desorption-Ionization] explode all trees 64                                                                                                         |
| #10 | MeSH descriptor: [Molecular Diagnostic Techniques] explode all trees 54                                                                                                                                         |
| #11 | MeSH descriptor: [In Situ Hybridization, Fluorescence] explode all trees 219                                                                                                                                    |
| #12 | MeSH descriptor: [Point-of-Care Systems] explode all trees 450                                                                                                                                                  |
| #13 | MeSH descriptor: [Biomarkers] explode all trees 19321                                                                                                                                                           |
| #14 | MeSH descriptor: [Immunoassay] explode all trees 4679                                                                                                                                                           |
| #15 | ((rapid* or real-time or real time or point of care or poc or bedside) near/2 (test* or detect* or identification or diagnos* or assay* or immunoassay* or immunofluores* or microimmunofluores*)):ti,ab 121559 |
| #16 | ((nucleic acid amplification or crp or c reactive protein or procalcitonin) near/2 (test* or assay*)):ti,ab 2470                                                                                                |
| #17 | ((Enzyme near/2 immunoassay) or (urinary near/1 antigen*) or (urine near/1 antigen*) or lateral flow assay*):ti,ab 898                                                                                          |
| #18 | #6 or #7 or #8 or #9 or #10 or #11 or #12 or #13 or #14 or #15 or #16 or #17 148158                                                                                                                             |
| #19 | #5 AND #18 in Trials 1975                                                                                                                                                                                       |

### Search 3

Search date: July 24, 2019

Databases searched: Ovid MEDLINE: Epub Ahead of Print, In-Process & Other Non-Indexed Citations, Ovid MEDLINE® Daily and Ovid MEDLINE® 1946-Present, Embase Classic+Embase 1947 to 2019 July 23; Wiley Cochrane

Limits: Humans

Exclusions: Letters, notes, editorials, conferences/congresses, comments, case reports

Ovid MEDLINE(R), Embase

| #  | Searches                                                                                                            | Results     |
|----|---------------------------------------------------------------------------------------------------------------------|-------------|
| 1  | exp Pneumonia/                                                                                                      | 389908      |
| 2  | (pneumoni* or peripneumoni* or pleuropneumoni* or lobitis or ((pulmon* or lung*)<br>adj inflammation*)).ti,ab.      | 444330      |
| 3  | 1 or 2                                                                                                              | 609710      |
| 4  | *bacterial infection/di [Diagnosis]                                                                                 | 12781       |
| 5  | *Virus Diseases/di [Diagnosis]                                                                                      | 9026        |
| 6  | *virus diagnosis/ use emczd                                                                                         | 806         |
| 7  | *Polymerase Chain Reaction/                                                                                         | 66945       |
| 8  | *Molecular Diagnostic Techniques/ use ppez                                                                          | 6407        |
| 9  | *In Situ Hybridization, Fluorescence/ use ppez                                                                      | 6369        |
| 10 | *diagnostic test/ use emczd or *molecular diagnosis/ use emczd or *fluorescence in situ<br>hybridization/ use emczd | 23579       |
| 11 | or/4-10                                                                                                             | 123225      |
| 12 | exp Time Factors/ use ppez or exp Time Factor/ use emczd                                                            | 118513<br>5 |
| 13 | exp Turnaround Time/ use emczd                                                                                      | 4519        |
| 14 | 12 or 13                                                                                                            | 118964<br>9 |
| 15 | 11 and 14                                                                                                           | 2796        |
| 16 | exp Rapid Test/ use emczd                                                                                           | 10704       |

|        |                                                                                                                                                                                                                                                              |             |
|--------|--------------------------------------------------------------------------------------------------------------------------------------------------------------------------------------------------------------------------------------------------------------|-------------|
| 1<br>7 | (rapid* adj2 (test* or detect* or identification or diagnos* or assay*)).ti,ab.                                                                                                                                                                              | 130149      |
| 1<br>8 | 15 or 16 or 17                                                                                                                                                                                                                                               | 137858      |
| 1<br>9 | 3 and 18                                                                                                                                                                                                                                                     | 4773        |
| 2<br>0 | animals/ not (humans/ and animals/)                                                                                                                                                                                                                          | 593955<br>1 |
| 2<br>1 | 19 not 20                                                                                                                                                                                                                                                    | 4676        |
| 2<br>2 | limit 21 to (case reports or comment or congress or editorial or letter or conference abstract or note) [Limit not valid in Ovid MEDLINE(R),Ovid MEDLINE(R) Daily Update,Ovid MEDLINE(R) In-Process,Ovid MEDLINE(R) Publisher,Embase; records were retained] | 874         |
| 2<br>3 | Case Report/                                                                                                                                                                                                                                                 | 451557<br>9 |
| 2<br>4 | 21 not (22 or 23)                                                                                                                                                                                                                                            | 3521        |
| 2<br>5 | remove duplicates from 24                                                                                                                                                                                                                                    | 2268        |

## Wiley Cochrane

| ID | Search Hits                                                                                                      |
|----|------------------------------------------------------------------------------------------------------------------|
| #1 | MeSH descriptor: [Pneumonia] explode all trees 3175                                                              |
| #2 | (pneumoni* or peripneumoni* or pleuropneumoni* or lobitis or ((pulmon* or lung*) adj inflammation*)):ti,ab 12177 |
| #3 | #1 or #2 12926                                                                                                   |
| #4 | MeSH descriptor: [Bacterial Infections] explode all trees 16280                                                  |
| #5 | MeSH descriptor: [Virus Diseases] explode all trees 26077                                                        |
| #6 | MeSH descriptor: [Polymerase Chain Reaction] explode all trees 2193                                              |

|     |                                                                                  |       |
|-----|----------------------------------------------------------------------------------|-------|
| #7  | MeSH descriptor: [Molecular Diagnostic Techniques] explode all trees             | 54    |
| #8  | MeSH descriptor: [In Situ Hybridization, Fluorescence] explode all trees         | 219   |
| #9  | #4 or #5 or #6 or #7 or #8                                                       | 42907 |
| #10 | MeSH descriptor: [Time Factors] explode all trees                                | 62663 |
| #11 | #9 and #10                                                                       | 3165  |
| #12 | (rapid* near/2 (test* or detect* or identification or diagnos* or assay*)):ti,ab | 2311  |
| #13 | #11 or #12                                                                       | 5408  |
| #14 | #3 and #13                                                                       | 215   |

**Question 2. In hypoxemic patients with sCAP, can either non-invasive mechanical ventilation (NIV) or high-flow nasal oxygen (HFNC) be used initially—rather than supplemental standard oxygen administration—to avoid intubation and reduce mortality?**

*Search date: June 9, 2019*

Databases searched: Ovid MEDLINE: Epub Ahead of Print, In-Process & Other Non-Indexed Citations, Ovid MEDLINE® Daily and Ovid MEDLINE® 1946-Present, Embase Classic+Embase 1947 to 2019 June 07; Wiley Cochrane

Limits: Human

Search Filters: Systematic Reviews, Meta-Analyses, Randomized Controlled Trials, Health Technology Assessments

Ovid MEDLINE(R), Embase

| #  | Searches                                                                                                         | Results |
|----|------------------------------------------------------------------------------------------------------------------|---------|
| 1  | exp Pneumonia/                                                                                                   | 386414  |
| 2  | (pneumoni* or peripneumoni* or pleuropneumoni* or lobitis or ((pulmon* or lung*) adj inflammation*).ti,ab,kf,kw. | 450431  |
| 3  | 1 or 2                                                                                                           | 610378  |
| 4  | exp Noninvasive Ventilation/                                                                                     | 9851    |
| 5  | exp Oxygen Inhalation Therapy/ use ppez                                                                          | 24890   |
| 6  | exp oxygen therapy/ use emczd                                                                                    | 33445   |
| 7  | (non?invasive adj4 ventilation).ti,ab,kf,kw.                                                                     | 10440   |
| 8  | ((high Flow or high-flow) adj2 (oxygen* or cannula* or therap*).ti,ab,kf,kw.                                     | 3803    |
| 9  | (hfno or hfnot or hfnc or hfn or niv).ti,ab,kf,kw.                                                               | 9745    |
| 10 | or/4-9                                                                                                           | 79089   |
| 11 | 3 and 10                                                                                                         | 6788    |

|             |                                                                                                                                                                                                                                                                                                                                                                                                                                                                                                                                                                                                               |             |
|-------------|---------------------------------------------------------------------------------------------------------------------------------------------------------------------------------------------------------------------------------------------------------------------------------------------------------------------------------------------------------------------------------------------------------------------------------------------------------------------------------------------------------------------------------------------------------------------------------------------------------------|-------------|
| 1<br>2      | animals/ not (humans/ and animals/)                                                                                                                                                                                                                                                                                                                                                                                                                                                                                                                                                                           | 592057<br>1 |
| 1<br>3      | 11 not 12                                                                                                                                                                                                                                                                                                                                                                                                                                                                                                                                                                                                     | 6748        |
| 1<br>4      | meta-analysis/ or systematic review/ or meta-analysis as topic/ or "meta analysis (topic)"/ or "systematic review (topic)"/ or exp technology assessment, biomedical/                                                                                                                                                                                                                                                                                                                                                                                                                                         | 540730      |
| 1<br>5      | Meta Analysis.pt.                                                                                                                                                                                                                                                                                                                                                                                                                                                                                                                                                                                             | 101693      |
| 1<br>6      | (meta analy* or metaanaly* or health technolog* assess*).ti,ab,kf,kw.                                                                                                                                                                                                                                                                                                                                                                                                                                                                                                                                         | 359116      |
| 1<br>7      | (meta-analy* or metaanaly* or systematic review* or biomedical technology assessment* or bio-medical technology assessment*).mp,hw.                                                                                                                                                                                                                                                                                                                                                                                                                                                                           | 691949      |
| 1<br>8      | (((systematic* or methodologic*) adj3 (review* or overview*)) or pooled analysis or published studies or published literature or hand search* or handsearch* or medline or pub med or pubmed or embase or cochrane or cinahl or data syntheses* or data extraction* or HTA or HTAs or (technolog* adj (assessment* or overview* or appraisal*))).ti,ab,kf,kw.                                                                                                                                                                                                                                                 | 715101      |
| 1<br>9      | (cochrane or (health adj2 technology assessment) or evidence report).jw.                                                                                                                                                                                                                                                                                                                                                                                                                                                                                                                                      | 43712       |
| 2<br>0<br>1 | (Randomized Controlled Trial or Pragmatic Clinical Trial).pt. or exp Randomized Controlled Trials as Topic/ or "Randomized Controlled Trial (topic)"/ or Randomized Controlled Trial/ or Randomization/ or Random Allocation/ or Double-Blind Method/ or Double Blind Procedure/ or Double-Blind Studies/ or Single-Blind Method/ or Single Blind Procedure/ or Single-Blind Studies/ or Placebos/ or Placebo/ or (random* or sham or placebo*).ti,ab,hw,kf,kw. or ((singl* or doubl*) adj (blind* or dumm* or mask*)).ti,ab,hw,kf,kw. or ((tripl* or trebl*) adj (blind* or dumm* or mask*)).ti,ab,hw,kf,kw. | 338633<br>5 |
| 2<br>1      | or/14-20                                                                                                                                                                                                                                                                                                                                                                                                                                                                                                                                                                                                      | 402932<br>5 |
| 2<br>2      | 13 and 21                                                                                                                                                                                                                                                                                                                                                                                                                                                                                                                                                                                                     | 894         |
| 2<br>3      | remove duplicates from 22                                                                                                                                                                                                                                                                                                                                                                                                                                                                                                                                                                                     | 741         |

## Wiley Cochrane Library

| ID  | Search Hits                                                                                                       |
|-----|-------------------------------------------------------------------------------------------------------------------|
| #1  | MeSH descriptor: [Pneumonia] explode all trees 3163                                                               |
| #2  | (pneumoni* or peripneumoni* or pleuropneumoni* or lobitis or ((pulmon* or lung*) NEAR inflammation*)):ti,ab 13108 |
| #3  | #1 or #2 13804                                                                                                    |
| #4  | MeSH descriptor: [Noninvasive Ventilation] explode all trees 186                                                  |
| #5  | MeSH descriptor: [Oxygen Inhalation Therapy] explode all trees 1415                                               |
| #6  | (non?invasive NEAR/4 ventilation):ti,ab 2057                                                                      |
| #7  | ((high Flow or high-flow) NEAR/2 (oxygen* or cannula* or therap*)):ti,ab 4249                                     |
| #8  | (hfno or hfnot or hfnc or hfn or niv):ti,ab 1160                                                                  |
| #9  | #4 or #5 or #6 or #7 or #8 7403                                                                                   |
| #10 | #3 and #9 312                                                                                                     |

## Antibiotics in SCAP (one common search for PICOs, 3, 4, 7)

### Search 1 – SRs/MAs/HTAs

Search date: April 29, 2019

Databases searched: Ovid MEDLINE: Epub Ahead of Print, In-Process & Other Non-Indexed Citations, Ovid MEDLINE® Daily and Ovid MEDLINE® 1946-Present, Embase Classic+Embase 1947 to 2019 April 26; Wiley Cochrane Library

Ovid MEDLINE(R), Embase

| # | Searches                                                                                                                                                                                                                                                                                                                                                                                                                                                                                                                                                                                                                                                                                                                                                                                                                                                                                | Results     |
|---|-----------------------------------------------------------------------------------------------------------------------------------------------------------------------------------------------------------------------------------------------------------------------------------------------------------------------------------------------------------------------------------------------------------------------------------------------------------------------------------------------------------------------------------------------------------------------------------------------------------------------------------------------------------------------------------------------------------------------------------------------------------------------------------------------------------------------------------------------------------------------------------------|-------------|
| 1 | exp Pneumonia/                                                                                                                                                                                                                                                                                                                                                                                                                                                                                                                                                                                                                                                                                                                                                                                                                                                                          | 383548      |
| 2 | (pneumoni* or peripneumoni* or pleuropneumoni* or lobitis or ((pulmon* or lung*) adj inflammation*)).ti,ab.                                                                                                                                                                                                                                                                                                                                                                                                                                                                                                                                                                                                                                                                                                                                                                             | 436390      |
| 3 | 1 or 2                                                                                                                                                                                                                                                                                                                                                                                                                                                                                                                                                                                                                                                                                                                                                                                                                                                                                  | 599159      |
| 4 | exp Anti-Bacterial Agents/ use ppez or exp antibiotic agent/ use emczd                                                                                                                                                                                                                                                                                                                                                                                                                                                                                                                                                                                                                                                                                                                                                                                                                  | 212439<br>3 |
| 5 | exp Quinolones/ use ppez or exp quinolone derivative/ use emczd                                                                                                                                                                                                                                                                                                                                                                                                                                                                                                                                                                                                                                                                                                                                                                                                                         | 203031      |
| 6 | exp Macrolides/ use ppez                                                                                                                                                                                                                                                                                                                                                                                                                                                                                                                                                                                                                                                                                                                                                                                                                                                                | 105054      |
| 7 | exp beta-Lactams/ use ppez                                                                                                                                                                                                                                                                                                                                                                                                                                                                                                                                                                                                                                                                                                                                                                                                                                                              | 124562      |
| 8 | (((anti?bacterial or anti?mycobacterial or bacteriocidal) adj agent) or antibiotic* or bactericide* or quinolon* or fluoroquinolon* or aripiprazole* or Carteolol* or PQQ Cofactor* or Ciprofloxacin* or Enoxacin* or Enrofloxacin* or Gatifloxacin* or Gemifloxacin* or Moxifloxacin* or Norfloxacin* or Ofloxacin* or Pefloxacin* or Levofloxacin* or Fleroxacin* or Nalidixic Acid* or Nedocromil* or Oxolinic Acid* or macrolid* or Fidaxomicin* or Lucensomycin* or Maytansine* or Mepartricin* or Miocamycin* or Natamycin* or Nystatin* or Oleandomycin* or Oligomycin* or Sirolimus or Tylosin or Tacrolimus or beta?lactam* or carbapenem* or imipenem* or Ertapenem* or Meropenem* or Doripenem* or Thienamycin* or clavulanic acid* or sulbactam* or tazobactam* or amoxicillin* or penicillin* or ampicillin* or cephalosporin* or monobactam* or Moxalactam*).ti,ab,kf,kw. | 111793<br>5 |



|        |                                                                                                                                                                                                                                                                                                                                                              |             |
|--------|--------------------------------------------------------------------------------------------------------------------------------------------------------------------------------------------------------------------------------------------------------------------------------------------------------------------------------------------------------------|-------------|
| 9      | or/4-8                                                                                                                                                                                                                                                                                                                                                       | 257196<br>9 |
| 1<br>0 | 3 and 9                                                                                                                                                                                                                                                                                                                                                      | 171862      |
| 1<br>1 | animals/ not (humans/ and animals/)                                                                                                                                                                                                                                                                                                                          | 590205<br>7 |
| 1<br>2 | 10 not 11                                                                                                                                                                                                                                                                                                                                                    | 167922      |
| 1<br>3 | meta-analysis/ or systematic review/ or meta-analysis as topic/ or "meta analysis (topic)"/ or "systematic review (topic)"/ or exp technology assessment, biomedical/                                                                                                                                                                                        | 531189      |
| 1<br>4 | Meta Analysis.pt.                                                                                                                                                                                                                                                                                                                                            | 100250      |
| 1<br>5 | (meta analy* or metaanaly* or health technolog* assess*).ti,ab,kf,kw.                                                                                                                                                                                                                                                                                        | 352428      |
| 1<br>6 | (meta-analy* or metaanaly* or systematic review* or biomedical technology assessment* or bio-medical technology assessment*).mp,hw.                                                                                                                                                                                                                          | 679749      |
| 1<br>7 | ((systematic* or methodologic*) adj3 (review* or overview*)) or pooled analysis or published studies or published literature or hand search* or handsearch* or medline or pub med or pubmed or embase or cochrane or cinahl or data syntheses* or data extraction* or HTA or HTAs or (technolog* adj (assessment* or overview* or appraisal*))).ti,ab,kf,kw. | 702731      |
| 1<br>8 | (cochrane or (health adj2 technology assessment) or evidence report).jw.                                                                                                                                                                                                                                                                                     | 43467       |
| 1<br>9 | or/13-18                                                                                                                                                                                                                                                                                                                                                     | 954041      |
| 2<br>0 | 12 and 19                                                                                                                                                                                                                                                                                                                                                    | 4408        |
| 2<br>1 | remove duplicates from 20                                                                                                                                                                                                                                                                                                                                    | 3418        |

## Wiley Cochrane Library

- #1 MeSH descriptor: [Pneumonia] explode all trees 3131
- #2 (pneumoni\* or peripneumoni\* or pleuropneumoni\* or lobitis or ((pulmon\* or lung\*) NEXT/1 inflammation\*)):ti,ab 12214
- #3 #1 or #2 12920
- #4 MeSH descriptor: [Anti-Bacterial Agents] explode all trees 11090
- #5 MeSH descriptor: [Quinolones] explode all trees 4527
- #6 MeSH descriptor: [Macrolides] explode all trees 8038
- #7 MeSH descriptor: [beta-Lactams] explode all trees 8954
- #8 (((anti?bacterial or anti?mycobacterial or bacteriocidal) adj agent) or antibiotic\* or bactericide\* or quinolon\* or fluoroquinolon\* or aripiprazole\* or Carteolol\* or PQQ Cofactor\* or Ciprofloxacin\* or Enoxacin\* or Enrofloxacin\* or Gatifloxacin\* or Gemifloxacin\* or Moxifloxacin\* or Norfloxacin\* or Ofloxacin\* or Pefloxacin\* or Levofloxacin\* or Fleroxacin\* or Nalidixic Acid\* or Nedocromil\* or Oxolinic Acid\* or macrolid\* or Fidaxomicin\* or Lucensomycin\* or Maytansine\* or Mepartricin\* or Miocamycin\* or Natamycin\* or Nystatin\* or Oleandomycin\* or Oligomycin\* or Sirolimus or Tylosin or Tacrolimus or beta?lactam\* or carbapenem\* or imipenem\* or Ertapenem\* or Meropenem\* or Doripenem\* or Thienamycin\* or clavulanic acid\* or sulbactam\* or tazobactam\* or amoxicillin\* or penicillin\* or ampicillin\* or cephalosporin\* or monobactam\* or Moxalactam\*):ti,ab 10223
- #9 #4 or #5 or #6 or #7 or #8 30516
- #10 #3 and #9 in Cochrane Reviews 43

## Search 2 - RCTs

Search date: February 9, 2020

Databases searched: Ovid MEDLINE: Epub Ahead of Print, In-Process & Other Non-Indexed Citations, Ovid MEDLINE® Daily and Ovid MEDLINE® 1946-Present, Embase Classic+Embase 1947 to 2020 February 07; Wiley Cochrane (Trials)

Limits: Humans

Filters: RCTs

Ovid MEDLINE(R), Embase

| # | Searches                                                                                                    | Results |
|---|-------------------------------------------------------------------------------------------------------------|---------|
| 1 | exp Pneumonia/                                                                                              | 401913  |
| 2 | (pneumoni* or peripneumoni* or pleuropneumoni* or lobitis or ((pulmon* or lung*) adj inflammation*)):ti,ab. | 459813  |
| 3 | 1 or 2                                                                                                      | 628964  |

- 4 exp Anti-Bacterial Agents/ use ppez or exp antibiotic agent/ use emczd 2263032
- 5 exp Quinolones/ use ppez or exp quinolone derivative/ use emczd 213236
- 6 exp Macrolides/ use ppez 108087
- 7 exp beta-Lactams/ use ppez 127094
- 8 (((anti?bacterial or anti?mycobacterial or bacteriocidal) adj agent) or antibiotic\* or bactericide\* or quinolon\* or fluoroquinolon\* or aripiprazole\* or Carteolol\* or PQQ Cofactor\* or Ciprofloxacin\* or Enoxacin\* or Enrofloxacin\* or Gatifloxacin\* or Gemifloxacin\* or Moxifloxacin\* or Norfloxacin\* or Ofloxacin\* or Pefloxacin\* or Levofloxacin\* or Fleroxacin\* or Nalidixic Acid\* or Nedocromil\* or Oxolinic Acid\* or macrolid\* or Fidaxomicin\* or Lucensomycin\* or Maytansine\* or Mepartricin\* or Miocamycin\* or Natamycin\* or Nystatin\* or Oleandomycin\* or Oligomycin\* or Sirolimus or Tylosin or Tacrolimus or beta?lactam\* or carbapenem\* or imipenem\* or Ertapenem\* or Meropenem\* or Doripenem\* or Thienamycin\* or clavulanic acid\* or sulbactam\* or tazobactam\* or amoxicillin\* or penicillin\* or ampicillin\* or cephalosporin\* or monobactam\* or Moxalactam\*).ti,ab,kf,kw. 1178355
- 9 or/4-8 2713271
- 10 3 and 9 183305
- 11 animals/ not (humans/ and animals/) 6009818
- 12 10 not 11 179208
- 13 (Randomized Controlled Trial or Pragmatic Clinical Trial).pt. or exp Randomized Controlled Trials as Topic/ or "Randomized Controlled Trial (topic)"/ or Randomized Controlled Trial/ or Randomization/ or Random Allocation/ or Double-Blind Method/ or Double Blind Procedure/ or Double-Blind Studies/ or Single-Blind Method/ or Single Blind Procedure/ or Single-Blind Studies/ or Placebos/ or Placebo/ or (random\* or sham or placebo\*).ti,ab,hw,kf,kw. or ((singl\* or doubl\*) adj (blind\* or dumm\* or mask\*)).ti,ab,hw,kf,kw. or ((tripl\* or trebl\*) adj (blind\* or dumm\* or mask\*)).ti,ab,hw,kf,kw. 3546963
- 14 12 and 13 13969
- 15 limit 14 to yr="2012 -Current" 5788
- 16 remove duplicates from 15 4719

## Wiley Cochrane (Trials)

- #1 MeSH descriptor: [Pneumonia] explode all trees 3435
- #2 (pneumoni\* or peripneumoni\* or pleuropneumoni\* or lobitis or ((pulmon\* or lung\*) NEXT/1 inflammation\*)):ti,ab 13539
- #3 #1 or #2 14312
- #4 MeSH descriptor: [Anti-Bacterial Agents] explode all trees 11806

#5 MeSH descriptor: [Quinolones] explode all trees 4956

#6 MeSH descriptor: [Macrolides] explode all trees 8826

#7 MeSH descriptor: [beta-Lactams] explode all trees 9408

#8 (((anti?bacterial or anti?mycobacterial or bacteriocidal) NEXT/1 agent) or antibiotic\* or bacteriocide\* or quinolon\* or fluoroquinolon\* or aripiprazole\* or Carteolol\* or PQQ Cofactor\* or Ciprofloxacin\* or Enoxacin\* or Enrofloxacin\* or Gatifloxacin\* or Gemifloxacin\* or Moxifloxacin\* or Norfloxacin\* or Ofloxacin\* or Pefloxacin\* or Levofloxacin\* or Fleroxacin\* or Nalidixic Acid\* or Nedocromil\* or Oxolinic Acid\* or macrolid\* or Fidaxomicin\* or Lucensomycin\* or Maytansine\* or Mepartricin\* or Miocamycin\* or Natamycin\* or Nystatin\* or Oleandomycin\* or Oligomycin\* or Sirolimus or Tylosin or Tacrolimus or beta?lactam\* or carbapenem\* or imipenem\* or Ertapenem\* or Meropenem\* or Doripenem\* or Thienamycin\* or clavulanic acid\* or sulbactam\* or tazobactam\* or amoxicillin\* or penicillin\* or ampicillin\* or cephalosporin\* or monobactam\* or Moxalactam\*):ti,ab 46534

#9 #4 or #5 or #6 or #7 or #8 56576

#10 #3 and #9 with Publication Year from 2012 to 2020, in Trials 1720

**Question 5: Should oseltamivir be added to standard therapy in patients with sCAP and confirmed influenza?**

**Search 1 – SRs/MAs/HTAs**

Search date: September 5, 2019

Databases searched: Ovid MEDLINE: Epub Ahead of Print, In-Process & Other Non-Indexed Citations, Ovid MEDLINE® Daily and Ovid MEDLINE® 1946-Present, Embase Classic+Embase 1947 to 2019 September 04; Wiley Cochrane

Limits: Humans

Filters: Systematic reviews/Meta-Analyses, Health Technology Assessments

Ovid MEDLINE(R), Embase

| #  | Searches                                                                                                                          | Results |
|----|-----------------------------------------------------------------------------------------------------------------------------------|---------|
| 1  | exp Pneumonia/                                                                                                                    | 392788  |
| 2  | (pneumoni* or peripneumoni* or pleuropneumoni* or lobitis or ((pulmon* or lung*) adj inflammation*).ti,ab,kf,kw.                  | 458190  |
| 3  | 1 or 2                                                                                                                            | 620484  |
| 4  | exp Antiviral Agents/ use ppez                                                                                                    | 344307  |
| 5  | exp antivirus agent/ use emczd                                                                                                    | 952351  |
| 6  | *Enzyme Inhibitors/ use ppez                                                                                                      | 52071   |
| 7  | exp Neuraminidase/ai [Antagonists & Inhibitors]                                                                                   | 2032    |
| 8  | exp sialidase inhibitor/ use emczd                                                                                                | 12464   |
| 9  | ((Neuraminidase or sialidase) adj2 inhibit*).ti,ab,kf,kw.                                                                         | 6243    |
| 10 | (Zanamivir or Relenza or Laninamivir or Inavir or Peramivir or oseltamivir or tamiflu or anti?viral* or anti?virus*).ti,ab,kf,kw. | 207870  |
| 11 | 1 or/4-10                                                                                                                         | 142203  |
| 1  |                                                                                                                                   | 1       |

|        |                                                                                                                                                                                                                                                                                                                                                            |             |
|--------|------------------------------------------------------------------------------------------------------------------------------------------------------------------------------------------------------------------------------------------------------------------------------------------------------------------------------------------------------------|-------------|
| 1<br>2 | 3 and 11                                                                                                                                                                                                                                                                                                                                                   | 41824       |
| 1<br>3 | animals/ not (humans/ and animals/)                                                                                                                                                                                                                                                                                                                        | 595967<br>8 |
| 1<br>4 | 12 not 13                                                                                                                                                                                                                                                                                                                                                  | 40354       |
| 1<br>5 | meta-analysis/ or systematic review/ or meta-analysis as topic/ or "meta analysis (topic)"/ or "systematic review (topic)"/ or exp technology assessment, biomedical/                                                                                                                                                                                      | 561978      |
| 1<br>6 | Meta Analysis.pt.                                                                                                                                                                                                                                                                                                                                          | 104478      |
| 1<br>7 | (meta analy* or metaanaly* or health technolog* assess*).ti,ab,kf,kw.                                                                                                                                                                                                                                                                                      | 374080      |
| 1<br>8 | (meta-analy* or metaanaly* or systematic review* or biomedical technology assessment* or bio-medical technology assessment*).mp,hw.                                                                                                                                                                                                                        | 719184      |
| 1<br>9 | ((systematic* or methodologic*) adj3 (review* or overview*)) or pooled analysis or published studies or published literature or hand search* or handsearch* or medline or pub med or pubmed or embase or cochrane or cinahl or data synthes* or data extraction* or HTA or HTAs or (technolog* adj (assessment* or overview* or appraisal*))).ti,ab,kf,kw. | 741476      |
| 2<br>0 | (cochrane or (health adj2 technology assessment) or evidence report).jw.                                                                                                                                                                                                                                                                                   | 44142       |
| 2<br>1 | or/15-20                                                                                                                                                                                                                                                                                                                                                   | 100255<br>0 |
| 2<br>2 | 14 and 21                                                                                                                                                                                                                                                                                                                                                  | 1252        |
| 2<br>3 | remove duplicates from 22                                                                                                                                                                                                                                                                                                                                  | 1134        |

## Wiley Cochrane

|    |                                                     |
|----|-----------------------------------------------------|
| ID | Search Hits                                         |
| #1 | MeSH descriptor: [Pneumonia] explode all trees 3186 |

|     |                                                                                                                            |       |
|-----|----------------------------------------------------------------------------------------------------------------------------|-------|
| #2  | (pneumoni* or peripneumoni* or pleuropneumoni* or lobitis or ((pulmon* or lung*) NEAR inflammation*)):ti,ab                | 13460 |
| #3  | #1 or #2                                                                                                                   | 14159 |
| #4  | MeSH descriptor: [Antiviral Agents] explode all trees                                                                      | 7828  |
| #5  | MeSH descriptor: [Enzyme Inhibitors] this term only                                                                        | 2098  |
| #6  | MeSH descriptor: [Neuraminidase] explode all trees                                                                         | 111   |
| #7  | ((Neuraminidase or sialidase) near/2 inhibit*):ti,ab                                                                       | 184   |
| #8  | (Zanamivir or Relenza or Laninamivir or Inavir or Peramivir or oseltamivir or tamiflu or anti?viral* or anti?virus*):ti,ab | 5953  |
| #9  | #4 or #5 or #6 or #7 or #8                                                                                                 | 14300 |
| #10 | #3 and #9 in Cochrane Reviews                                                                                              | 9     |

## Search 2 – RCTs/SRs/MAs/HTAs

Search date: May 31, 2019

Databases searched: Ovid MEDLINE: Epub Ahead of Print, In-Process & Other Non-Indexed Citations, Ovid MEDLINE® Daily and Ovid MEDLINE® 1946-Present, Embase Classic+Embase 1947 to 2019 May 30; Wiley Cochrane

Limits: Human

Search filters: RCTs, Systematic Reviews, Meta-Analyses, and Health Technology Assessments

Ovid MEDLINE(R), Embase

| #  | Searches                                                                                                                          | Results |
|----|-----------------------------------------------------------------------------------------------------------------------------------|---------|
| 1  | exp Pneumonia/                                                                                                                    | 385783  |
| 2  | (pneumoni* or peripneumoni* or pleuropneumoni* or lobitis or ((pulmon* or lung*) adj inflammation*)):ti,ab,kf,kw.                 | 449816  |
| 3  | 1 or 2                                                                                                                            | 609380  |
| 4  | exp Antiviral Agents/ use ppez                                                                                                    | 341216  |
| 5  | exp antiviral agent/ use emcxd                                                                                                    | 930688  |
| 6  | *Enzyme Inhibitors/ use ppez                                                                                                      | 51616   |
| 7  | exp Neuraminidase/ai [Antagonists & Inhibitors]                                                                                   | 2004    |
| 8  | exp sialidase inhibitor/ use emcxd                                                                                                | 12187   |
| 9  | ((Neuraminidase or sialidase) adj2 inhibit*):ti,ab,kf,kw.                                                                         | 6121    |
| 10 | (Zanamivir or Relenza or Laninamivir or Inavir or Peramivir or oseltamivir or tamiflu or anti?viral* or anti?virus*):ti,ab,kf,kw. | 202896  |
| 11 | or/4-10                                                                                                                           | 1394953 |

- 12 3 and 11 40991
- 13 animals/ not (humans/ and animals/) 5917254
- 14 12 not 13 39541
- 15 meta-analysis/ or systematic review/ or meta-analysis as topic/ or "meta analysis (topic)"/ or "systematic review (topic)"/ or exp technology assessment, biomedical/ 539419
- 16 Meta Analysis.pt. 101403
- 17 (meta analy\* or metaanaly\* or health technolog\* assess\*).ti,ab,kf,kw. 357853
- 18 (meta-analy\* or metaanaly\* or systematic review\* or biomedical technology assessment\* or biomedical technology assessment\*).mp,hw. 689845
- 19 (((systematic\* or methodologic\*) adj3 (review\* or overview\*)) or pooled analysis or published studies or published literature or hand search\* or handsearch\* or medline or pub med or pubmed or embase or cochrane or cinahl or data syntheses\* or data extraction\* or HTA or HTAs or (technolog\* adj (assessment\* or overview\* or appraisal\*))).ti,ab,kf,kw. 712983
- 20 (cochrane or (health adj2 technology assessment) or evidence report).jw. 43684
- 21 (Randomized Controlled Trial or Pragmatic Clinical Trial).pt. or exp Randomized Controlled Trials as Topic/ or "Randomized Controlled Trial (topic)"/ or Randomized Controlled Trial/ or Randomization/ or Random Allocation/ or Double-Blind Method/ or Double Blind Procedure/ or Double-Blind Studies/ or Single-Blind Method/ or Single Blind Procedure/ or Single-Blind Studies/ or Placebos/ or Placebo/ or (random\* or sham or placebo\*).ti,ab,hw,kf,kw. or ((singl\* or doubl\*) adj (blind\* or dumm\* or mask\*)).ti,ab,hw,kf,kw. or ((tripl\* or trebl\*) adj (blind\* or dumm\* or mask\*)).ti,ab,hw,kf,kw. 3380440
- 22 or/15-21 4021666
- 23 14 and 22 4995
- 24 remove duplicates from 23 4659

#### Wiley Cochrane

- #1 MeSH descriptor: [Pneumonia] explode all trees 3163
- #2 (pneumoni\* or peripneumoni\* or pleuropneumoni\* or lobitis or ((pulmon\* or lung\*) NEAR inflammation\*)):ti,ab 13108
- #3 #1 or #2 13804
- #4 MeSH descriptor: [Antiviral Agents] explode all trees 7758
- #5 MeSH descriptor: [Enzyme Inhibitors] this term only 2090
- #6 MeSH descriptor: [Neuraminidase] explode all trees 111
- #7 ((Neuraminidase or sialidase) near/2 inhibit\*):ti,ab 175
- #8 (Zanamivir or Relenza or Laninamivir or Inavir or Peramivir or oseltamivir or tamiflu or anti?viral\* or anti?virus\*):ti,ab 83



#9 #4 or #5 or #6 or #7 or #8 9998  
 #10 #3 and #9 91

**Question 6. Does the addition of steroids to antibiotic therapy in specific sCAP populations lead to better outcomes in comparison to when steroid therapy is not used?**

Search 1 – RCTs

Search date: August 27, 2019

Databases searched: Ovid MEDLINE: Epub Ahead of Print, In-Process & Other Non-Indexed Citations, Ovid MEDLINE® Daily and Ovid MEDLINE® 1946-Present, Embase Classic+Embase 1947 to 2019 August 26; Wiley Cochrane

Limits: Humans, Randomized Controlled Trials; Year 2000 onwards

Ovid MEDLINE(R), Embase

| #  | Searches                                                                                                                                                                                                    | Results     |
|----|-------------------------------------------------------------------------------------------------------------------------------------------------------------------------------------------------------------|-------------|
| 1  | exp Pneumonia/                                                                                                                                                                                              | 385414      |
| 2  | (pneumoni* or peripneumoni* or pleuropneumoni* or lobitis or ((pulmon* or lung*) adj inflammation*)).ti,ab,kf,kw.                                                                                           | 449222      |
| 3  | 1 or 2                                                                                                                                                                                                      | 608748      |
| 4  | exp Adrenal Cortex Hormones/ use ppez                                                                                                                                                                       | 385182      |
| 5  | exp Steroids/ use ppez                                                                                                                                                                                      | 831891      |
| 6  | exp Steroid/ use emczd                                                                                                                                                                                      | 158054<br>9 |
| 7  | (steroid* or adrenal cortex hormone* or corticosteroid* or corticoid* or glucocorticoid* or glucocorticosteroid* or Prednisone* or Methylprednisolone* or Hydrocortisone* or Fludrocortisone*).ti,ab,kf,kw. | 102359<br>4 |
| 8  | or/4-7                                                                                                                                                                                                      | 279942<br>5 |
| 9  | 3 and 8                                                                                                                                                                                                     | 62862       |
| 10 | 1 animals/ not (humans/ and animals/)                                                                                                                                                                       | 591556<br>4 |

|   |                                                                                                                                                                                                                                                                                                                                                                                                                                                                                                                                                                                                               |        |
|---|---------------------------------------------------------------------------------------------------------------------------------------------------------------------------------------------------------------------------------------------------------------------------------------------------------------------------------------------------------------------------------------------------------------------------------------------------------------------------------------------------------------------------------------------------------------------------------------------------------------|--------|
| 1 | 9 not 10                                                                                                                                                                                                                                                                                                                                                                                                                                                                                                                                                                                                      | 61615  |
| 1 |                                                                                                                                                                                                                                                                                                                                                                                                                                                                                                                                                                                                               |        |
|   | (Randomized Controlled Trial or Pragmatic Clinical Trial).pt. or exp Randomized Controlled Trials as Topic/ or "Randomized Controlled Trial (topic)"/ or Randomized Controlled Trial/ or Randomization/ or Random Allocation/ or Double-Blind Method/ or Double Blind Procedure/ or Double-Blind Studies/ or Single-Blind Method/ or Single Blind Procedure/ or Single-Blind Studies/ or Placebos/ or Placebo/ or (random* or sham or placebo*).ti,ab,hw,kf,kw. or ((singl* or doubl*) adj (blind* or dumm* or mask*)).ti,ab,hw,kf,kw. or ((tripl* or trebl*) adj (blind* or dumm* or mask*)).ti,ab,hw,kf,kw. | 337679 |
| 1 |                                                                                                                                                                                                                                                                                                                                                                                                                                                                                                                                                                                                               |        |
| 2 |                                                                                                                                                                                                                                                                                                                                                                                                                                                                                                                                                                                                               | 0      |
| 1 | 11 and 12                                                                                                                                                                                                                                                                                                                                                                                                                                                                                                                                                                                                     | 6473   |
| 3 |                                                                                                                                                                                                                                                                                                                                                                                                                                                                                                                                                                                                               |        |
| 1 | limit 13 to yr="2000 -Current"                                                                                                                                                                                                                                                                                                                                                                                                                                                                                                                                                                                | 5998   |
| 4 |                                                                                                                                                                                                                                                                                                                                                                                                                                                                                                                                                                                                               |        |
| 1 | remove duplicates from 14                                                                                                                                                                                                                                                                                                                                                                                                                                                                                                                                                                                     | 5421   |
| 5 |                                                                                                                                                                                                                                                                                                                                                                                                                                                                                                                                                                                                               |        |

## Wiley Cochrane

- #1 MeSH descriptor: [Pneumonia] explode all trees 3148
- #2 (pneumoni\* or peripneumoni\* or pleuropneumoni\* or lobitis or ((pulmon\* or lung\*) NEXT/1 inflammation\*)):ti,ab 12332
- #3 #1 or #2 13041
- #4 MeSH descriptor: [Steroids] explode all trees 53921
- #5 MeSH descriptor: [Adrenal Cortex Hormones] explode all trees 13714
- #6 (steroid\* or adrenal cortex hormone\* or corticosteroid\* or corticoid\* or glucocorticoid\* or glucocorticosteroid\* or Prednisone\* or Methylprednisolone\* or Hydrocortisone\* or Fludrocortisone\*) 67138
- #7 #4 or #5 or #6 100508
- #8 #3 and #7 with Publication Year from 2000 to 2019, in Trials 911

## Search 2 – SRs/MAs/HTAs

Search date: May 11, 2019

Databases searched: Ovid MEDLINE: Epub Ahead of Print, In-Process & Other Non-Indexed Citations, Ovid MEDLINE® Daily and Ovid MEDLINE® 1946-Present, Embase Classic+Embase 1947 to 2019 May 09; Wiley Cochrane Library

Limits: Systematic Reviews, Meta-Analyses, Health Technology Assessments

Ovid MEDLINE(R), Embase

| #  | Searches                                                                                                                                                                                                                                                                                                                                                   | Results |
|----|------------------------------------------------------------------------------------------------------------------------------------------------------------------------------------------------------------------------------------------------------------------------------------------------------------------------------------------------------------|---------|
| 1  | exp Pneumonia/                                                                                                                                                                                                                                                                                                                                             | 384181  |
| 2  | (pneumoni* or peripneumoni* or pleuropneumoni* or lobitis or ((pulmon* or lung*) adj inflammation*)).ti,ab,kf,kw.                                                                                                                                                                                                                                          | 447139  |
| 3  | 1 or 2                                                                                                                                                                                                                                                                                                                                                     | 606031  |
| 4  | exp Adrenal Cortex Hormones/ use ppez                                                                                                                                                                                                                                                                                                                      | 384655  |
| 5  | exp Steroids/ use ppez                                                                                                                                                                                                                                                                                                                                     | 830640  |
| 6  | exp Steroid/ use emczd                                                                                                                                                                                                                                                                                                                                     | 1575477 |
| 7  | (steroid* or adrenal cortex hormone* or corticosteroid* or corticoid* or glucocorticoid* or glucocorticosteroid* or Prednisone* or Methylprednisolone* or Hydrocortisone* or Fludrocortisone*).ti,ab,kf,kw.                                                                                                                                                | 1018991 |
| 8  | or/4-7                                                                                                                                                                                                                                                                                                                                                     | 2789942 |
| 9  | 3 and 8                                                                                                                                                                                                                                                                                                                                                    | 62553   |
| 10 | animals/ not (humans/ and animals/)                                                                                                                                                                                                                                                                                                                        | 5905715 |
| 11 | 9 not 10                                                                                                                                                                                                                                                                                                                                                   | 61309   |
| 12 | meta-analysis/ or systematic review/ or meta-analysis as topic/ or "meta analysis (topic)"/ or "systematic review (topic)"/ or exp technology assessment, biomedical/                                                                                                                                                                                      | 534252  |
| 13 | Meta Analysis.pt.                                                                                                                                                                                                                                                                                                                                          | 100522  |
| 14 | (meta analy* or metaanaly* or health technolog* assess*).ti,ab,kf,kw.                                                                                                                                                                                                                                                                                      | 354367  |
| 15 | (meta-analy* or metaanaly* or systematic review* or biomedical technology assessment* or bio-medical technology assessment*).mp,hw.                                                                                                                                                                                                                        | 683263  |
| 16 | ((systematic* or methodologic*) adj3 (review* or overview*)) or pooled analysis or published studies or published literature or hand search* or handsearch* or medline or pub med or pubmed or embase or cochrane or cinahl or data synthes* or data extraction* or HTA or HTAs or (technolog* adj (assessment* or overview* or appraisal*))).ti,ab,kf,kw. | 706043  |
| 17 | (cochrane or (health adj2 technology assessment) or evidence report).jw.                                                                                                                                                                                                                                                                                   | 43551   |
| 18 | or/12-17                                                                                                                                                                                                                                                                                                                                                   | 958118  |
| 19 | 11 and 18                                                                                                                                                                                                                                                                                                                                                  | 2110    |
| 20 | remove duplicates from 19                                                                                                                                                                                                                                                                                                                                  | 1830    |

Wiley Cochrane Library

- #1 MeSH descriptor: [Pneumonia] explode all trees 3148
- #2 (pneumoni\* or peripneumoni\* or pleuropneumoni\* or lobitis or ((pulmon\* or lung\*) NEXT/1 inflammation\*)):ti,ab 12334
- #3 #1 or #2 13043
- #4 MeSH descriptor: [Steroids] explode all trees 53922
- #5 MeSH descriptor: [Adrenal Cortex Hormones] explode all trees 13714
- #6 (steroid\* or adrenal cortex hormone\* or corticosteroid\* or corticoid\* or glucocorticoid\* or glucocorticosteroid\* or Prednisone\* or Methylprednisolone\* or Hydrocortisone\* or Fludrocortisone\*):ti,ab 48899
- #7 #4 or #5 or #6 89506
- #8 #3 AND #7 in Cochrane Reviews 36

\*\*Included Meduri et al. ICM 2022

**Question 8. Do patients with sCAP and aspiration risk factors have better outcomes (mortality, LOS, treatment failure) if treated with a risk-based therapy regimen instead of standard sCAP antibiotics?**

Search date: December 12, 2021

Databases searched: PubMed (1988 – 2021)

Search Filters: none

| Search | Query                                                                                                                                                                                                                                                                                                                                                                                                                                                                                                                                                                                                                                                                                                                                                                                                                                                                                                                                                                                                                                                                                                                                                                                                                                                                                                                                                                                                                                                                                                                                                                                                                                                                                                                                                                                                                                                                                                                                                                                                                                                                                                                                                    | Results             |
|--------|----------------------------------------------------------------------------------------------------------------------------------------------------------------------------------------------------------------------------------------------------------------------------------------------------------------------------------------------------------------------------------------------------------------------------------------------------------------------------------------------------------------------------------------------------------------------------------------------------------------------------------------------------------------------------------------------------------------------------------------------------------------------------------------------------------------------------------------------------------------------------------------------------------------------------------------------------------------------------------------------------------------------------------------------------------------------------------------------------------------------------------------------------------------------------------------------------------------------------------------------------------------------------------------------------------------------------------------------------------------------------------------------------------------------------------------------------------------------------------------------------------------------------------------------------------------------------------------------------------------------------------------------------------------------------------------------------------------------------------------------------------------------------------------------------------------------------------------------------------------------------------------------------------------------------------------------------------------------------------------------------------------------------------------------------------------------------------------------------------------------------------------------------------|---------------------|
| #2     | <p>Search: <b>((Aspiration pneumonia) AND (severe) AND (community) AND (therapy))</b></p> <p>("pneumonia, aspiration"[MeSH Terms] OR ("pneumonia"[All Fields] AND "aspiration"[All Fields]) OR "aspiration pneumonia"[All Fields] OR ("aspiration"[All Fields] AND "pneumonia"[All Fields])) AND ("sever"[All Fields] OR "severe"[All Fields] OR "severed"[All Fields] OR "severely"[All Fields] OR "severer"[All Fields] OR "severes"[All Fields] OR "severing"[All Fields] OR "severities"[All Fields] OR "severity"[All Fields] OR "severs"[All Fields]) AND ("communal"[All Fields] OR "communalism"[All Fields] OR "communalities"[All Fields] OR "communality"[All Fields] OR "communally"[All Fields] OR "commune"[All Fields] OR "communes"[All Fields] OR "community s"[All Fields] OR "communitys"[All Fields] OR "residence characteristics"[MeSH Terms] OR ("residence"[All Fields] AND "characteristics"[All Fields]) OR "residence characteristics"[All Fields] OR "communities"[All Fields] OR "community"[All Fields]) AND ("therapeutics"[MeSH Terms] OR "therapeutics"[All Fields] OR "therapies"[All Fields] OR "therapy"[MeSH Subheading] OR "therapy"[All Fields] OR "therapy s"[All Fields] OR "therapys"[All Fields])</p> <p><b>Translations</b></p> <p><b>Aspiration pneumonia:</b> "pneumonia, aspiration"[MeSH Terms] OR ("pneumonia"[All Fields] AND "aspiration"[All Fields]) OR "aspiration pneumonia"[All Fields] OR ("aspiration"[All Fields] AND "pneumonia"[All Fields])</p> <p><b>severe:</b> "sever"[All Fields] OR "severe"[All Fields] OR "severed"[All Fields] OR "severely"[All Fields] OR "severer"[All Fields] OR "severes"[All Fields] OR "severing"[All Fields] OR "severities"[All Fields] OR "severity"[All Fields] OR "severs"[All Fields]</p> <p><b>community:</b> "communal"[All Fields] OR "communalism"[All Fields] OR "communalities"[All Fields] OR "communality"[All Fields] OR "communally"[All Fields] OR "commune"[All Fields] OR "communes"[All Fields] OR "community's"[All Fields] OR "communitys"[All Fields] OR "residence characteristics"[MeSH Terms] OR ("residence"[All Fields] AND</p> | <a href="#">108</a> |

| Search | Query                                                                                                                                                                                                                                                                                                                                                                                                                                                                                                                                                                                                                                                                                                                                                                                                                                                                                                                                                                                                                                                                                                                                                                                                                                                                                                                                                                                                                                                                                                                                                                                                                                                                                                                                                                                                                                                                                                                                                                                                                                                                  | Results             |
|--------|------------------------------------------------------------------------------------------------------------------------------------------------------------------------------------------------------------------------------------------------------------------------------------------------------------------------------------------------------------------------------------------------------------------------------------------------------------------------------------------------------------------------------------------------------------------------------------------------------------------------------------------------------------------------------------------------------------------------------------------------------------------------------------------------------------------------------------------------------------------------------------------------------------------------------------------------------------------------------------------------------------------------------------------------------------------------------------------------------------------------------------------------------------------------------------------------------------------------------------------------------------------------------------------------------------------------------------------------------------------------------------------------------------------------------------------------------------------------------------------------------------------------------------------------------------------------------------------------------------------------------------------------------------------------------------------------------------------------------------------------------------------------------------------------------------------------------------------------------------------------------------------------------------------------------------------------------------------------------------------------------------------------------------------------------------------------|---------------------|
|        | <p>"characteristics"[All Fields]) OR "residence characteristics"[All Fields] OR "communities"[All Fields] OR "community"[All Fields]</p> <p><b>therapy:</b> "therapeutics"[MeSH Terms] OR "therapeutics"[All Fields] OR "therapies"[All Fields] OR "therapy"[Subheading] OR "therapy"[All Fields] OR "therapy's"[All Fields] OR "therapys"[All Fields]</p>                                                                                                                                                                                                                                                                                                                                                                                                                                                                                                                                                                                                                                                                                                                                                                                                                                                                                                                                                                                                                                                                                                                                                                                                                                                                                                                                                                                                                                                                                                                                                                                                                                                                                                             |                     |
| #1     | <p>Search: <b>((Aspiration pneumonia) AND (severe)) AND (community)</b></p> <p>("pneumonia, aspiration"[MeSH Terms] OR ("pneumonia"[All Fields] AND "aspiration"[All Fields]) OR "aspiration pneumonia"[All Fields] OR ("aspiration"[All Fields] AND "pneumonia"[All Fields])) AND ("sever"[All Fields] OR "severe"[All Fields] OR "severed"[All Fields] OR "severely"[All Fields] OR "severer"[All Fields] OR "severes"[All Fields] OR "severing"[All Fields] OR "severities"[All Fields] OR "severity"[All Fields] OR "severs"[All Fields]) AND ("communal"[All Fields] OR "communalism"[All Fields] OR "communalities"[All Fields] OR "communality"[All Fields] OR "communally"[All Fields] OR "commune"[All Fields] OR "communes"[All Fields] OR "community s"[All Fields] OR "communitys"[All Fields] OR "residence characteristics"[MeSH Terms] OR ("residence"[All Fields] AND "characteristics"[All Fields]) OR "residence characteristics"[All Fields] OR "communities"[All Fields] OR "community"[All Fields])</p> <p><b>Translations</b></p> <p><b>Aspiration pneumonia:</b> "pneumonia, aspiration"[MeSH Terms] OR ("pneumonia"[All Fields] AND "aspiration"[All Fields]) OR "aspiration pneumonia"[All Fields] OR ("aspiration"[All Fields] AND "pneumonia"[All Fields])</p> <p><b>severe:</b> "sever"[All Fields] OR "severe"[All Fields] OR "severed"[All Fields] OR "severely"[All Fields] OR "severer"[All Fields] OR "severes"[All Fields] OR "severing"[All Fields] OR "severities"[All Fields] OR "severity"[All Fields] OR "severs"[All Fields]</p> <p><b>community:</b> "communal"[All Fields] OR "communalism"[All Fields] OR "communalities"[All Fields] OR "communality"[All Fields] OR "communally"[All Fields] OR "commune"[All Fields] OR "communes"[All Fields] OR "community's"[All Fields] OR "communitys"[All Fields] OR "residence characteristics"[MeSH Terms] OR ("residence"[All Fields] AND "characteristics"[All Fields]) OR "residence characteristics"[All Fields] OR "communities"[All Fields] OR "community"[All Fields]</p> | <a href="#">147</a> |
